# Supplementary material for: Additive effects on palladium-catalyzed deprotonative-cross-coupling processes (DCCP) of sp3C–H bonds in diarylmethanes
Source: Royal Society of Chemistry journal article supplement (doi:10.1039/c2sc21673f), 2012-11-29

## SUPPORTING INFORMATION

### **Additive Effects on Palladium-Catalyzed Deprotonative-Cross-Coupling Processes (DCCP) of $sp^3$ C–H Bonds in Diarylmethanes**

Ana Bellomo, Jiadi Zhang, Nisalak Trongsirawat and Patrick J. Walsh\*

Roy and Diana Vagelos Laboratories, Penn/Merck High-Throughput Experimentation Laboratory, Department of Chemistry, University of Pennsylvania, 231 South 34th Street, Philadelphia, Pennsylvania 19104-6323, United States.

#### TABLE OF CONTENTS

|                                                                                                                             |        |
|-----------------------------------------------------------------------------------------------------------------------------|--------|
| 1. General Methods                                                                                                          | S2     |
| 2. Procedure and Characterization for the Room-Temperature Deprotonation/Benylation of Diphenylmethane and 2-Benzylpyridine | S3     |
| 3. General Procedure and Characterization for the Pd-Catalyzed DCCP of Diarylmethanes in the Presence of Additives          | S3-S12 |
| 4. High-throughput Experimentation Screenings                                                                               | S13    |
| 5. References                                                                                                               | S25    |
| 6. NMR Spectra                                                                                                              | S26    |

**General Methods.** All reactions were performed under nitrogen using oven-dried glassware and standard Schlenk or vacuum line techniques. Air- and moisture sensitive solutions were handled under nitrogen and transferred *via* syringe. Anhydrous CPME, DME and diglyme were purchased from Sigma-Aldrich and used as solvent without further purification. Unless otherwise stated, reagents were commercially available and used as purchased without further purification. Chemicals were obtained from Sigma-Aldrich, Acros, TCI America or Matrix Scientific. The progress of the reactions was monitored by thin-layer chromatography using Whatman Partisil K6F 250  $\mu\text{m}$  precoated 60 Å silica gel plates and visualized by short-wave ultraviolet light as well as by treatment with ceric ammonium molybdate (CAM) stain or iodine. Silica gel (230–400 mesh, Silicycle) was used for flash chromatography. The  $^1\text{H}$  NMR and  $^{13}\text{C}\{^1\text{H}\}$  NMR spectra were obtained using a Bruker AM-500 Fourier-transform NMR spectrometer at 500 and 125 MHz, respectively. Chemical shifts are reported in units of parts per million (ppm) downfield from tetramethylsilane (TMS), and all coupling constants are reported in hertz. The infrared spectra were obtained on KBr plates using a Perkin-Elmer Spectrum 100 Series FTIR spectrometer. High resolution mass spectrometry (HRMS) data were obtained on a Waters LC-TOF mass spectrometer (model LCT-XE Premier) using chemical ionization (CI) or electrospray ionization (ESI) in positive or negative mode, depending on the analyte. Melting points were determined on a Unimelt Thomas-Hoover melting point apparatus and are uncorrected.

### Procedure and Characterization for the Room-Temperature Deprotonation/Benylation of Diphenylmethane (1a) and 2-Benzylpyridine (1b).

An oven-dried reaction vial equipped with a stir bar was charged with 3 equiv of the base (0.3 mmol) under a nitrogen atmosphere followed by 1 mL of dry CPME, and the reaction mixture was stirred for 5 min. Substrate **1a** or **1b** (0.3 mmol) was then added to the reaction followed by benzyl chloride (11.5  $\mu$ L, 0.1 mmol). The reaction mixture was stirred for 12 h at rt and then quenched with two drops of H<sub>2</sub>O, diluted with 3 mL of ethyl acetate, and filtered over a pad of MgSO<sub>4</sub> and silica. The pad was rinsed with additional ethyl acetate and the solution was concentrated under vacuum. The crude material was loaded onto a silica gel column and purified by flash chromatography. In the case of the use of 12-crown-4, the additive was added along with LiN(SiMe<sub>3</sub>)<sub>2</sub>.

#### 1,1,2-triphenylethane

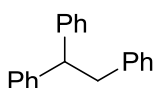

The reaction was performed as described above using KN(SiMe<sub>3</sub>)<sub>2</sub> as base. The crude material was purified by flash chromatography on silica gel (eluted with hexanes to EtOAc:hexanes = 2:98) to give the product (24.7 mg, 96% yield) as a colorless oil. R<sub>f</sub> = 0.25 (hexanes). The NMR spectral data match the previously published data.<sup>1</sup>

#### 2-(1,2-diphenylethyl)pyridine

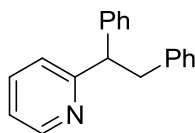

The reaction was performed as described above using KN(SiMe<sub>3</sub>)<sub>2</sub> as base. The crude material was purified by flash chromatography on silica gel (eluted with EtOAc:hexanes = 1:9) to give the product (25.9 mg, 99% yield) as a colorless oil. R<sub>f</sub> = 0.33 (EtOAc:hexanes = 1:9). The NMR spectral data match the previously published data.<sup>2</sup>

### General Procedure and Characterization for the Pd-Catalyzed DCCP of Diarylmethanes in the presence of Additives.

An oven-dried reaction vial charged with a solution (from a stock solution) of Pd(OAc)<sub>2</sub> (1.1 mg, 5 mol %) and NiXantphos (5.1 mg, 10 mol %) in 1 mL THF and the solvent was evaporated at rt under reduced pressure. The vial was equipped with a stir bar, taken inside the glovebox and it was charged with the corresponding base (0.3 mmol), additive (0.6 mmol 12-crown-4 or 0.03 mmol 15-crown-5 or 0.6 mmol HMTETA or 0.6 mmol diglyme) and 1 mL of dry CPME. After stirring for 30 min., the diarylmethane (0.3 mmol when using NaN(SiMe<sub>3</sub>)<sub>2</sub>/15-crown-5 and 0.12 mmol for all other cases) was added to the reaction followed by the aryl bromide (0.1 mmol). The vial was sealed and the reaction mixture was stirred for 12 h at rt. The reaction was quenched with two drops of H<sub>2</sub>O, diluted with 3 mL of ethyl acetate, and filtered over a pad of MgSO<sub>4</sub> and silica. The pad was rinsed with additional ethyl acetate, and the solution was concentrated under vacuum. The crude material was loaded onto a silica gel column and purified by flash chromatography.

### 3aa – (4-*tert*-butylphenyl)diphenylmethane

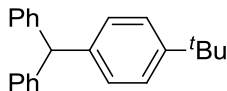

The reaction was performed following the General Procedure described above with **1a** (50.2  $\mu\text{L}$ , 0.3 mmol),  $\text{NaN}(\text{SiMe}_3)_2$  (55.0 mg, 0.3 mmol), 15-crown-5 (5.9  $\mu\text{L}$ , 0.03 mmol) and **2a** (17.3  $\mu\text{L}$ , 0.1 mmol). The crude material was purified by flash chromatography on silica gel (eluted with hexanes to EtOAc:hexanes = 2:98) to give the product (30.5 mg, 99% yield) as a white solid.  $R_f = 0.33$  (hexanes). The NMR spectral data match the previously published data.<sup>3</sup>

### 3ab – (4-fluorophenyl)diphenylmethane

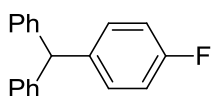

The reaction was performed following the General Procedure described above with **1a** (50.2  $\mu\text{L}$ , 0.3 mmol),  $\text{NaN}(\text{SiMe}_3)_2$  (55.2 mg, 0.3 mmol), 15-crown-5 (5.9  $\mu\text{L}$ , 0.03 mmol) and **2b** (11.0  $\mu\text{L}$ , 0.1 mmol). The crude material was purified by flash chromatography on silica gel (eluted with hexanes) to give the product (16.6 mg, 63% yield) as a white solid.  $R_f = 0.33$  (hexanes). The NMR spectral data match the previously published data.<sup>3</sup>

### 3ad – (4-methoxyphenyl)diphenylmethane

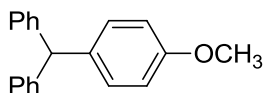

The reaction was performed following the General Procedure described above with **1a** (20.1  $\mu\text{L}$ , 0.12 mmol),  $\text{LiN}(\text{SiMe}_3)_2$  (50.2 mg, 0.3 mmol), 12-crown-4 (97.1  $\mu\text{L}$ , 0.6 mmol) and **2d** (12.5  $\mu\text{L}$ , 0.1 mmol) or **1a** (50.2  $\mu\text{L}$ , 0.3 mmol),  $\text{NaN}(\text{SiMe}_3)_2$  (55.0 mg, 0.3 mmol), 15-crown-5 (5.9  $\mu\text{L}$ , 0.03 mmol) and **2d** (12.5  $\mu\text{L}$ , 0.1 mmol). The crude material was purified by flash chromatography on silica gel (eluted with hexanes to EtOAc:hexanes = 5:95) to give the product (27.1 mg, 99% yield and 26.7 mg, 97% yield respectively) as a colorless oil.  $R_f = 0.25$  (hexanes). The NMR spectral data match the previously published data.<sup>3</sup>

### 3ae – (*N,N*-dimethylaminophenyl)diphenylmethane

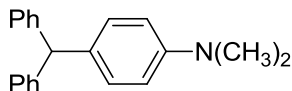

The reaction was performed following the General Procedure described above with **1a** (50.2  $\mu\text{L}$ , 0.3 mmol),  $\text{NaN}(\text{SiMe}_3)_2$  (55.0 mg, 0.3 mmol), 15-crown-5 (5.9  $\mu\text{L}$ , 0.03 mmol) and **2e** (20.0 mg, 0.1 mmol). The crude material was purified by flash chromatography on silica gel (eluted with EtOAc:hexanes = 5:95) to give the product (29.0 mg, 99% yield) as a white solid.  $R_f = 0.3$  (EtOAc:hexanes = 5:95). The NMR spectral data match the previously published data.<sup>3</sup>

### 3af – (1-naphthyl)diphenylmethane

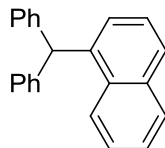

The reaction was performed following the General Procedure described above with **1a** (20.1  $\mu\text{L}$ , 0.12 mmol),  $\text{NaN}(\text{SiMe}_3)_2$  (54.9 mg, 0.3 mmol), 15-crown-5 (5.9  $\mu\text{L}$ , 0.03 mmol) and **2f** (14.0  $\mu\text{L}$ , 0.1 mmol). The crude material was purified by flash chromatography on silica gel (eluted with hexanes to EtOAc:hexanes = 3:97) to give the product (22.8 mg, 77% yield) as a white solid.  $R_f = 0.33$  (hexanes); m.p. = 136–139  $^\circ\text{C}$ ;  $^1\text{H}$  NMR (500 MHz,  $\text{CDCl}_3$ ):  $\delta$  7.98 (d,  $J = 8.5$  Hz, 1H), 7.84 (d,  $J = 8.0$  Hz, 1H), 7.74 (d,  $J = 8.0$  Hz, 1H), 7.45 – 7.32 (m, 3H), 7.30 – 7.24 (m, 4H), 7.24 – 7.18 (m, 2H), 7.14 – 7.07 (m, 4H), 6.94 (d,  $J = 7.0$  Hz, 1H), 6.27 (s, 1H) ppm;  $^{13}\text{C}\{^1\text{H}\}$  NMR (125 MHz,  $\text{CDCl}_3$ ):  $\delta$  143.9, 140.1, 134.1, 132.1, 129.9, 128.9, 128.6, 127.8, 127.5, 126.6, 126.3, 125.6, 125.4, 124.5, 53.4 ppm; IR (thin film): 3058, 3025, 1598, 1493, 1449, 1395, 1030, 787, 725, 699  $\text{cm}^{-1}$ ; HRMS calcd. for  $\text{C}_{23}\text{H}_{18}^+$  294.1409, observed 294.1396  $[\text{M}]^+$ .

### 3ag – (4-cyanophenyl)diphenylmethane

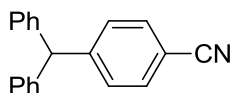

The reaction was performed following the General Procedure described above with **1a** (20.1  $\mu\text{L}$ , 0.12 mmol),  $\text{LiN}(\text{SiMe}_3)_2$  (50.1 mg, 0.3 mmol), 12-crown-4 (97.1  $\mu\text{L}$ , 0.6 mmol) and **2g** (18.2 mg, 0.1 mmol). The crude material was purified by flash chromatography on silica gel (eluted with hexanes to EtOAc:hexanes = 5:95) to give the product (18.1 mg, 67% yield) as a colorless oil.  $R_f = 0.25$  (hexanes). The NMR spectral data match the previously published data.<sup>4</sup>

### 3ai – (2-pyridyl)diphenylmethane

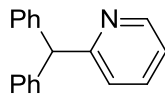

The reaction was performed following the General Procedure described above with **1a** (20.1  $\mu\text{L}$ , 0.12 mmol),  $\text{LiN}(\text{SiMe}_3)_2$  (50.2 mg, 0.3 mmol), 12-crown-4 (97.1  $\mu\text{L}$ , 0.6 mmol) and **2i** (9.5  $\mu\text{L}$ , 0.1 mmol). The crude material was purified by flash chromatography on silica gel (eluted with hexanes to EtOAc:hexanes = 2:8) to give the product (18.3 mg, 75% yield) as a white solid.  $R_f = 0.40$  (EtOAc:hexanes = 2:8). The NMR spectral data match the previously published data.<sup>5</sup>

### 3ba – (4-*tert*-butylphenyl)(2-pyridyl)phenylmethane

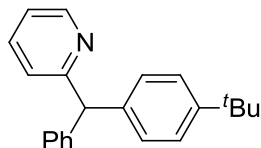

The reaction was performed following the General Procedure described above with **1b** (19.3  $\mu\text{L}$ , 0.12 mmol),  $\text{LiN}(\text{SiMe}_3)_2$  (50.0 mg, 0.3 mmol), 12-crown-4 (97.1  $\mu\text{L}$ , 0.6 mmol) and **2a** (17.3  $\mu\text{L}$ , 0.1 mmol) or **1b** (50.8  $\mu\text{L}$ , 0.3 mmol),  $\text{NaN}(\text{SiMe}_3)_2$  (55.0 mg, 0.3 mmol), diglyme (85.9  $\mu\text{L}$ , 0.6 mmol) and **2a** (17.3  $\mu\text{L}$ , 0.1 mmol). The crude material was purified by flash chromatography on silica gel (eluted with hexanes to EtOAc:hexanes = 1:9) to give the product (28.9 mg, 96% yield and 30.3 mg, 99% yield respectively) as a colorless oil.  $R_f = 0.3$  (EtOAc:hexanes = 1:9). The NMR spectral data match the previously published data.<sup>3</sup>

### 3bb – (4-fluorophenyl)(2-pyridyl)phenylmethane

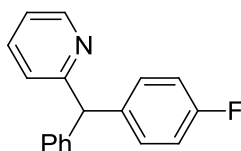

The reaction was performed following the General Procedure described above with **1b** (50.8  $\mu\text{L}$ , 0.3 mmol),  $\text{NaN}(\text{SiMe}_3)_2$  (55.1 mg, 0.3 mmol), 15-crown-5 (5.9  $\mu\text{L}$ , 0.03 mmol) and **2b** (11.0  $\mu\text{L}$ , 0.1 mmol). The crude material was purified by flash chromatography on silica gel (eluted with hexanes to EtOAc:hexanes = 1:9) to give the product (26.0 mg, 99% yield) as a colorless oil.  $R_f = 0.50$  (EtOAc:hexanes = 2:8);  $^1\text{H}$  NMR (500 MHz,  $\text{CDCl}_3$ ):  $\delta$  8.62 – 8.56 (m, 1H), 7.59 (td,  $J = 7.8, 1.5$  Hz, 1H), 7.32 – 7.26 (m, 2H), 7.24 – 7.19 (m, 1H), 7.17 – 7.09 (m, 5H), 7.07 (d,  $J = 8.0$  Hz, 1H), 7.00 – 6.93 (m, 2H), 5.65 (s, 1H) ppm;  $^{13}\text{C}\{^1\text{H}\}$  NMR (125 MHz,  $\text{CDCl}_3$ ):  $\delta$  163.2, 161.8 (d,  $J = 244$  Hz), 149.9, 142.9, 138.8 (d,  $J = 3$  Hz), 136.7, 131.0 (d,  $J = 8$  Hz), 129.5, 128.7, 126.9, 123.9, 121.7, 115.4 (d,  $J = 21$  Hz), 58.8 ppm; IR (thin film): 3060, 3028, 1603, 1587, 1507, 1433, 1223, 1159, 817, 748, 699  $\text{cm}^{-1}$ ; HRMS calcd. for  $\text{C}_{18}\text{H}_{15}\text{NF}^+$  264.1189, observed 264.1184 [MH]<sup>+</sup>.

### 3bc – (4-trifluoromethylphenyl)(2-pyridyl)phenylmethane

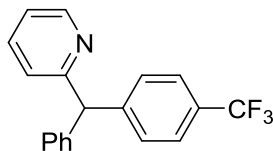

The reaction was performed following the General Procedure described above with **1b** (50.8  $\mu\text{L}$ , 0.3 mmol),  $\text{LiN}(\text{SiMe}_3)_2$  (33.5 mg, 0.2 mmol), 12-crown-4 (97.1  $\mu\text{L}$ , 0.6 mmol) and **2c** (14.0  $\mu\text{L}$ , 0.1 mmol). The crude material was purified by flash chromatography on silica gel (eluted with EtOAc:hexanes = 5:95 to 2:8) to give the product (24.5 mg, 78% yield) as a colorless oil.  $R_f = 0.5$  (EtOAc:hexanes = 2:8);  $^1\text{H}$  NMR (500 MHz,  $\text{CDCl}_3$ ):  $\delta$  8.65 – 8.57 (m, 1H), 7.62 (td,  $J = 7.5, 2.0$  Hz, 1H), 7.34 – 7.27 (m, 4H), 7.27 – 7.22 (m, 1H), 7.19 – 7.13 (m, 3H), 7.09 (d,  $J = 8.0$  Hz, 1H), 5.72 (s, 1H) ppm;  $^{13}\text{C}\{^1\text{H}\}$  NMR (125 MHz,  $\text{CDCl}_3$ ):  $\delta$  162.5, 150.0, 147.1, 142.1, 136.8, 129.9, 129.5, 128.8, 127.1, 125.5 (q,  $J = 4$  Hz), 124.0, 121.9, 59.3 ppm; IR (thin film): 1326, 1164, 1122, 1068, 700  $\text{cm}^{-1}$ ; HRMS calcd. for  $\text{C}_{19}\text{H}_{15}\text{NF}_3^+$  314.1157, observed 314.1158 [MH]<sup>+</sup>.

### 3bd – (4-methoxyphenyl)(2-pyridyl)phenylmethane

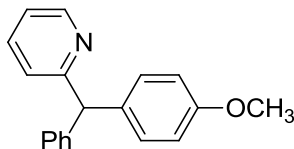

The reaction was performed following the General Procedure described above with **1b** (50.8  $\mu$ L, 0.3 mmol),  $\text{NaN}(\text{SiMe}_3)_2$  (55.1 mg, 0.3 mmol), 15-crown-5 (5.9  $\mu$ L, 0.03 mmol) and **2d** (12.5  $\mu$ L, 0.1 mmol). The crude material was purified by flash chromatography on silica gel (eluted with  $\text{CH}_2\text{Cl}_2$ , then with EtOAc:hexanes = 2:8) to give the product (27.6 mg, 99% yield) as a colorless oil.  $R_f = 0.33$  (EtOAc:hexanes = 2:8). The NMR spectral data match the previously published data.<sup>6</sup>

### 3be – (4-*N,N*-dimethylaminophenyl)(2-pyridyl)phenylmethane

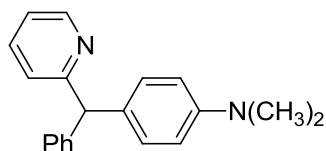

The reaction was performed following the General Procedure described above with **1b** (50.8  $\mu$ L, 0.3 mmol),  $\text{NaN}(\text{SiMe}_3)_2$  (55.0 mg, 0.3 mmol), 15-crown-5 (5.9  $\mu$ L, 0.03 mmol) and **2e** (20.0 mg, 0.1 mmol). The crude material was purified by flash chromatography on silica gel (eluted with EtOAc:hexanes = 1:9 to 2:8) to give the product (27.0 mg, 94% yield) as a white solid.  $R_f = 0.3$  (EtOAc:hexanes = 2:8); m.p. = 94–96  $^\circ\text{C}$ ;  $^1\text{H}$  NMR (500 MHz,  $\text{CDCl}_3$ ):  $\delta$  8.60 – 8.54 (m, 1H), 7.56 (td,  $J = 7.5, 2.0$  Hz, 1H), 7.30 – 7.24 (m, 2H), 7.22 – 7.13 (m, 3H), 7.12 – 7.06 (m, 2H), 7.03 (d,  $J = 9.0$  Hz, 2H), 6.67 (d,  $J = 8.5$  Hz, 2H), 5.61 (s, 1H), 2.90 (s, 6H) ppm;  $^{13}\text{C}\{^1\text{H}\}$  NMR (125 MHz,  $\text{CDCl}_3$ ):  $\delta$  164.2, 149.6, 149.4, 143.7, 136.5, 130.9, 130.1, 129.5, 128.5, 126.4, 123.8, 121.4, 112.8, 58.7, 40.8 ppm; IR (thin film): 2885, 2800, 1614, 1587, 1520, 1432, 1349, 748, 699  $\text{cm}^{-1}$ ; HRMS calcd. for  $\text{C}_{20}\text{H}_{21}\text{N}_2^+$  289.1705, observed 289.1711  $[\text{MH}]^+$ .

### 3bf – (1-naphthyl)(2-pyridyl)phenylmethane

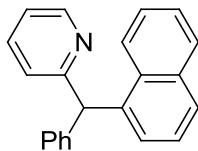

The reaction was performed following the General Procedure described above with **1b** (50.8  $\mu$ L, 0.3 mmol),  $\text{NaN}(\text{SiMe}_3)_2$  (55.1 mg, 0.3 mmol), 15-crown-5 (5.9  $\mu$ L, 0.03 mmol) and **2f** (14.0  $\mu$ L, 0.1 mmol). The crude material was purified by flash chromatography on silica gel (eluted with hexanes to EtOAc:hexanes = 1:9) to give the product (29.3 mg, 99% yield) as a white solid.  $R_f = 0.25$  (EtOAc:hexanes = 1:9); m.p. = 119–121  $^\circ\text{C}$ ;  $^1\text{H}$  NMR (500 MHz,  $\text{CDCl}_3$ ):  $\delta$  8.65 – 8.56 (m, 1H), 7.99 (d,  $J = 8.5$  Hz, 1H), 7.83 (d,  $J = 8.0$  Hz, 1H), 7.74 (d,  $J = 8.0$  Hz, 1H), 7.52 (td,  $J = 7.8, 2.0$  Hz, 1H), 7.44 – 7.32 (m, 3H), 7.32 – 7.25 (m, 2H), 7.25 – 7.18 (m, 1H), 7.17 – 7.07 (m, 3H), 6.98 (d,  $J = 7.5$  Hz, 2H), 6.45 (s, 1H) ppm;  $^{13}\text{C}\{^1\text{H}\}$  NMR (125 MHz,  $\text{CDCl}_3$ ):  $\delta$  163.5, 149.9, 142.7, 139.2, 136.6, 134.3, 132.3, 129.9, 128.9, 128.7, 127.7, 127.5, 126.8, 126.4, 125.7, 125.5, 124.5, 124.2, 121.6, 56.2 ppm; IR (thin

film): 3059, 1587, 1466, 1432, 789, 775, 728, 700  $\text{cm}^{-1}$ ; HRMS calcd. for  $\text{C}_{22}\text{H}_{18}\text{N}^+$  296.1439, observed 296.1443  $[\text{MH}]^+$ .

### 3bg – (4-cyanophenyl)(2-pyridyl)phenylmethane

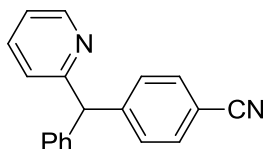

The reaction was performed following the General Procedure described above with **1b** (19.3  $\mu\text{L}$ , 0.12 mmol),  $\text{LiN}(\text{SiMe}_3)_2$  (50.2 mg, 0.3 mmol), 12-crown-4 (97.1  $\mu\text{L}$ , 0.6 mmol) and **2g** (18.2 mg, 0.1 mmol). The crude material was purified by flash chromatography on silica gel (eluted with EtOAc:hexanes = 1:9 to 2:8) to give the product (23.1 mg, 86% yield) as a colorless oil.  $R_f = 0.2$  (EtOAc:hexanes = 2:8);  $^1\text{H}$  NMR (500 MHz,  $\text{CDCl}_3$ ):  $\delta$  8.63 – 8.58 (m, 1H), 7.64 (td,  $J = 7.8, 2.0$  Hz, 1H), 7.60 – 7.56 (m, 2H), 7.35 – 7.24 (m, 5H), 7.20 – 7.13 (m, 3H), 7.09 (d,  $J = 8.0$  Hz, 1H), 5.70 (s, 1H) ppm;  $^{13}\text{C}\{^1\text{H}\}$  NMR (125 MHz,  $\text{CDCl}_3$ ):  $\delta$  161.9, 150.0, 148.6, 141.5, 137.0, 132.4, 130.4, 129.4, 128.9, 127.3, 124.0, 122.1, 119.1, 110.6, 59.4 ppm; IR (thin film): 3062, 2227, 1587, 1433  $\text{cm}^{-1}$ ; HRMS calcd. for  $\text{C}_{19}\text{H}_{15}\text{N}_2^+$  271.1235, observed 271.1233  $[\text{MH}]^+$ .

### 3bi – 2,2'-(phenylmethylene)dipyridine

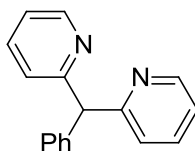

The reaction was performed following the General Procedure described above with **1b** (19.3  $\mu\text{L}$ , 0.12 mmol),  $\text{NaN}(\text{SiMe}_3)_2$  (55.0 mg, 0.3 mmol), HMTETA (163.2  $\mu\text{L}$ , 0.6 mmol) and **2i** (9.5  $\mu\text{L}$ , 0.1 mmol). The crude material was purified by flash chromatography on silica gel (eluted with hexanes to EtOAc:hexanes = 6:4 to EtOAc) to give the product (23.7 mg, 96% yield) as a white solid.  $R_f = 0.45$  (EtOAc). The NMR spectral data match the previously published data.<sup>7</sup>

### 3ca – (4-tert-butylphenyl)(4-methoxyphenyl)phenylmethane

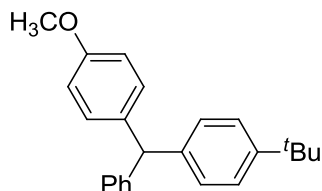

The reaction was performed following the General Procedure described above with **1c** (19.8  $\mu\text{L}$ , 0.12 mmol),  $\text{LiN}(\text{SiMe}_3)_2$  (50.2 mg, 0.3 mmol), 12-crown-4 (97.1  $\mu\text{L}$ , 0.6 mmol) and **2a** (17.3  $\mu\text{L}$ , 0.1 mmol). The crude material was purified by flash chromatography on silica gel (eluted with  $\text{CH}_2\text{Cl}_2$ :hexanes = 4:96 to 15:85) to give the product (17.3 mg, 52% yield) as a light yellow oil.  $R_f = 0.25$  (EtOAc:hexanes = 2:98);  $^1\text{H}$  NMR (500 MHz,  $\text{CDCl}_3$ ):  $\delta$  7.31 –



7.23 (m, 4H), 7.22 – 7.16 (m, 1H), 7.14 – 7.09 (m, 2H), 7.06 – 7.00 (m, 4H), 6.84 – 6.78 (m, 2H), 5.45 (s, 1H), 3.77 (s, 3H), 1.30 (s, 9H) ppm;  $^{13}\text{C}\{^1\text{H}\}$  NMR (125 MHz,  $\text{CDCl}_3$ ):  $\delta$  158.2, 149.2, 144.8, 141.3, 136.6, 130.6, 129.6, 129.1, 128.4, 126.3, 125.3, 113.9, 55.8, 55.4, 34.6, 31.6 ppm; IR (thin film): 2961, 1608, 1509, 1248, 1177, 1036, 822, 701  $\text{cm}^{-1}$ ; HRMS calcd. for  $\text{C}_{24}\text{H}_{26}\text{O}^+$  330.1984, observed 330.1980  $[\text{M}]^+$ .

### 3cd – (4-methoxyphenyl)(4-methoxyphenyl)phenylmethane

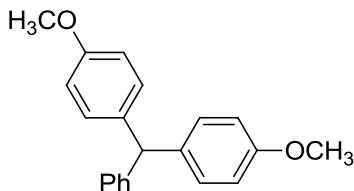

The reaction was performed following the General Procedure described above with **1c** (19.8  $\mu\text{L}$ , 0.12 mmol),  $\text{LiN}(\text{SiMe}_3)_2$  (50.2 mg, 0.3 mmol), 12-crown-4 (97.1  $\mu\text{L}$ , 0.6 mmol) and **2d** (12.5  $\mu\text{L}$ , 0.1 mmol). The crude material was purified by flash chromatography on silica gel (eluted with hexanes to EtOAc:hexanes = 2:98) to give the product (14.4 mg, 55% yield) as a colorless oil.  $R_f$  = 0.25 (EtOAc:hexanes = 5:95). The NMR spectral data match the previously published data.<sup>8</sup>

### 3ce – (4-*N,N*-dimethylaminophenyl)(4-methoxyphenyl)phenylmethane

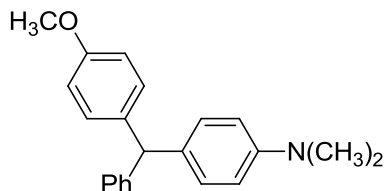

The reaction was performed following the General Procedure described above with **1c** (19.8  $\mu\text{L}$ , 0.12 mmol),  $\text{LiN}(\text{SiMe}_3)_2$  (50.0 mg, 0.3 mmol), 12-crown-4 (97.1  $\mu\text{L}$ , 0.6 mmol) and **2e** (20.0 mg, 0.1 mmol). The crude material was purified by flash chromatography on silica gel (eluted with hexanes to EtOAc:hexanes = 5:95) to give the product (19.5 mg, 61% yield) as a colorless oil.  $R_f$  = 0.25 (EtOAc:hexanes = 5:95). The NMR spectral data match the previously published data.<sup>3</sup>

### 3cf – (1-naphthyl)(4-methoxyphenyl)phenylmethane

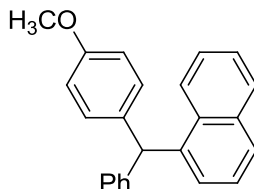

The reaction was performed following the General Procedure described above with **1c** (19.8  $\mu\text{L}$ , 0.12 mmol),  $\text{LiN}(\text{SiMe}_3)_2$  (50.2 mg, 0.3 mmol), 12-crown-4 (97.1  $\mu\text{L}$ , 0.6 mmol) and **2f** (14.0  $\mu\text{L}$ , 0.1 mmol). The crude material was purified by flash chromatography on silica gel (eluted with hexanes to EtOAc:hexanes = 2:98) to give the product (20.3 mg, 63% yield) as a colorless oil.  $R_f$  = 0.16 (EtOAc:hexanes = 2:98);  $^1\text{H}$  NMR (500 MHz,  $\text{CDCl}_3$ ):  $\delta$  7.98 (d,  $J$  = 8.5 Hz, 1H), 7.85 (d,  $J$  = 7.5 Hz, 1H), 7.74 (d,  $J$  = 8.5 Hz, 1H), 7.45 – 7.32 (m, 3H), 7.30 – 7.26 (m, 2H),

7.24 – 7.18 (m, 1H), 7.11 (d,  $J = 7.5$  Hz, 2H), 7.02 (d,  $J = 8.5$  Hz, 2H), 6.94 (d,  $J = 7.0$  Hz, 1H), 6.82 (d,  $J = 9.0$  Hz, 2H), 6.22 (s, 1H), 3.78 (s, 3H) ppm;  $^{13}\text{C}\{^1\text{H}\}$  NMR (125 MHz,  $\text{CDCl}_3$ ):  $\delta$  158.3, 144.3, 140.4, 136.1, 134.1, 132.1, 130.8, 129.8, 128.9, 128.6, 127.7, 127.4, 126.5, 126.3, 125.6, 125.4, 124.6, 114.0, 55.4, 52.5 ppm; IR (thin film): 3058, 2931, 2834, 1609, 1509, 1248, 1178, 1032, 785, 731  $\text{cm}^{-1}$ ; HRMS calcd. for  $\text{C}_{24}\text{H}_{20}\text{O}^+$  324.1514, observed 324.1520  $[\text{M}]^+$ .

### 3da – (4-*tert*-butylphenyl)(4-fluorophenyl)phenylmethane

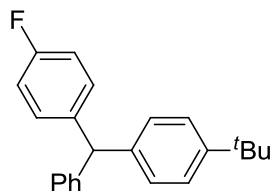

The reaction was performed following the General Procedure described above with **1d** (18.6  $\mu\text{L}$ , 0.12 mmol),  $\text{NaN}(\text{SiMe}_3)_2$  (55.1 mg, 0.3 mmol), HMTETA (163.2  $\mu\text{L}$ , 0.6 mmol) and **2a** (17.3  $\mu\text{L}$ , 0.1 mmol). The crude material was purified by flash chromatography on silica gel (eluted with hexanes) to give the product (30.3 mg, 99% yield) as a colorless oil.  $R_f = 0.33$  (hexanes). The NMR spectral data match the previously published data.<sup>3</sup>

### 3db – (4-fluorophenyl)(4-fluorophenyl)phenylmethane

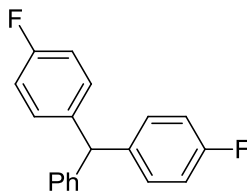

The reaction was performed following the General Procedure described above with **1d** (18.6  $\mu\text{L}$ , 0.12 mmol),  $\text{LiN}(\text{SiMe}_3)_2$  (50.2 mg, 0.3 mmol), 12-crown-4 (97.1  $\mu\text{L}$ , 0.6 mmol) and **2b** (11.0  $\mu\text{L}$ , 0.1 mmol). The crude material was purified by flash chromatography on silica gel (eluted with hexanes) to give the product (21.1 mg, 76% yield) as a colorless oil.  $R_f = 0.33$  (hexanes);  $^1\text{H}$  NMR (500 MHz,  $\text{CDCl}_3$ ):  $\delta$  7.32 – 7.26 (m, 2H), 7.26 – 7.20 (m, 1H), 7.09 – 7.01 (m, 6H), 7.00 – 6.93 (m, 4H), 5.51 (s, 1H) ppm;  $^{13}\text{C}\{^1\text{H}\}$  NMR (125 MHz,  $\text{CDCl}_3$ ):  $\delta$  161.7 (d,  $J = 244$  Hz), 143.7, 139.7 (d,  $J = 3$  Hz), 131.0 (d,  $J = 8$  Hz), 129.4, 128.7, 126.8, 115.4 (d,  $J = 21$  Hz), 55.4 ppm; IR (thin film): 3029, 1603, 1508, 1224, 1157, 826, 700  $\text{cm}^{-1}$ ; HRMS calcd. for  $\text{C}_{19}\text{H}_{14}\text{F}_2^+$  280.1064, observed 280.1059  $[\text{M}]^+$ .

### 3dd (= 3cb) – (4-methoxyphenyl)(4-fluorophenyl)phenylmethane

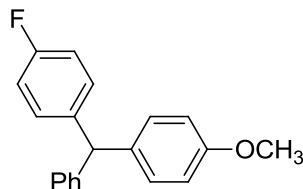

The reaction was performed following the General Procedure described above with **1d** (55.8  $\mu\text{L}$ , 0.3 mmol),  $\text{NaN}(\text{SiMe}_3)_2$  (54.9 mg, 0.3 mmol), 15-crown-5 (5.9  $\mu\text{L}$ , 0.03 mmol) and **2d** (12.5  $\mu\text{L}$ , 0.1 mmol) or **1c** (19.8  $\mu\text{L}$ , 0.12 mmol),  $\text{LiN}(\text{SiMe}_3)_2$  (50.2 mg, 0.3 mmol), 12-crown-4 (97.1  $\mu\text{L}$ , 0.6 mmol) and **2b** (11.0  $\mu\text{L}$ , 0.1 mmol). The

crude material was purified by flash chromatography on silica gel (eluted with hexanes to EtOAc:hexanes = 2:98) to give the product (28.9 mg, 99% yield and 14.8 mg, 51% yield respectively) as a colorless oil.  $R_f = 0.33$  (EtOAc:hexanes = 2:98);  $^1\text{H NMR}$  (500 MHz,  $\text{CDCl}_3$ ):  $\delta$  7.32 – 7.26 (m, 2H), 7.24 – 7.18 (m, 1H), 7.11 – 7.03 (m, 4H), 7.03 – 6.93 (m, 4H), 6.85 – 6.80 (m, 2H), 5.48 (s, 1H), 3.78 (s, 3H) ppm;  $^{13}\text{C}\{^1\text{H}\}$  NMR (125 MHz,  $\text{CDCl}_3$ ):  $\delta$  161.6 (d,  $J = 243$  Hz), 158.3, 144.3, 140.2 (d,  $J = 3$  Hz), 136.1, 131.0 (d,  $J = 8$  Hz), 130.5, 129.5, 128.6, 126.6, 115.3 (d,  $J = 21$  Hz), 113.9, 55.45, 55.41 ppm; IR (thin film): 3028, 2836, 1606, 1506, 1248, 1034, 824, 700  $\text{cm}^{-1}$ ; HRMS calcd. for  $\text{C}_{20}\text{H}_{16}\text{FO}^+$  291.1185, observed 291.1189  $[\text{M}-\text{H}]^+$ .

### 3de – (4-methoxyphenyl)(4-fluorophenyl)phenylmethane

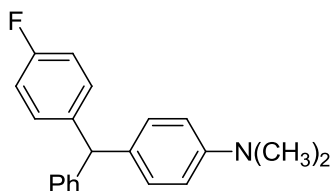

The reaction was performed following the General Procedure described above with **1d** (55.8  $\mu\text{L}$ , 0.3 mmol),  $\text{NaN}(\text{SiMe}_3)_2$  (54.9 mg, 0.3 mmol), 15-crown-5 (5.9  $\mu\text{L}$ , 0.03 mmol) and **2e** (20.0 mg, 0.1 mmol). The crude material was purified by flash chromatography on silica gel (eluted with EtOAc:hexanes = 2:98 to 5:95) to give the product (30.2 mg, 99% yield) as a colorless oil.  $R_f = 0.33$  (EtOAc:hexanes = 5:95);  $^1\text{H NMR}$  (500 MHz,  $\text{CDCl}_3$ ):  $\delta$  7.30 – 7.24 (m, 2H), 7.22 – 7.16 (m, 1H), 7.12 – 7.04 (m, 4H), 6.97 – 6.91 (m, 4H), 6.69 – 6.64 (m, 2H), 5.43 (s, 1H), 2.91 (s, 6H) ppm;  $^{13}\text{C}\{^1\text{H}\}$  NMR (125 MHz,  $\text{CDCl}_3$ ):  $\delta$  161.5 (d,  $J = 243$  Hz), 149.3, 144.7, 140.6 (d,  $J = 3$  Hz), 131.9, 131.0 (d,  $J = 8$  Hz), 130.1, 129.5, 128.5, 126.4, 115.1 (d,  $J = 21$  Hz), 112.7, 55.3, 40.8 ppm; IR (thin film): 3026, 2883, 2800, 1614, 1520, 1506, 1350, 1222, 816, 701  $\text{cm}^{-1}$ ; HRMS calcd. for  $\text{C}_{21}\text{H}_{20}\text{NF}^+$  305.1580, observed 305.1577  $[\text{M}]^+$ .

### 3df – (1-naphthyl)(4-fluorophenyl)phenylmethane

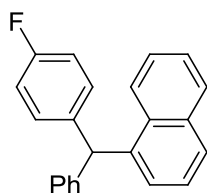

The reaction was performed following the General Procedure described above with **1d** (18.6  $\mu\text{L}$ , 0.12 mmol),  $\text{LiN}(\text{SiMe}_3)_2$  (50.1 mg, 0.3 mmol), 12-crown-4 (97.1  $\mu\text{L}$ , 0.6 mmol) and **2e** (14.0  $\mu\text{L}$ , 0.1 mmol). The crude material was purified by flash chromatography on silica gel (eluted with hexanes to EtOAc:hexanes = 2:98) to give the product (27.4 mg, 88% yield) as a yellow oil.  $R_f = 0.33$  (EtOAc:hexanes = 2:98);  $^1\text{H NMR}$  (500 MHz,  $\text{CDCl}_3$ ):  $\delta$  7.94 (d,  $J = 8.5$  Hz, 1H), 7.85 (d,  $J = 8.0$  Hz, 1H), 7.75 (d,  $J = 8.0$  Hz, 1H), 7.46 – 7.33 (m, 3H), 7.31 – 7.25 (m, 2H), 7.25 – 7.19 (m, 1H), 7.12 – 7.03 (m, 4H), 6.99 – 6.88 (m, 3H), 6.24 (s, 1H) ppm;  $^{13}\text{C}\{^1\text{H}\}$  NMR (125 MHz,  $\text{CDCl}_3$ ):  $\delta$  161.7 (d,  $J = 243$  Hz), 143.8, 139.9, 139.6 (d,  $J = 3$  Hz), 134.2, 132.0, 131.2 (d,  $J = 8$  Hz), 129.8, 129.0, 128.7, 127.72, 127.68, 126.7, 126.4, 125.7, 125.4, 124.4, 115.4 (d,  $J = 21$  Hz), 52.6 ppm; IR (thin film): 3059, 1600, 1506, 1223, 1158, 780, 733, 699  $\text{cm}^{-1}$ ; HRMS calcd. for  $\text{C}_{23}\text{H}_{17}\text{F}^+$  312.1314, observed 312.1313  $[\text{M}]^+$ .

### 3dg– (4-cyanophenyl)(4-fluorophenyl)phenylmethane

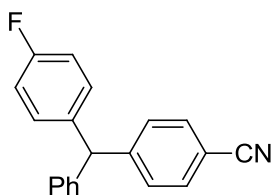

The reaction was performed following the General Procedure described above with **1d** (55.8  $\mu\text{L}$ , 0.3 mmol),  $\text{NaN}(\text{SiMe}_3)_2$  (55.1 mg, 0.3 mmol), 15-crown-5 (5.9  $\mu\text{L}$ , 0.03 mmol) and **2g** (18.2 mg, 0.1 mmol). The crude material was purified by flash chromatography on silica gel (eluted with EtOAc:hexanes = 5:95) to give the product (7.5 mg, 26% yield) as a colorless oil.  $R_f = 0.2$  (EtOAc:hexanes = 5:95);  $^1\text{H}$  NMR (500 MHz,  $\text{CDCl}_3$ ):  $\delta$  7.58 (d,  $J = 8.5$  Hz, 2H), 7.32 (t,  $J = 7.5$  Hz, 2H), 7.28 – 7.24 (m, 1H), 7.21 (d,  $J = 8.5$  Hz, 2H), 7.08 – 6.96 (m, 6H), 5.56 (s, 1H) ppm;  $^{13}\text{C}\{^1\text{H}\}$  NMR (125 MHz,  $\text{CDCl}_3$ ):  $\delta$  161.9 (d,  $J = 245$  Hz), 149.5, 142.4, 138.4 (d,  $J = 3$  Hz), 132.5, 131.0 (d,  $J = 8$  Hz), 130.3, 129.4, 128.9, 127.2, 119.0, 115.7 (d,  $J = 21$  Hz), 110.7, 56.2 ppm; IR (thin film): 3030, 2228, 1607, 1507, 1224, 1159, 826, 738, 701  $\text{cm}^{-1}$ ; HRMS calcd. for  $\text{C}_{20}\text{H}_{15}\text{NF}^+$  288.1189, observed 288.1194  $[\text{MH}]^+$ .

### 3di– (2-pyridyl)(4-fluorophenyl)phenylmethane

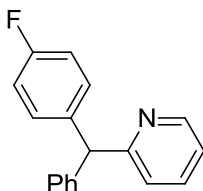

The reaction was performed following the General Procedure described above with **1d** (18.6  $\mu\text{L}$ , 0.12 mmol),  $\text{LiN}(\text{SiMe}_3)_2$  (50.2 mg, 0.3 mmol), 12-crown-4 (97.1  $\mu\text{L}$ , 0.6 mmol) and **2i** (9.5  $\mu\text{L}$ , 0.1 mmol). The crude material was purified by flash chromatography on silica gel (eluted with EtOAc:hexanes = 5:95 to 1:9) to give the product (22.4 mg, 85% yield) as a colorless oil.  $R_f = 0.45$  (EtOAc:hexanes = 2:8);  $^1\text{H}$  NMR (500 MHz,  $\text{CDCl}_3$ ):  $\delta$  8.62 – 8.56 (m, 1H), 7.60 (td,  $J = 7.8, 2.0$  Hz, 1H), 7.30 (t,  $J = 7.5$  Hz, 2H), 7.23 (t,  $J = 7.5$  Hz, 1H), 7.16 – 7.10 (m, 5H), 7.07 (d,  $J = 8.0$  Hz, 1H), 7.01 – 6.94 (m, 2H), 5.67 (s, 1H) ppm;  $^{13}\text{C}\{^1\text{H}\}$  NMR (125 MHz,  $\text{CDCl}_3$ ):  $\delta$  163.2, 161.8 (d,  $J = 244$  Hz), 149.8, 142.8, 138.7 (d,  $J = 3$  Hz), 136.7, 131.0 (d,  $J = 8$  Hz), 129.5, 128.7, 126.9, 123.9, 121.7, 115.4 (d,  $J = 21$  Hz), 58.7 ppm; IR (thin film): 3060, 2895, 1587, 1507, 1432, 1222, 1158, 1098, 817, 748, 699  $\text{cm}^{-1}$ ; HRMS calcd. for  $\text{C}_{18}\text{H}_{15}\text{NF}^+$  264.1189, observed 264.1183  $[\text{MH}]^+$ .

## High-throughput Experimentation Screenings.

### General Experimental:

Set up:

Experiments were set up inside a glovebox under a nitrogen atmosphere. A 96-well aluminum block containing 1 mL glass vials was pre-dosed with Pd(OAc)<sub>2</sub> (0.5 μmol) and NiXantphos (1 μmol) in THF. The solvent was removed to dryness using a J-Kem blow down block and the corresponding base (30 μmol) and additive (60 μmol for 12-crown-4, HMTETA and dilgyme and 3 μmol for 15-crown-5) in THF were added to the ligand/catalyst mixture. The solvent was removed on the J-Kem blow down block and a parylene stir bar was then added to each reaction vial. The aryl bromide (10 μmol/reaction), diarylmethane (30 μmol/reaction when using NaN(SiMe<sub>3</sub>)<sub>2</sub>/15-crown-5 and 12 μmol/reaction for all other cases) and biphenyl (1 μmol/reaction) (used as an internal standard to measure HPLC yields) were then dosed together into each reaction vial as a solution in CPME (100 μL, 0.1 M). The 96-well plate was then sealed and stirred for 18 h at rt.

Work up:

Upon opening the plate to air, 500 μL of acetonitrile was added into each vial. The plate was covered again and the vials stirred for 10 min. to ensure good homogenization. Into a separate 96-well LC block was added 700 μL of acetonitrile, followed by 40 μL of the diluted reaction mixtures. The LC block was then sealed with a silicon-rubber storage mat and mounted on an automated HPLC instrument for analysis.

### (1) Additive and Base Screening:

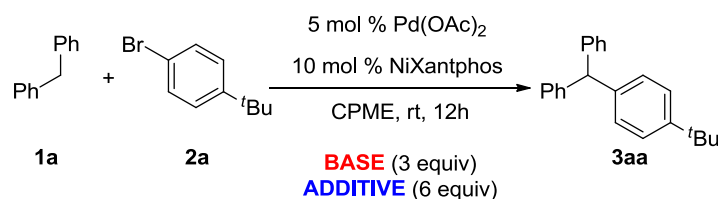

Bases: KN(SiMe<sub>3</sub>)<sub>2</sub>, LiN(SiMe<sub>3</sub>)<sub>2</sub>, NaN(SiMe<sub>3</sub>)<sub>2</sub>, KOtBu, LiOtBu, NaOtBu.

Additives: 12-crown-4, 15-crown-5, 18-crown-6, NEt<sub>3</sub>, TMEDA, *N,N,N',N'*-tetramethyl-1,3-propanediamine (TMPDA), *N,N'*-diisopropylethylenediamine, *N,N*-diethylethylenediamine, *N,N'*-dibenzylethylenediamine (DBED), *N,N,N',N'',N'''*-pentamethyldiethylenetriamine (PMDTA), 2,2'-bipyridine (bipy), 1,10-phenanthroline and 1,4-diazabicyclo[2.2.2]octane (DABCO).

| Additives                               | Bases (AY % 3aa)                    |                                      |                                      |       |        |        |
|-----------------------------------------|-------------------------------------|--------------------------------------|--------------------------------------|-------|--------|--------|
|                                         | KN(SiMe <sub>3</sub> ) <sub>2</sub> | LiN(SiMe <sub>3</sub> ) <sub>2</sub> | NaN(SiMe <sub>3</sub> ) <sub>2</sub> | KOtBu | LiOtBu | NaOtBu |
| Control                                 | 95                                  | 0                                    | 0                                    | 0     | 0      | 0      |
| crown ether                             | 25                                  | 97                                   | 91                                   | 0     | 0      | 5      |
| NEt <sub>3</sub>                        | 80                                  | 0                                    | 0                                    | 0     | 0      | 0      |
| TMEDA                                   | 89                                  | 6                                    | 10                                   | 0     | 0      | 2      |
| TMPDA                                   | 79                                  | 0                                    | 0                                    | 0     | 0      | 0      |
| <i>N,N'</i> -diisopropylethylenediamine | 40                                  | 2                                    | 10                                   | 0     | 0      | 3      |
| <i>N,N</i> -diethylethylenediamine      | 0                                   | 0                                    | 0                                    | 0     | 0      | 0      |
| DBED                                    | 0                                   | 0                                    | 0                                    | 0     | 0      | 0      |
| PMDTA                                   | 68                                  | 8                                    | 12                                   | 0     | 0      | 5      |
| Bipy                                    | 70                                  | 0                                    | 0                                    | 0     | 0      | 0      |
| 1,10-phenanthroline                     | 71                                  | 0                                    | 0                                    | 0     | 0      | 0      |
| DABCO                                   | 71                                  | 0                                    | 0                                    | 0     | 0      | 0      |

The lead hits from the screening were LiN(SiMe<sub>3</sub>)<sub>2</sub>/12-crown-4 giving 97% assay yield **3aa**, NaN(SiMe<sub>3</sub>)<sub>2</sub>/15-crown-5 rendering product in 91% assay yield and NaN(SiMe<sub>3</sub>)<sub>2</sub>/TMEDA, NaN(SiMe<sub>3</sub>)<sub>2</sub>/*N,N'*-diisopropylethylenediamine and NaN(SiMe<sub>3</sub>)<sub>2</sub>/PMDTA generating the triarylmethane compound in 10-12% assay yield.

## (2) Additive Loading and Temperature Screening

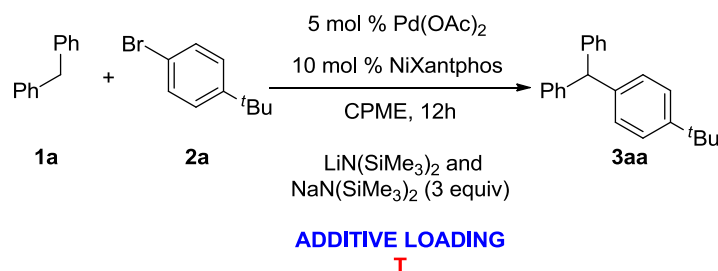

Bases: LiN(SiMe<sub>3</sub>)<sub>2</sub>, NaN(SiMe<sub>3</sub>)<sub>2</sub>.

Additives/Additives loading: 12-crown-4, 15-crown-5, TMEDA, *N,N'*-diisopropylethylenediamine and PMDTA using 1, 2, 3, 6 and 8 equiv.

| Base                                 | Additive, loading                               | T (°C) | AY (%) 3aa |
|--------------------------------------|-------------------------------------------------|--------|------------|
| NaN(SiMe <sub>3</sub> ) <sub>2</sub> | 15-crown-5 6 equiv                              | 23     | 91         |
|                                      | 15-crown-5 1 equiv                              | 23     | 68         |
|                                      | <i>N,N'</i> -diisopropylethylenediamine 6 equiv | 23     | 2          |
|                                      |                                                 | 110    | 15         |
|                                      | <i>N,N'</i> -diisopropylethylenediamine 2 equiv | 23     | 2          |
|                                      |                                                 | 110    | 11         |
|                                      | TMEDA 8 equiv                                   | 23     | 5          |
|                                      |                                                 | 110    | 24         |
|                                      | TMEDA 6 equiv                                   | 23     | 7          |
|                                      |                                                 | 110    | 32         |
| TMEDA 3 equiv                        | 23                                              | 4      |            |

|                                      |                    |     |    |
|--------------------------------------|--------------------|-----|----|
|                                      |                    | 110 | 28 |
|                                      | TMEDA 2 equiv      | 23  | 3  |
|                                      |                    | 110 | 27 |
|                                      | TMEDA 1 equiv      | 23  | 2  |
|                                      |                    | 110 | 27 |
|                                      | PMDTA 6 equiv      | 23  | 4  |
|                                      |                    | 110 | 31 |
|                                      | PMDTA 3 equiv      | 23  | 9  |
|                                      |                    | 110 | 32 |
|                                      | PMDTA 1 equiv      | 23  | 3  |
|                                      | 110                | 45  |    |
| LiN(SiMe <sub>3</sub> ) <sub>2</sub> | 12-crown-4 6 equiv | 23  | 97 |
|                                      | 12-crown-4 1 equiv | 23  | 79 |

Conclusions from the screening: loading of the crown ethers could be reduced from 6 equiv to 1 equiv without a dramatic impact in the reaction yield at rt although yields obtained were lower. PMDTA was more promising than TMEDA and *N,N'*-diisopropylethylenediamine at 110 °C. 1 equiv PMDTA rendered **3aa** in 45% assay yield while 6 equiv TMEDA generated the product in 32% assay yield.

### (3) Tetramine Loading and Temperature Screening

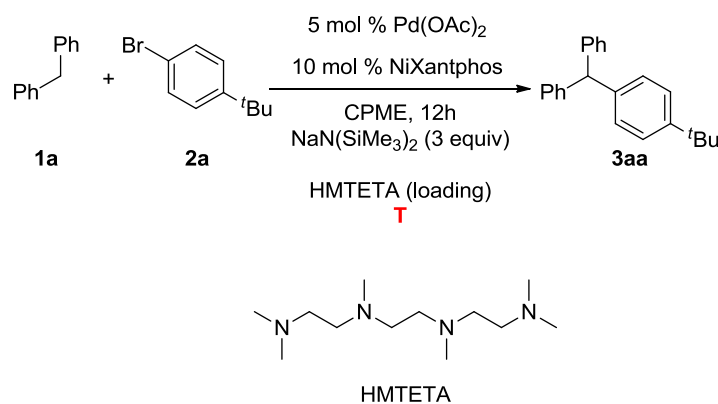

Tetramines: HMTETA (30 mol %, 1 equiv, 3 equiv and 6 equiv).

| Base                                 | Additive, loading | T (°C) | 1a loading | AY (%) 3aa |
|--------------------------------------|-------------------|--------|------------|------------|
| NaN(SiMe <sub>3</sub> ) <sub>2</sub> | HMTETA 6 equiv    | 23     | 1.2 equiv  | 80         |
|                                      |                   | 110    | 1.2 equiv  | 73         |
|                                      |                   | 23     | 3 equiv    | 97         |
|                                      |                   | 110    | 1.2 equiv  | 83         |
|                                      | HMTETA 3 equiv    | 23     | 1.2 equiv  | 23         |
|                                      |                   | 110    | 1.2 equiv  | 73         |
|                                      | HMTETA 1 equiv    | 23     | 3 equiv    | 15         |
|                                      | HMTETA 30 mol%    | 23     | 3 equiv    | 4          |

The lead hit from the screening was the combination of NaN(SiMe<sub>3</sub>)<sub>2</sub>/6 equiv HMTETA at rt affording 80% assay yield of the desired DCCP product **3aa** when 1.2 equiv **1a** were used and 97% assay yield when 3 equiv **1a** were used.

#### (4) Base, Solvent, Temperature and Additive loading Screening

Base: KN(SiMe<sub>3</sub>)<sub>2</sub>, LiN(SiMe<sub>3</sub>)<sub>2</sub>, NaN(SiMe<sub>3</sub>)<sub>2</sub>, KO<sup>t</sup>Bu, LiO<sup>t</sup>Bu, NaO<sup>t</sup>Bu.

Solvent: CPME, DME, diglyme.

Temperature: rt, 50 °C, 110 °C.

Additives: 12-crown-4, 15-crown-5, 18-crown-6, TMEDA, PMDTA, HMTETA, diglyme.

#### NaN(SiMe<sub>3</sub>)<sub>2</sub>

*No additive:*

| Base                                 | Solvent | T (°C) | AY (%) 3aa |
|--------------------------------------|---------|--------|------------|
| NaN(SiMe <sub>3</sub> ) <sub>2</sub> | CPME    | 23     | NR         |
|                                      |         | 50     | NR         |
|                                      |         | 110    | 35         |
|                                      | DME     | 23     | 40         |
|                                      |         | 110    | 70         |
|                                      | diglyme | 23     | 54         |
|                                      |         | 110    | 92         |

Although diglyme as coordinating solvent rendered good results at high temperature, diglyme's toxicity and high boiling point made us consider its role as an additive.

*In the presence of additives:*

*15-crown-5 in CPME:*

|                                      | Loading (equiv) | T (°C) | 1a loading (equiv) | AY (%) 3aa |
|--------------------------------------|-----------------|--------|--------------------|------------|
| NaN(SiMe <sub>3</sub> ) <sub>2</sub> | 6 equiv         | 23     | 1.2                | 91         |
|                                      | 1 equiv         | 23     | 1.2                | 68         |
|                                      |                 | 23     | 3                  | 79         |
|                                      |                 | 110    | 1.2                | 83         |
|                                      |                 | 110    | 3                  | 87         |
|                                      | 0.03 equiv      | 23     | 1.2                | 54         |
|                                      |                 | 23     | 3                  | 102        |
|                                      |                 | 50     | 1.2                | 90         |
|                                      |                 | 110    | 3                  | 74         |
|                                      | 0.015 equiv     | 23     | 1.2                | 41         |
|                                      |                 | 23     | 3                  | 54         |
|                                      |                 | 50     | 1.2                | 74         |
|                                      |                 | 110    | 3                  | 79         |
|                                      | 0.003 equiv     | 23     | 1.2                | NR         |
|                                      |                 | 23     | 3                  | 3          |
|                                      |                 | 50     | 1.2                | 17         |
| 110                                  |                 | 3      | 67                 |            |

Best hit: NaN(SiMe<sub>3</sub>)<sub>2</sub>/0.03 equiv 15-crown-5, 3 equiv **1a** in CPME at rt generated the desired product in quantitative assay yield.



**HMTETA in different solvents:**

| Base                                 | Loading (equiv) | Solvent | T (°C) | 1a loading (equiv) | AY (%) 3aa |    |
|--------------------------------------|-----------------|---------|--------|--------------------|------------|----|
| NaN(SiMe <sub>3</sub> ) <sub>2</sub> | 6 equiv         | CPME    | 23     | 1.2                | 80         |    |
|                                      |                 |         | 23     | 3                  | 97         |    |
|                                      | 3 equiv         | diglyme | 23     | 1.2                | 56         |    |
|                                      |                 |         | CPME   | 23                 | 1.2        | 23 |
|                                      |                 |         |        | 50                 | 1.2        | 76 |
|                                      | 1 equiv         | DME     | 23     | 1.2                | 42         |    |
|                                      |                 |         | CPME   | 23                 | 3          | 15 |
|                                      | 0.03 equiv      | CPME    |        | 23                 | 3          | 4  |
| 110                                  |                 |         | 1.2    | 65                 |            |    |

Best hit: NaN(SiMe<sub>3</sub>)<sub>2</sub>/6 equiv HMTETA, 1.2 equiv **1a** in CPME at rt generated the desired product in 80% assay yield.

**Diglyme in CPME:**

| Base                                 | Loading (equiv) | T (°C) | 1a loading (equiv) | AY (%) 3aa |
|--------------------------------------|-----------------|--------|--------------------|------------|
| NaN(SiMe <sub>3</sub> ) <sub>2</sub> | 6 equiv         | 23     | 1.2                | 88         |
|                                      |                 | 23     | 3                  | 97         |
|                                      | 3 equiv         | 23     | 1.2                | 41         |
|                                      |                 | 50     | 1.2                | 89         |
|                                      | 1 equiv         | 23     | 3                  | 40         |
|                                      | 0.03 equiv      | 23     | 3                  | 6          |
|                                      |                 | 110    | 1.2                | 41         |

Best hit: NaN(SiMe<sub>3</sub>)<sub>2</sub>/6 equiv diglyme, 1.2 equiv **1a** in CPME at rt generated the desired product in 88% assay yield.

**LiN(SiMe<sub>3</sub>)<sub>2</sub>**

| Additive, loading  | Solvent | T (°C) | 1a loading (equiv) | AY (%) 3aa |
|--------------------|---------|--------|--------------------|------------|
| -                  | CPME    | 23     | 1.2                | NR         |
| -                  |         | 50     | 1.2                | NR         |
| -                  |         | 50     | 3                  | NR         |
| 12-crown-4 6 equiv |         | 23     | 1.2                | 97         |
| 12-crown-4 1 equiv |         | 23     | 1.2                | 79         |
|                    |         | 50     | 1.2                | 78         |
| HMTETA 6 equiv     | CPME    | 23     | 1.2                | 33         |

Best hit: LiN(SiMe<sub>3</sub>)<sub>2</sub>/6 equiv 12-crown-4, 1.2 equiv **1a** in CPME at rt generated the desired product in 97% assay yield.

**Other bases:**

| Base                | Additive, loading      | Solvent | T (°C) | 1a loading (equiv) | AY (%) 3aa |    |
|---------------------|------------------------|---------|--------|--------------------|------------|----|
| KO <sup>t</sup> Bu  | -                      | CPME    | 23     | 1.2                | NR         |    |
|                     | -                      | diglyme | 23     | 1.2                | 10         |    |
|                     | -                      | DME     | 110    | 3                  | 11         |    |
|                     | 18-crown-6 6 equiv     | CPME    | 23     | 1.2                | NR         |    |
|                     | 18-crown-6 2equiv      |         | DME    | 50                 | 1.2        | 5  |
|                     |                        |         |        | 50                 | 3          | 9  |
|                     | 18-crown-6 0.03 equiv  |         | DME    | 50                 | 1.2        | 6  |
|                     |                        |         |        | 50                 | 3          | 13 |
|                     | 18-crown-6 0.003 equiv |         | DME    | 50                 | 1.2        | 5  |
|                     |                        |         |        | 50                 | 3          | 11 |
|                     | TMEDA 3 equiv          | CPME    | 110    | 3                  | 9          |    |
|                     | TMEDA 1 equiv          |         | 110    | 3                  | 14         |    |
|                     | TMEDA 0.03 equiv       |         | 110    | 3                  | 16         |    |
|                     | PMDTA 3 equiv          |         | 110    | 3                  | 13         |    |
|                     | PMDTA 1 equiv          |         | 110    | 3                  | 14         |    |
| PMDTA 0.03 equiv    | 110                    |         | 3      | 20                 |            |    |
| HMTETA 6 equiv      | diglyme                | 23      | 1.2    | 15                 |            |    |
| LiO <sup>t</sup> Bu | -                      | CPME    | 23     | 1.2                | NR         |    |
|                     | -                      | diglyme | 23     | 1.2                | NR         |    |
|                     | 12-crown-4 6 equiv     | CPME    | 23     | 1.2                | NR         |    |
| NaO <sup>t</sup> Bu | -                      | CPME    | 23     | 1.2                | NR         |    |
|                     | -                      | diglyme | 23     | 1.2                | NR         |    |
|                     | 15-crown-5 6 equiv     | CPME    | 23     | 1.2                | NR         |    |
|                     |                        | CPME    | 110    | 1.2                | 12         |    |

**(5) Substrate Scope Screening**

| Well | Substrates | Base                                 | Additive, loading      | Prod/IS <sup>a</sup>    | Prod/IS <sup>a</sup><br>(KN(SiMe <sub>3</sub> ) <sub>2</sub> ) |
|------|------------|--------------------------------------|------------------------|-------------------------|----------------------------------------------------------------|
| A01  | 1a/2a      | LiN(SiMe <sub>3</sub> ) <sub>2</sub> | 12-crown-4, 6 equiv    | 5.28 (95%) <sup>b</sup> | 6.36                                                           |
| A07  |            | NaN(SiMe <sub>3</sub> ) <sub>2</sub> | 15-crown-5, 0.03 equiv | 6.14 (99%) <sup>b</sup> |                                                                |
| E01  |            | NaN(SiMe <sub>3</sub> ) <sub>2</sub> | HMTETA, 6 equiv        | 5.13 (86%) <sup>b</sup> |                                                                |
| E07  |            | NaN(SiMe <sub>3</sub> ) <sub>2</sub> | diglyme, 6 equiv       | 4.77 (78%) <sup>b</sup> |                                                                |
| A02  | 1a/2b      | LiN(SiMe <sub>3</sub> ) <sub>2</sub> | 12-crown-4, 6 equiv    | 0.47                    | 4.08                                                           |
| A08  |            | NaN(SiMe <sub>3</sub> ) <sub>2</sub> | 15-crown-5, 0.03 equiv | 3.96 (63%) <sup>b</sup> |                                                                |
| E02  |            | NaN(SiMe <sub>3</sub> ) <sub>2</sub> | HMTETA, 6 equiv        | 1.86                    |                                                                |
| E08  |            | NaN(SiMe <sub>3</sub> ) <sub>2</sub> | diglyme, 6 equiv       | 0.86                    |                                                                |
| A03  | 1a/2c      | LiN(SiMe <sub>3</sub> ) <sub>2</sub> | 12-crown-4, 6 equiv    | 0.31                    | 3.22                                                           |
| A09  |            | NaN(SiMe <sub>3</sub> ) <sub>2</sub> | 15-crown-5, 0.03 equiv | 0.37                    |                                                                |
| E03  |            | NaN(SiMe <sub>3</sub> ) <sub>2</sub> | HMTETA, 6 equiv        | 0                       |                                                                |
| E09  |            | NaN(SiMe <sub>3</sub> ) <sub>2</sub> | diglyme, 6 equiv       | 0.18                    |                                                                |
| A04  | 1a/2d      | LiN(SiMe <sub>3</sub> ) <sub>2</sub> | 12-crown-4, 6 equiv    | 6.90 (99%) <sup>b</sup> | 7.90                                                           |
| A10  |            | NaN(SiMe <sub>3</sub> ) <sub>2</sub> | 15-crown-5, 0.03 equiv | 7.65 (97%) <sup>b</sup> |                                                                |
| E04  |            | NaN(SiMe <sub>3</sub> ) <sub>2</sub> | HMTETA, 6 equiv        | 0.12                    |                                                                |
| E10  |            | NaN(SiMe <sub>3</sub> ) <sub>2</sub> | diglyme, 6 equiv       | 1.85                    |                                                                |
| A05  | 1a/2e      | LiN(SiMe <sub>3</sub> ) <sub>2</sub> | 12-crown-4, 6 equiv    | 6.52                    | 10.51                                                          |
| A11  |            | NaN(SiMe <sub>3</sub> ) <sub>2</sub> | 15-crown-5, 0.03 equiv | 9.96 (99%) <sup>b</sup> |                                                                |
| E05  |            | NaN(SiMe <sub>3</sub> ) <sub>2</sub> | HMTETA, 6 equiv        | 0.18                    |                                                                |
| E11  |            | NaN(SiMe <sub>3</sub> ) <sub>2</sub> | diglyme, 6 equiv       | 2.08                    |                                                                |
| A06  | 1a/2f      | LiN(SiMe <sub>3</sub> ) <sub>2</sub> | 12-crown-4, 6 equiv    | 0.74                    | 7.97                                                           |
| A12  |            | NaN(SiMe <sub>3</sub> ) <sub>2</sub> | 15-crown-5, 0.03 equiv | 7.77 (77%) <sup>b</sup> |                                                                |
| E06  |            | NaN(SiMe <sub>3</sub> ) <sub>2</sub> | HMTETA, 6 equiv        | 4.34                    |                                                                |
| E12  |            | NaN(SiMe <sub>3</sub> ) <sub>2</sub> | diglyme, 6 equiv       | 1.65                    |                                                                |

|            |              |                                      |                        |                          |                         |
|------------|--------------|--------------------------------------|------------------------|--------------------------|-------------------------|
| <b>B01</b> | <b>1c/2a</b> | LiN(SiMe <sub>3</sub> ) <sub>2</sub> | 12-crown-4, 6 equiv    | 5.46 (52%) <sup>b</sup>  | 7.78                    |
| <b>B07</b> |              | NaN(SiMe <sub>3</sub> ) <sub>2</sub> | 15-crown-5, 0.03 equiv | 2.68                     |                         |
| <b>F01</b> |              | NaN(SiMe <sub>3</sub> ) <sub>2</sub> | HMTETA, 6 equiv        | 0.68                     |                         |
| <b>F07</b> |              | NaN(SiMe <sub>3</sub> ) <sub>2</sub> | diglyme, 6 equiv       | 0.07                     |                         |
| <b>B02</b> | <b>1c/2b</b> | LiN(SiMe <sub>3</sub> ) <sub>2</sub> | 12-crown-4, 6 equiv    | 3.51 (51%) <sup>b</sup>  | 1.25 (17%) <sup>c</sup> |
| <b>B08</b> |              | NaN(SiMe <sub>3</sub> ) <sub>2</sub> | 15-crown-5, 0.03 equiv | 0.90                     |                         |
| <b>F02</b> |              | NaN(SiMe <sub>3</sub> ) <sub>2</sub> | HMTETA, 6 equiv        | 0.18                     |                         |
| <b>F08</b> |              | NaN(SiMe <sub>3</sub> ) <sub>2</sub> | diglyme, 6 equiv       | 0                        |                         |
| <b>B03</b> | <b>1c/2c</b> | LiN(SiMe <sub>3</sub> ) <sub>2</sub> | 12-crown-4, 6 equiv    | 0                        | 0                       |
| <b>B09</b> |              | NaN(SiMe <sub>3</sub> ) <sub>2</sub> | 15-crown-5, 0.03 equiv | 0                        |                         |
| <b>F03</b> |              | NaN(SiMe <sub>3</sub> ) <sub>2</sub> | HMTETA, 6 equiv        | 0                        |                         |
| <b>F09</b> |              | NaN(SiMe <sub>3</sub> ) <sub>2</sub> | diglyme, 6 equiv       | 0                        |                         |
| <b>B04</b> | <b>1c/2d</b> | LiN(SiMe <sub>3</sub> ) <sub>2</sub> | 12-crown-4, 6 equiv    | 5.20 (48%) <sup>b</sup>  | 7.02                    |
| <b>B10</b> |              | NaN(SiMe <sub>3</sub> ) <sub>2</sub> | 15-crown-5, 0.03 equiv | 2.64                     |                         |
| <b>F04</b> |              | NaN(SiMe <sub>3</sub> ) <sub>2</sub> | HMTETA, 6 equiv        | 0.55                     |                         |
| <b>F10</b> |              | NaN(SiMe <sub>3</sub> ) <sub>2</sub> | diglyme, 6 equiv       | 0.24                     |                         |
| <b>B05</b> | <b>1c/2e</b> | LiN(SiMe <sub>3</sub> ) <sub>2</sub> | 12-crown-4, 6 equiv    | 5.27 (52%) <sup>b</sup>  | 8.57                    |
| <b>B11</b> |              | NaN(SiMe <sub>3</sub> ) <sub>2</sub> | 15-crown-5, 0.03 equiv | 3.01                     |                         |
| <b>F05</b> |              | NaN(SiMe <sub>3</sub> ) <sub>2</sub> | HMTETA, 6 equiv        | 0                        |                         |
| <b>F11</b> |              | NaN(SiMe <sub>3</sub> ) <sub>2</sub> | diglyme, 6 equiv       | 0.42                     |                         |
| <b>B06</b> | <b>1c/2f</b> | LiN(SiMe <sub>3</sub> ) <sub>2</sub> | 12-crown-4, 6 equiv    | 6.00 (63%) <sup>b</sup>  | 8.41                    |
| <b>B12</b> |              | NaN(SiMe <sub>3</sub> ) <sub>2</sub> | 15-crown-5, 0.03 equiv | 2.71                     |                         |
| <b>F06</b> |              | NaN(SiMe <sub>3</sub> ) <sub>2</sub> | HMTETA, 6 equiv        | 0                        |                         |
| <b>F12</b> |              | NaN(SiMe <sub>3</sub> ) <sub>2</sub> | diglyme, 6 equiv       | 0.15                     |                         |
| <b>C01</b> | <b>1d/2a</b> | LiN(SiMe <sub>3</sub> ) <sub>2</sub> | 12-crown-4, 6 equiv    | 3.66                     | 6.68                    |
| <b>C07</b> |              | NaN(SiMe <sub>3</sub> ) <sub>2</sub> | 15-crown-5, 0.03 equiv | 0.35                     |                         |
| <b>G01</b> |              | NaN(SiMe <sub>3</sub> ) <sub>2</sub> | HMTETA, 6 equiv        | 4.46 (99%) <sup>b</sup>  |                         |
| <b>G07</b> |              | NaN(SiMe <sub>3</sub> ) <sub>2</sub> | diglyme, 6 equiv       | 2.98                     |                         |
| <b>C02</b> | <b>1d/2b</b> | LiN(SiMe <sub>3</sub> ) <sub>2</sub> | 12-crown-4, 6 equiv    | 5.63 (76%) <sup>b</sup>  | 3.36 (50%) <sup>c</sup> |
| <b>C08</b> |              | NaN(SiMe <sub>3</sub> ) <sub>2</sub> | 15-crown-5, 0.03 equiv | 3.33                     |                         |
| <b>G02</b> |              | NaN(SiMe <sub>3</sub> ) <sub>2</sub> | HMTETA, 6 equiv        | 3.56                     |                         |
| <b>G08</b> |              | NaN(SiMe <sub>3</sub> ) <sub>2</sub> | diglyme, 6 equiv       | 0.16                     |                         |
| <b>C03</b> | <b>1d/2c</b> | LiN(SiMe <sub>3</sub> ) <sub>2</sub> | 12-crown-4, 6 equiv    | 0                        | 0                       |
| <b>C09</b> |              | NaN(SiMe <sub>3</sub> ) <sub>2</sub> | 15-crown-5, 0.03 equiv | 0                        |                         |
| <b>G03</b> |              | NaN(SiMe <sub>3</sub> ) <sub>2</sub> | HMTETA, 6 equiv        | 0                        |                         |
| <b>G09</b> |              | NaN(SiMe <sub>3</sub> ) <sub>2</sub> | diglyme, 6 equiv       | 0                        |                         |
| <b>C04</b> | <b>1d/2d</b> | LiN(SiMe <sub>3</sub> ) <sub>2</sub> | 12-crown-4, 6 equiv    | 7.67                     | 7.99                    |
| <b>C10</b> |              | NaN(SiMe <sub>3</sub> ) <sub>2</sub> | 15-crown-5, 0.03 equiv | 7.66 (99%) <sup>b</sup>  |                         |
| <b>G04</b> |              | NaN(SiMe <sub>3</sub> ) <sub>2</sub> | HMTETA, 6 equiv        | 4.41                     |                         |
| <b>G10</b> |              | NaN(SiMe <sub>3</sub> ) <sub>2</sub> | diglyme, 6 equiv       | 3.13                     |                         |
| <b>C05</b> | <b>1d/2e</b> | LiN(SiMe <sub>3</sub> ) <sub>2</sub> | 12-crown-4, 6 equiv    | 0                        | 10.46                   |
| <b>C11</b> |              | NaN(SiMe <sub>3</sub> ) <sub>2</sub> | 15-crown-5, 0.03 equiv | 10.01 (99%) <sup>b</sup> |                         |
| <b>G05</b> |              | NaN(SiMe <sub>3</sub> ) <sub>2</sub> | HMTETA, 6 equiv        | 7.63                     |                         |
| <b>G11</b> |              | NaN(SiMe <sub>3</sub> ) <sub>2</sub> | diglyme, 6 equiv       | 2.90                     |                         |
| <b>C06</b> | <b>1d/2f</b> | LiN(SiMe <sub>3</sub> ) <sub>2</sub> | 12-crown-4, 6 equiv    | 7.73 (88%) <sup>b</sup>  | 8.91                    |
| <b>C12</b> |              | NaN(SiMe <sub>3</sub> ) <sub>2</sub> | 15-crown-5, 0.03 equiv | 8.70                     |                         |
| <b>G06</b> |              | NaN(SiMe <sub>3</sub> ) <sub>2</sub> | HMTETA, 6 equiv        | 5.95                     |                         |
| <b>G12</b> |              | NaN(SiMe <sub>3</sub> ) <sub>2</sub> | diglyme, 6 equiv       | 3.35                     |                         |
| <b>D01</b> | <b>1b/2a</b> | LiN(SiMe <sub>3</sub> ) <sub>2</sub> | 12-crown-4, 6 equiv    | 6.23                     | 6.45                    |
| <b>D07</b> |              | NaN(SiMe <sub>3</sub> ) <sub>2</sub> | 15-crown-5, 0.03 equiv | 1.68                     |                         |
| <b>H01</b> |              | NaN(SiMe <sub>3</sub> ) <sub>2</sub> | HMTETA, 6 equiv        | 2.39                     |                         |
| <b>H07</b> |              | NaN(SiMe <sub>3</sub> ) <sub>2</sub> | diglyme, 6 equiv       | 6.13 (99%) <sup>b</sup>  |                         |
| <b>D02</b> | <b>1b/2b</b> | LiN(SiMe <sub>3</sub> ) <sub>2</sub> | 12-crown-4, 6 equiv    | 4.32                     | 1.46 (68%) <sup>c</sup> |
| <b>D08</b> |              | NaN(SiMe <sub>3</sub> ) <sub>2</sub> | 15-crown-5, 0.03 equiv | 4.57 (99%) <sup>b</sup>  |                         |
| <b>H02</b> |              | NaN(SiMe <sub>3</sub> ) <sub>2</sub> | HMTETA, 6 equiv        | 1.79                     |                         |
| <b>H08</b> |              | NaN(SiMe <sub>3</sub> ) <sub>2</sub> | diglyme, 6 equiv       | 4.96                     |                         |
| <b>D03</b> |              | LiN(SiMe <sub>3</sub> ) <sub>2</sub> | 12-crown-4, 6 equiv    | multiple                 |                         |

|            |              |                                      |                        |                                       |                            |
|------------|--------------|--------------------------------------|------------------------|---------------------------------------|----------------------------|
|            | <b>1b/2c</b> |                                      |                        | products                              | 1.17 (0%) <sup>c</sup>     |
| <b>D09</b> |              | NaN(SiMe <sub>3</sub> ) <sub>2</sub> | 15-crown-5, 0.03 equiv | 4.50 (multiple products) <sup>b</sup> |                            |
| <b>H03</b> |              | NaN(SiMe <sub>3</sub> ) <sub>2</sub> | HMTETA, 6 equiv        | multiple products                     |                            |
| <b>H09</b> |              | NaN(SiMe <sub>3</sub> ) <sub>2</sub> | diglyme, 6 equiv       | multiple products                     |                            |
| <b>D04</b> | <b>1b/2d</b> | LiN(SiMe <sub>3</sub> ) <sub>2</sub> | 12-crown-4, 6 equiv    | 6.21                                  | 5.91 (quant.) <sup>c</sup> |
| <b>D10</b> |              | NaN(SiMe <sub>3</sub> ) <sub>2</sub> | 15-crown-5, 0.03 equiv | 7.56 (116%) <sup>b</sup>              |                            |
| <b>H04</b> |              | NaN(SiMe <sub>3</sub> ) <sub>2</sub> | HMTETA, 6 equiv        | 6.04                                  |                            |
| <b>H10</b> |              | NaN(SiMe <sub>3</sub> ) <sub>2</sub> | diglyme, 6 equiv       | 1.11                                  |                            |
| <b>D05</b> | <b>1b/2e</b> | LiN(SiMe <sub>3</sub> ) <sub>2</sub> | 12-crown-4, 6 equiv    | 0.77                                  | 5.95 (quant.) <sup>c</sup> |
| <b>D11</b> |              | NaN(SiMe <sub>3</sub> ) <sub>2</sub> | 15-crown-5, 0.03 equiv | 7.27 (110%) <sup>b</sup>              |                            |
| <b>H05</b> |              | NaN(SiMe <sub>3</sub> ) <sub>2</sub> | HMTETA, 6 equiv        | 7.13                                  |                            |
| <b>H11</b> |              | NaN(SiMe <sub>3</sub> ) <sub>2</sub> | diglyme, 6 equiv       | 7.10                                  |                            |
| <b>D06</b> | <b>1b/2f</b> | LiN(SiMe <sub>3</sub> ) <sub>2</sub> | 12-crown-4, 6 equiv    | 0                                     | 7.87                       |
| <b>D12</b> |              | NaN(SiMe <sub>3</sub> ) <sub>2</sub> | 15-crown-5, 0.03 equiv | 7.44 (99%) <sup>b</sup>               |                            |
| <b>H06</b> |              | NaN(SiMe <sub>3</sub> ) <sub>2</sub> | HMTETA, 6 equiv        | 2.72                                  |                            |
| <b>H12</b> |              | NaN(SiMe <sub>3</sub> ) <sub>2</sub> | diglyme, 6 equiv       | 0                                     |                            |

<sup>a</sup>Ratio product/internal standard obtained by high-throughput screening; <sup>b</sup>isolated yield on laboratory scale (0.1 mmol); <sup>c</sup>yield determined by <sup>1</sup>H NMR spectroscopy of the crude reaction mixture on laboratory scale.

Representative 96 well plate for screening (5).

LiN(SiMe<sub>3</sub>)<sub>2</sub>, 6 equiv 12-crown-4, CPME, rt

NaN(SiMe<sub>3</sub>)<sub>2</sub>, 30 mol % 15-crown-5, CPME, rt

|                                                                                     |          | 2a                                                                                | 2b                                                                                | 2c                                                                                | 2d                                                                                | 2e                                                                                | 2f                                                                                | 2a                                                                                | 2b                                                                                  | 2c                                                                                  | 2d                                                                                  | 2e                                                                                  | 2f                                                                                  |
|-------------------------------------------------------------------------------------|----------|-----------------------------------------------------------------------------------|-----------------------------------------------------------------------------------|-----------------------------------------------------------------------------------|-----------------------------------------------------------------------------------|-----------------------------------------------------------------------------------|-----------------------------------------------------------------------------------|-----------------------------------------------------------------------------------|-------------------------------------------------------------------------------------|-------------------------------------------------------------------------------------|-------------------------------------------------------------------------------------|-------------------------------------------------------------------------------------|-------------------------------------------------------------------------------------|
|                                                                                     |          | 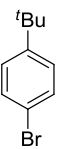 |  |  |  |  |  |  |  |  |  |  |  |
|                                                                                     |          | 1                                                                                 | 2                                                                                 | 3                                                                                 | 4                                                                                 | 5                                                                                 | 6                                                                                 | 7                                                                                 | 8                                                                                   | 9                                                                                   | 10                                                                                  | 11                                                                                  | 12                                                                                  |
|    | <i>A</i> | 87<br>(97)<br><b>3aa</b>                                                          | 6<br><b>3ab</b>                                                                   | 25<br><b>3ac</b>                                                                  | 106<br>(99)<br><b>3ad</b>                                                         | 66<br><b>3ae</b>                                                                  | 9<br><b>3af</b>                                                                   | 96<br>(99)<br><b>3aa</b>                                                          | 54<br>(63)<br><b>3ab</b>                                                            | 18<br><b>3ac</b>                                                                    | 118<br>(97)<br><b>3ad</b>                                                           | 105<br>(99)<br><b>3ae</b>                                                           | 91 (77)<br><b>3af</b>                                                               |
|    | <i>B</i> | 61<br>(52)<br><b>3ca</b>                                                          | 39<br>(51)<br><b>3cb</b>                                                          | mult.<br>prod.<br><b>3cc</b>                                                      | 59<br>(48)<br><b>3cd</b>                                                          | 48<br>(61)<br><b>3ce</b>                                                          | 55 (63)<br><b>3cf</b>                                                             | 30<br><b>3ca</b>                                                                  | 10<br><b>3cb</b>                                                                    | mult.<br>prods.<br><b>3cc</b>                                                       | 30<br><b>3cd</b>                                                                    | 27<br><b>3ce</b>                                                                    | 25<br><b>3cf</b>                                                                    |
|    | <i>C</i> | 60<br><b>3da</b>                                                                  | 74<br>(76)<br><b>3db</b>                                                          | 12<br><b>3dc</b>                                                                  | 101<br><b>3dd</b>                                                                 | 0<br><b>3de</b>                                                                   | 82 (88)<br><b>3df</b>                                                             | 6<br><b>3da</b>                                                                   | 44<br><b>3db</b>                                                                    | 8<br><b>3dc</b>                                                                     | 101<br>(99)<br><b>3dd</b>                                                           | 109<br>(99)<br><b>3de</b>                                                           | 103<br><b>3df</b>                                                                   |
|    | <i>D</i> | 82<br><b>3ba</b>                                                                  | 76<br><b>3bb</b>                                                                  | 81<br>(78)<br><b>3bc</b>                                                          | 92<br><b>3bd</b>                                                                  | 10<br><b>3be</b>                                                                  | 0<br><b>3bf</b>                                                                   | 26<br><b>3ba</b>                                                                  | 73<br>(99)<br><b>3bb</b>                                                            | 21<br><b>3bc</b>                                                                    | 112<br>(99)<br><b>3bd</b>                                                           | 99<br>(94)<br><b>3be</b>                                                            | 73 (99)<br><b>3bf</b>                                                               |
|  | <i>E</i> | 80<br>(86)<br><b>3aa</b>                                                          | 25<br><b>3ab</b>                                                                  | 4<br><b>3ac</b>                                                                   | 2<br><b>3ad</b>                                                                   | 2<br><b>3ae</b>                                                                   | 36<br><b>3af</b>                                                                  | 88<br>(78)<br><b>3aa</b>                                                          | 12<br><b>3ab</b>                                                                    | 0<br><b>3ac</b>                                                                     | 28<br><b>3ad</b>                                                                    | 23<br><b>3ae</b>                                                                    | 19<br><b>3af</b>                                                                    |
|  | <i>F</i> | 8<br><b>3ca</b>                                                                   | 2<br><b>3cb</b>                                                                   | 0<br><b>3cc</b>                                                                   | 6<br><b>3cd</b>                                                                   | 0<br><b>3ce</b>                                                                   | 0<br><b>3cf</b>                                                                   | 1<br><b>3ca</b>                                                                   | 0<br><b>3cb</b>                                                                     | 0<br><b>3cc</b>                                                                     | 3<br><b>3cd</b>                                                                     | 4<br><b>3ce</b>                                                                     | 1<br><b>3cf</b>                                                                     |
|  | <i>G</i> | 73<br>(99)<br><b>3da</b>                                                          | 47<br><b>3db</b>                                                                  | 0<br><b>3dc</b>                                                                   | 58<br><b>3dd</b>                                                                  | 83<br><b>3de</b>                                                                  | 56<br><b>3df</b>                                                                  | 49<br><b>3da</b>                                                                  | 2<br><b>3db</b>                                                                     | 0<br><b>3dc</b>                                                                     | 41<br><b>3dd</b>                                                                    | 32<br><b>3de</b>                                                                    | 32<br><b>3df</b>                                                                    |
|  | <i>H</i> | 37<br><b>3ba</b>                                                                  | 31<br><b>3bb</b>                                                                  | 19<br><b>3bc</b>                                                                  | 66<br><b>3bd</b>                                                                  | 83<br><b>3be</b>                                                                  | 27<br><b>3bf</b>                                                                  | 95<br>(99)<br><b>3ba</b>                                                          | 87<br><b>3bb</b>                                                                    | mult.<br>prods.<br><b>3bc</b>                                                       | 16<br><b>3bd</b>                                                                    | 97<br><b>3be</b>                                                                    | 0<br><b>3bf</b>                                                                     |

NaN(SiMe<sub>3</sub>)<sub>2</sub>, 6 equiv HMTETA, CPME, rt

NaN(SiMe<sub>3</sub>)<sub>2</sub>, 6 equiv diglyme, CPME, rt

Numbers in black correspond to yield based on <sup>1</sup>H NMR of the crude mixture; numbers in blue correspond to HPLC calibrated yields from <sup>1</sup>H NMR; numbers in brackets correspond to isolated yields on laboratory scale.

(6) Challenging Ar-Br Screening with 1a

| Well    | Condition                                                    | Substrate | Prod/IS <sup>a</sup>    |
|---------|--------------------------------------------------------------|-----------|-------------------------|
| A01     | LiN(SiMe <sub>3</sub> ) <sub>2</sub> /12-crown-4, 6 equiv    | 2g        | 4.18 (67%) <sup>b</sup> |
| A02     |                                                              | 2h        | 0                       |
| A03     |                                                              | 2i        | 3.35 (75%) <sup>b</sup> |
| A04     |                                                              | 2j        | 0                       |
| A05     |                                                              | 2k        | 0                       |
| A06     |                                                              | 2l        | 0                       |
| B01     | NaN(SiMe <sub>3</sub> ) <sub>2</sub> /15-crown-5, 0.03 equiv | 2g        | 2.45 (34%) <sup>b</sup> |
| B02     |                                                              | 2h        | 0                       |
| B03     |                                                              | 2i        | 1.16 (37%) <sup>b</sup> |
| B04     |                                                              | 2j        | 0                       |
| B05     |                                                              | 2k        | 0                       |
| B06     |                                                              | 2l        | 0                       |
| C01     | NaN(SiMe <sub>3</sub> ) <sub>2</sub> /HMTETA, 6 equiv        | 2g        | 0                       |
| C02     |                                                              | 2h        | 0                       |
| C03     |                                                              | 2i        | 0.71                    |
| C04     |                                                              | 2j        | 0                       |
| C05     |                                                              | 2k        | 0                       |
| C06     |                                                              | 2l        | 0                       |
| D01     | NaN(SiMe <sub>3</sub> ) <sub>2</sub> /diglyme, 6 equiv       | 2g        | 0                       |
| D02     |                                                              | 2h        | 0                       |
| D03     |                                                              | 2i        | 0.74                    |
| D04     |                                                              | 2j        | 0                       |
| D05     |                                                              | 2k        | 0                       |
| D06     |                                                              | 2l        | 0                       |
| Control | KN(SiMe <sub>3</sub> ) <sub>2</sub>                          | 2g        | 1.15 (16%) <sup>b</sup> |
|         |                                                              | 2h        | 0                       |
|         |                                                              | 2i        | 0                       |
|         |                                                              | 2j        | 0                       |
|         |                                                              | 2k        | 0                       |
|         |                                                              | 2l        | 0                       |

<sup>a</sup>Ratio product/internal standard obtained by high-throughput screening; <sup>b</sup>isolated yield on laboratory scale.

(7) Screening of compounds **2g** and **2i** with diarylmethanes **1b-1d**

|                                                                                                | Ar-Br                                                  | <b>2g</b><br>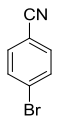 |                     | <b>2i</b><br> |                     |
|------------------------------------------------------------------------------------------------|--------------------------------------------------------|-------------------------------------------------------------------------------------------------|---------------------|--------------------------------------------------------------------------------------------------|---------------------|
| Diarylmethanes                                                                                 | Conditions                                             | Prod/IS <sup>a</sup>                                                                            | AY (%) <sup>b</sup> | Prod/IS <sup>a</sup>                                                                             | AY (%) <sup>b</sup> |
| <br><b>1b</b> | LiN(SiMe <sub>3</sub> ) <sub>2</sub> , 6 equiv 12-C-4  | 4.86                                                                                            | 92 (86)             | 3.76                                                                                             | 95                  |
|                                                                                                | NaN(SiMe <sub>3</sub> ) <sub>2</sub> , 30 mol % 15-C-5 | 4.38                                                                                            | 83                  | 3.58                                                                                             | 83                  |
|                                                                                                | NaN(SiMe <sub>3</sub> ) <sub>2</sub> , 6 equiv HMTETA  | 4.03                                                                                            | 69                  | 4.29                                                                                             | 107 (96)            |
|                                                                                                | NaN(SiMe <sub>3</sub> ) <sub>2</sub> , 6 equiv diglyme | 3.68                                                                                            | 54                  | 1.69                                                                                             | 44                  |
|                                                                                                | CONTROL - KN(SiMe <sub>3</sub> ) <sub>2</sub>          | 2.88                                                                                            | 20                  | 2.80                                                                                             | 74                  |
|                                                                                                | <b>Product</b>                                         | <b>3bg</b>                                                                                      |                     | <b>3bi</b>                                                                                       |                     |
| <br><b>1c</b> | LiN(SiMe <sub>3</sub> ) <sub>2</sub> , 6 equiv 12-C-4  | 0.88                                                                                            | 0                   | 0.67                                                                                             | <6                  |
|                                                                                                | NaN(SiMe <sub>3</sub> ) <sub>2</sub> , 30 mol % 15-C-5 | 0.86                                                                                            | 0                   | 0.64                                                                                             | 0                   |
|                                                                                                | NaN(SiMe <sub>3</sub> ) <sub>2</sub> , 6 equiv HMTETA  | NR <sup>c</sup>                                                                                 | 0                   | NR <sup>c</sup>                                                                                  | 0                   |
|                                                                                                | NaN(SiMe <sub>3</sub> ) <sub>2</sub> , 6 equiv diglyme | NR <sup>c</sup>                                                                                 | 0                   | NR <sup>c</sup>                                                                                  | 0                   |
|                                                                                                | CONTROL - KN(SiMe <sub>3</sub> ) <sub>2</sub>          | 2.35                                                                                            | 0                   | 0.29                                                                                             | 0                   |
|                                                                                                | <b>Product</b>                                         | <b>3cg</b>                                                                                      |                     | <b>3ci</b>                                                                                       |                     |
| <br><b>1d</b> | LiN(SiMe <sub>3</sub> ) <sub>2</sub> , 6 equiv 12-C-4  | 0                                                                                               | 0                   | 3.07                                                                                             | 83 (85)             |
|                                                                                                | NaN(SiMe <sub>3</sub> ) <sub>2</sub> , 30 mol % 15-C-5 | 4.48                                                                                            | 18 (26)             | 0.78                                                                                             | 60                  |
|                                                                                                | NaN(SiMe <sub>3</sub> ) <sub>2</sub> , 6 equiv HMTETA  | 0.74                                                                                            | 3                   | 0.23                                                                                             | 0                   |
|                                                                                                | NaN(SiMe <sub>3</sub> ) <sub>2</sub> , 6 equiv diglyme | NR <sup>c</sup>                                                                                 | 0                   | NR <sup>c</sup>                                                                                  | 0                   |
|                                                                                                | CONTROL - KN(SiMe <sub>3</sub> ) <sub>2</sub>          | 3.82                                                                                            | 14                  | 0.23                                                                                             | 0                   |
|                                                                                                | <b>Product</b>                                         | <b>3dg</b>                                                                                      |                     | <b>3di</b>                                                                                       |                     |

<sup>a</sup>Ratio product/internal standard obtained by high-throughput screening; <sup>b</sup>results correspond to assay yields based on <sup>1</sup>H NMR of the crude mixture in the high-throughput screening. Control results correspond to <sup>1</sup>H NMR yields from the crude mixture on laboratory scale. Numbers in brackets correspond to isolated yields on laboratory scale; <sup>c</sup>NR = no reaction, starting material unreacted.

(8) Screening of compounds **2c** with diarylmethanes **1a-1d** using 2 equivalents of base and 3 equivalents of diarylmethane

|                                                                                                  | Ar-Br                                                  | <b>2c</b>                                                                           |                     |
|--------------------------------------------------------------------------------------------------|--------------------------------------------------------|-------------------------------------------------------------------------------------|---------------------|
|                                                                                                  |                                                        | 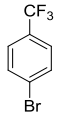 |                     |
| Diarylmethanes                                                                                   | Conditions                                             | Prod/IS <sup>a</sup>                                                                | AY (%) <sup>b</sup> |
| <br><b>1a</b>   | LiN(SiMe <sub>3</sub> ) <sub>2</sub> , 6 equiv 12-C-4  | 2.85                                                                                | 25                  |
|                                                                                                  | NaN(SiMe <sub>3</sub> ) <sub>2</sub> , 30 mol % 15-C-5 | 2.10                                                                                | 18                  |
|                                                                                                  | NaN(SiMe <sub>3</sub> ) <sub>2</sub> , 6 equiv HMTETA  | 0.50                                                                                | 4                   |
|                                                                                                  | NaN(SiMe <sub>3</sub> ) <sub>2</sub> , 6 equiv diglyme | NR                                                                                  | 0                   |
|                                                                                                  | CONTROL - KN(SiMe <sub>3</sub> ) <sub>2</sub>          | 6.90                                                                                | 66                  |
|                                                                                                  | <b>Product</b>                                         | <b>3ac</b>                                                                          |                     |
| <br><b>1b</b>   | LiN(SiMe <sub>3</sub> ) <sub>2</sub> , 6 equiv 12-C-4  | 5.06                                                                                | 81 (78)             |
|                                                                                                  | NaN(SiMe <sub>3</sub> ) <sub>2</sub> , 30 mol % 15-C-5 | 1.29                                                                                | 21                  |
|                                                                                                  | NaN(SiMe <sub>3</sub> ) <sub>2</sub> , 6 equiv HMTETA  | 1.24                                                                                | 19                  |
|                                                                                                  | NaN(SiMe <sub>3</sub> ) <sub>2</sub> , 6 equiv diglyme | multiple products                                                                   | - <sup>c</sup>      |
|                                                                                                  | CONTROL - KN(SiMe <sub>3</sub> ) <sub>2</sub>          | NR                                                                                  | <5                  |
|                                                                                                  | <b>Product</b>                                         | <b>3bc</b>                                                                          |                     |
| <br><b>1c</b> | LiN(SiMe <sub>3</sub> ) <sub>2</sub> , 6 equiv 12-C-4  | multiple products                                                                   | - <sup>c</sup>      |
|                                                                                                  | NaN(SiMe <sub>3</sub> ) <sub>2</sub> , 30 mol % 15-C-5 | multiple products                                                                   | - <sup>c</sup>      |
|                                                                                                  | NaN(SiMe <sub>3</sub> ) <sub>2</sub> , 6 equiv HMTETA  | NR <sup>d</sup>                                                                     | - <sup>c</sup>      |
|                                                                                                  | NaN(SiMe <sub>3</sub> ) <sub>2</sub> , 6 equiv diglyme | NR <sup>d</sup>                                                                     | - <sup>c</sup>      |
|                                                                                                  | CONTROL - KN(SiMe <sub>3</sub> ) <sub>2</sub>          | multiple products                                                                   | - <sup>c</sup>      |
|                                                                                                  | <b>Product</b>                                         | <b>3cc</b>                                                                          |                     |
| <br><b>1d</b> | LiN(SiMe <sub>3</sub> ) <sub>2</sub> , 6 equiv 12-C-4  | 1.24                                                                                | 12                  |
|                                                                                                  | NaN(SiMe <sub>3</sub> ) <sub>2</sub> , 30 mol % 15-C-5 | 0.85                                                                                | 8                   |
|                                                                                                  | NaN(SiMe <sub>3</sub> ) <sub>2</sub> , 6 equiv HMTETA  | NR <sup>d</sup>                                                                     | 0                   |
|                                                                                                  | NaN(SiMe <sub>3</sub> ) <sub>2</sub> , 6 equiv diglyme | NR <sup>d</sup>                                                                     | 0                   |
|                                                                                                  | CONTROL - KN(SiMe <sub>3</sub> ) <sub>2</sub>          | 2.84                                                                                | 40                  |
|                                                                                                  | <b>Product</b>                                         | <b>3dc</b>                                                                          |                     |

<sup>a</sup>Ratio product/internal standard obtained by high-throughput screening; <sup>b</sup>results correspond to assay yields based on <sup>1</sup>H NMR of the crude mixture in the high-throughput screening. Control results correspond to <sup>1</sup>H NMR yields from the crude mixture on laboratory scale. Numbers in brackets correspond to isolated yields on laboratory scale; <sup>c</sup>not determined; <sup>d</sup>NR = no reaction, starting material unreacted.



## References.

1. T. C. Fessard, H. Motoyoshi and E. M. Carreira, *Angew. Chem. Int. Ed.*, 2007, **46**, 2078.
2. J. J. Eisch, C. A. Kovacs, P. Chobe and M. P. Boleslawski, *J. Org. Chem.*, 1987, **52**, 4427.
3. J. Zhang, A. Bellomo, A. D. Creamer, S. D. Dreher and P. J. Walsh, *J. Am. Chem. Soc.*, 2012, **134**, 13765.
4. G. K. S. Prakash, C. Panja, A. Shakhmin, E. Shah, T. Mathew and G. A. Olah, *J. Org. Chem.*, 2009, **74**, 8659.
5. G. Song, Y. Su, X. Gong, K. Han and X. Li, *Organic Lett.*, 2011, **13**, 1968.
6. S. Duez, A. K. Steib, S. M. Manolikakes and P. Knochel, *Angew. Chem. Int. Ed.*, 2011, **50**, 7686.
7. T. Niwa, H. Yorimitsu and K. Oshima, *Organic Lett.*, 2007, **9**, 2373.
8. C. R. Liu, M. B. Li, C. F. Yang and S. K. Tian, *Chem. Commun.*, 2008, 1249.

## NMR Spectra.

### 1,1,2-triphenylethane

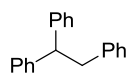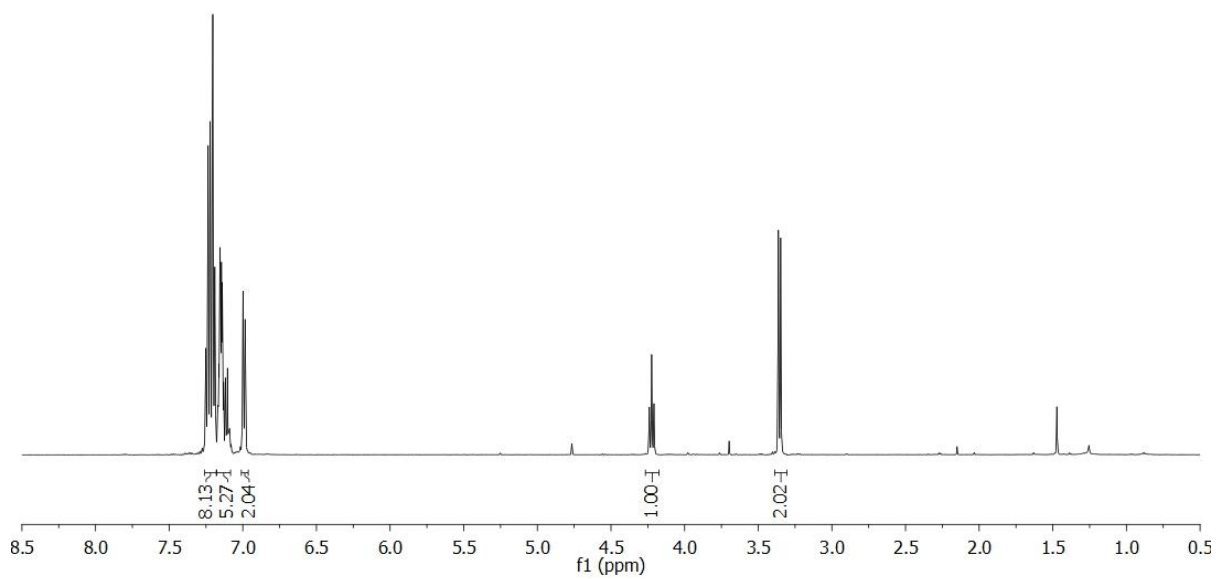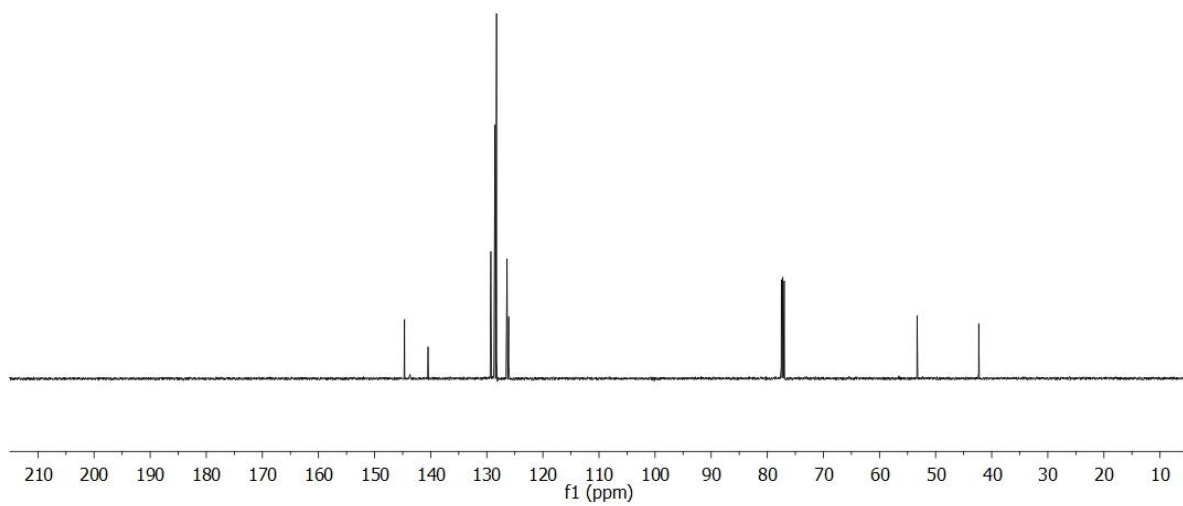

## 2-(1,2-diphenylethyl)pyridine

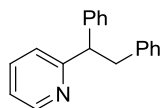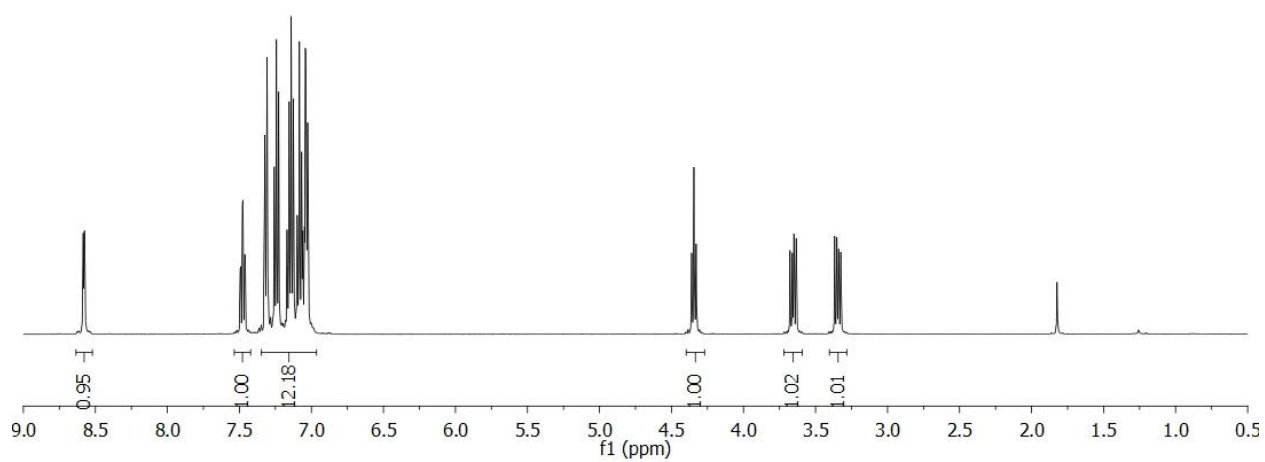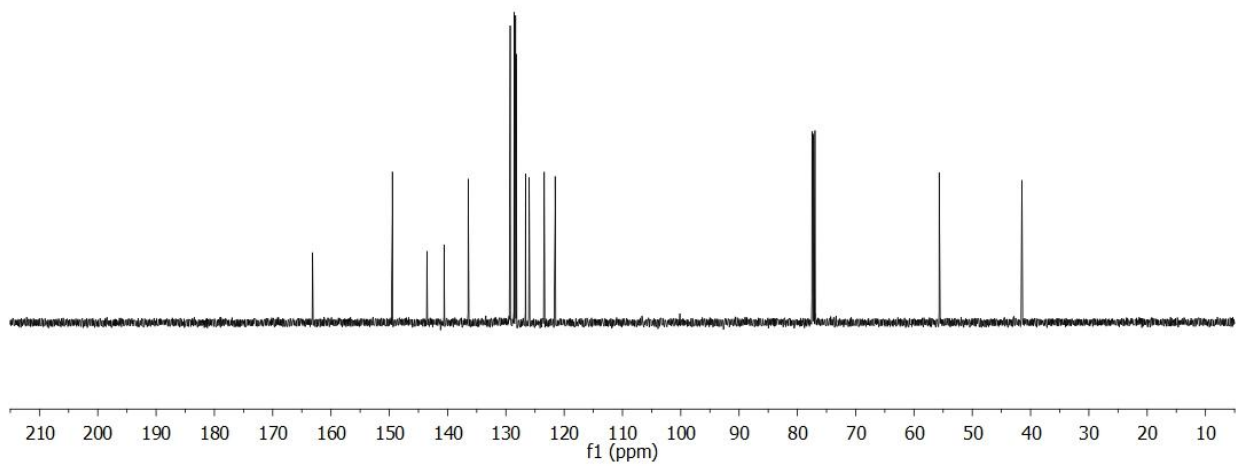

**3aa – (4-*tert*-butylphenyl)diphenylmethane**

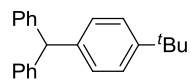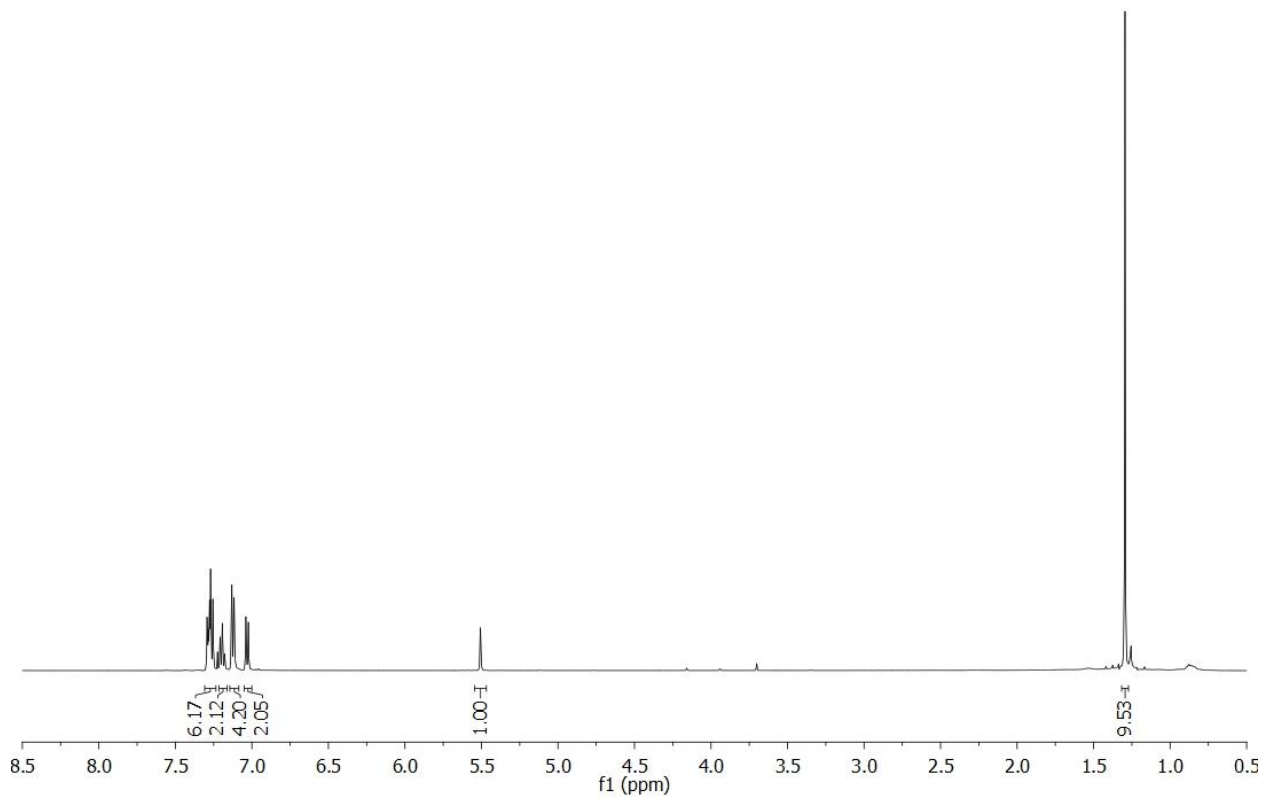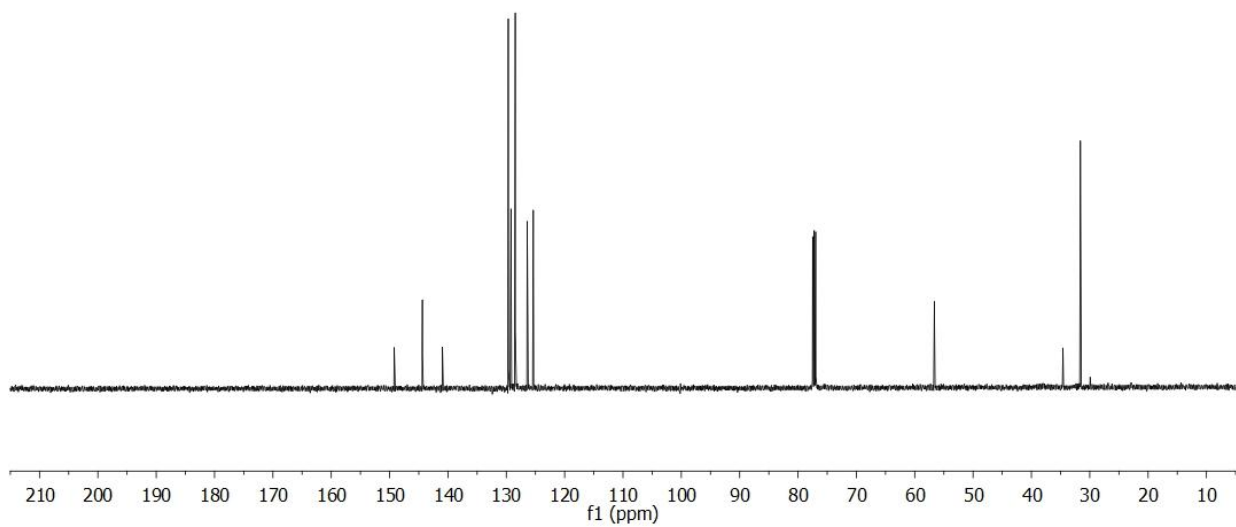

**3ab – (4-fluorophenyl)diphenylmethane**

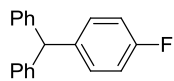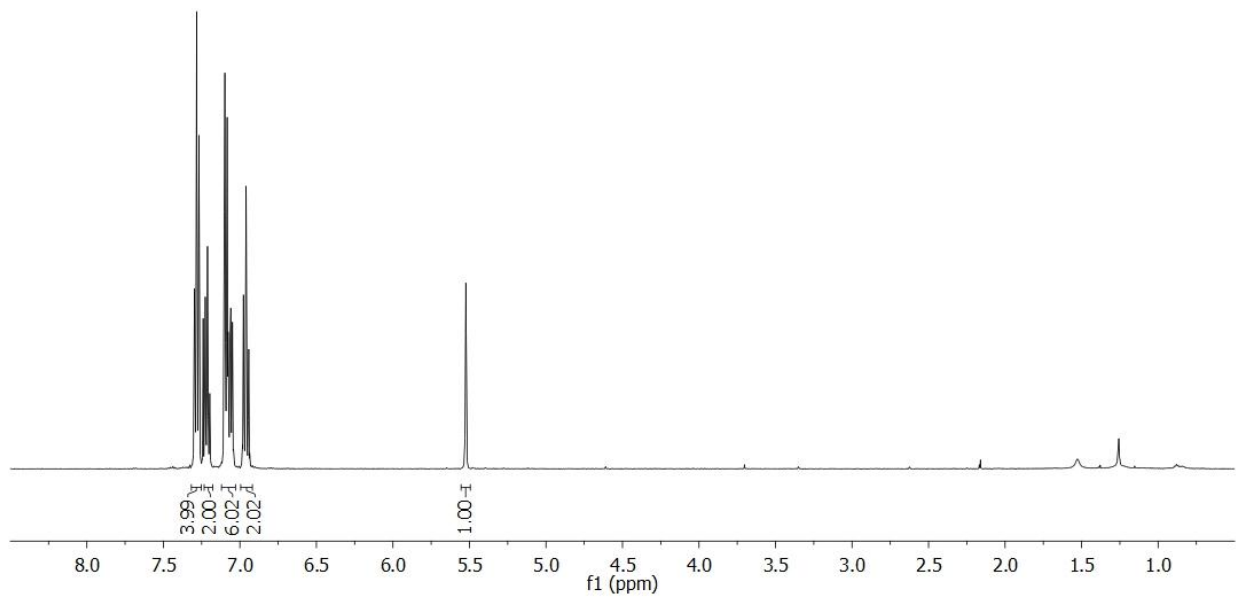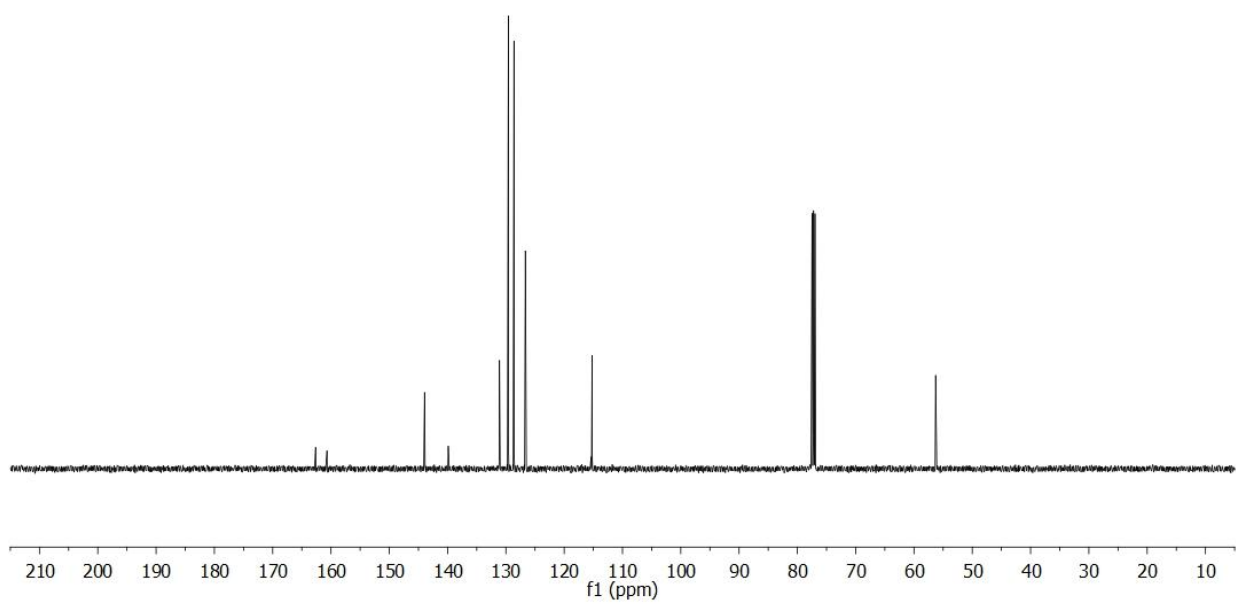

**3ad – (4-methoxyphenyl)diphenylmethane**

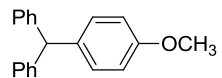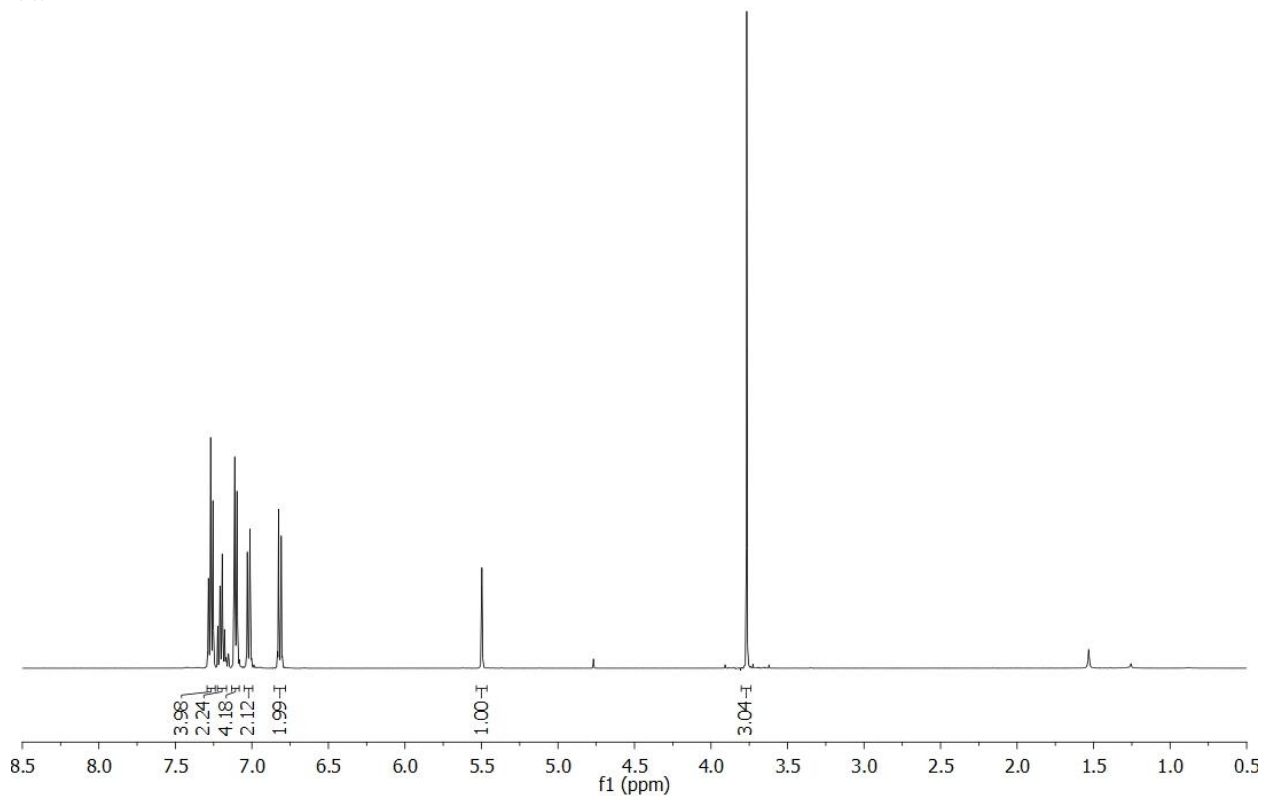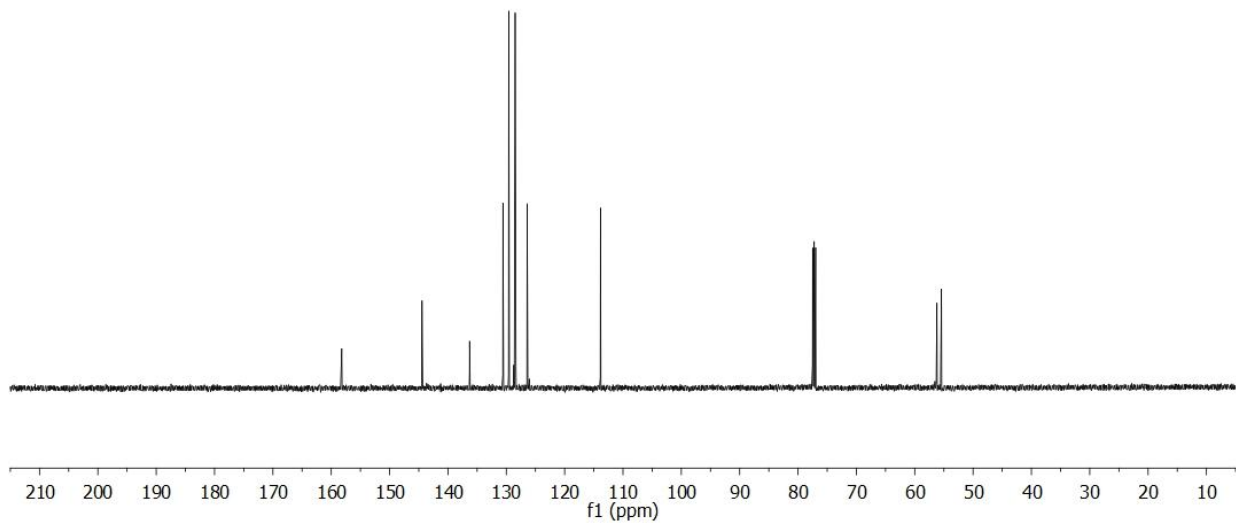

**3ae – (*N,N*-dimethylaminophenyl)diphenylmethane**

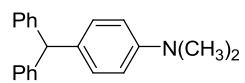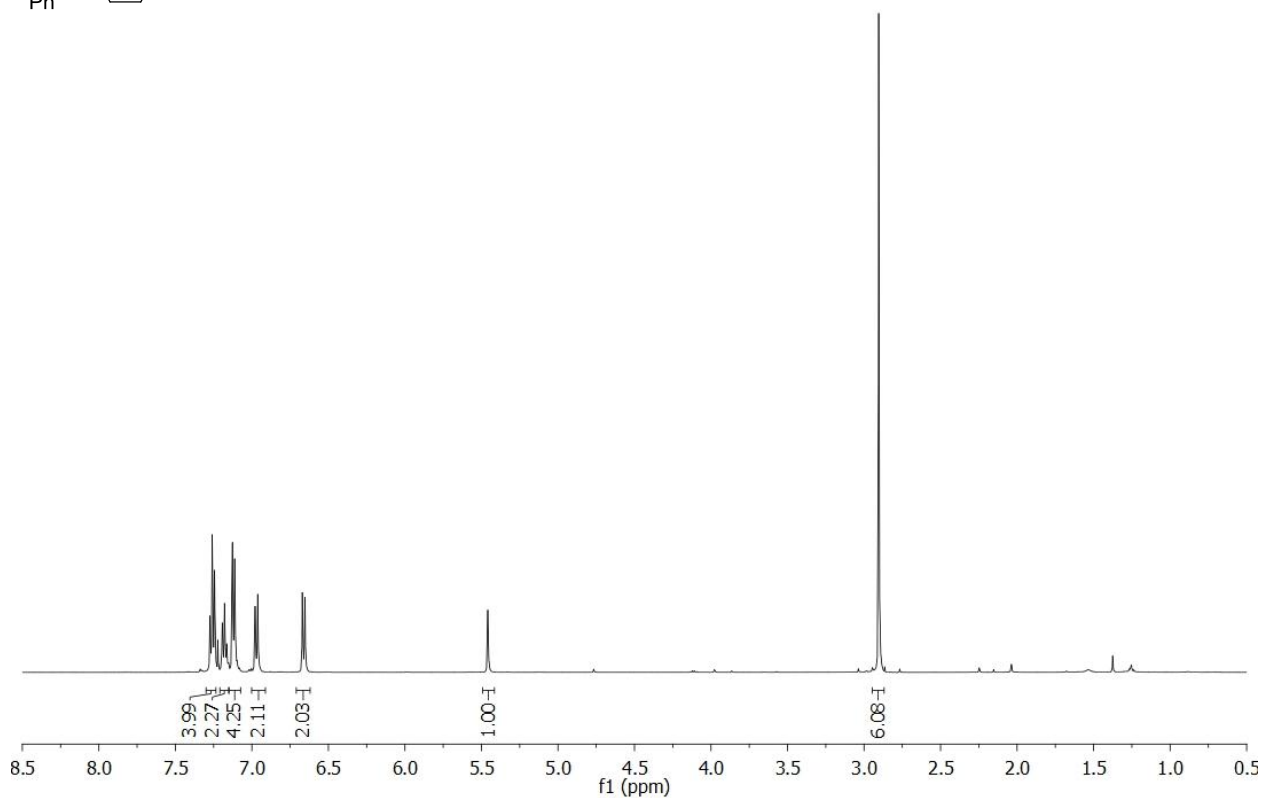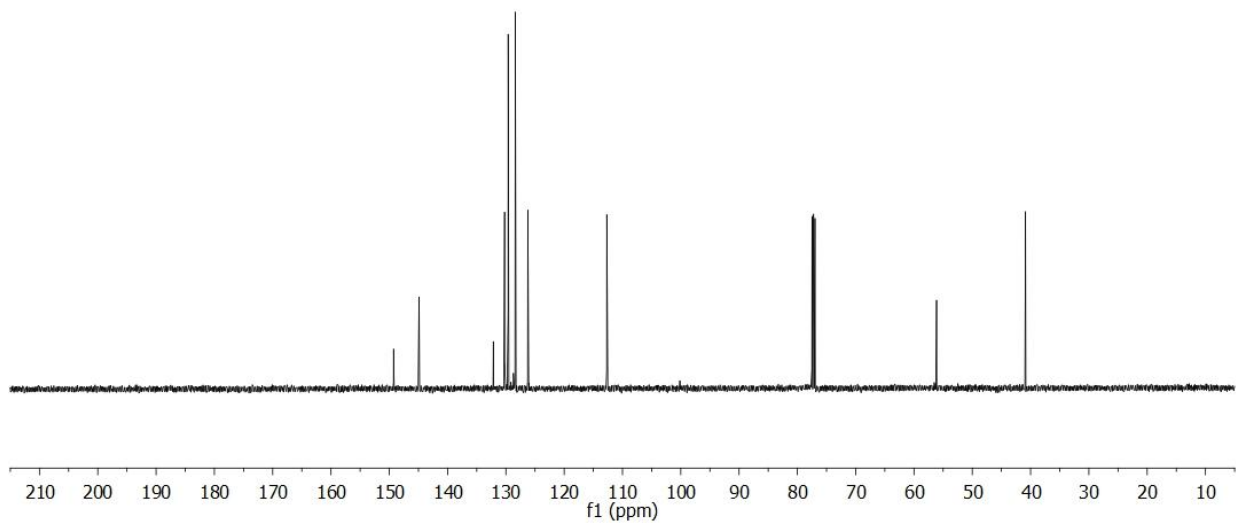

**3af – (1-naphthyl)diphenylmethane**

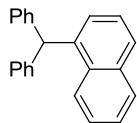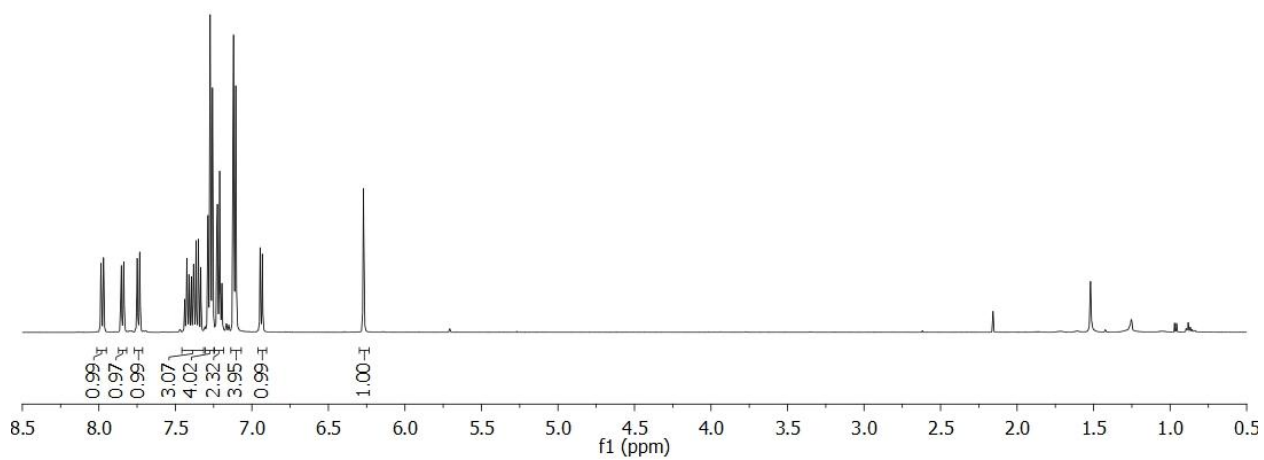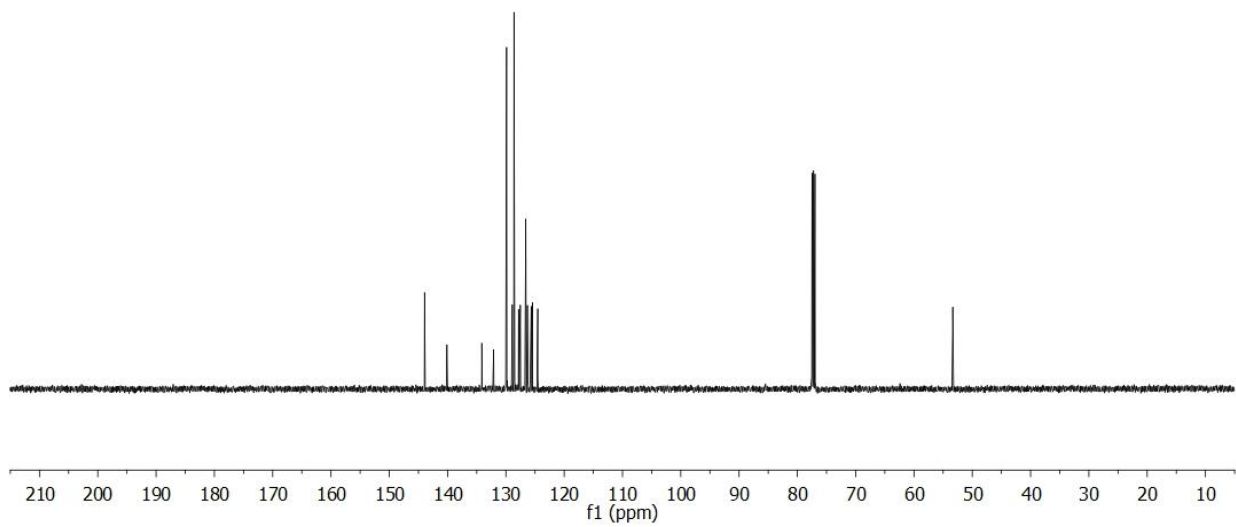



**3ag – (4-cyanophenyl)diphenylmethane**

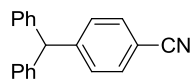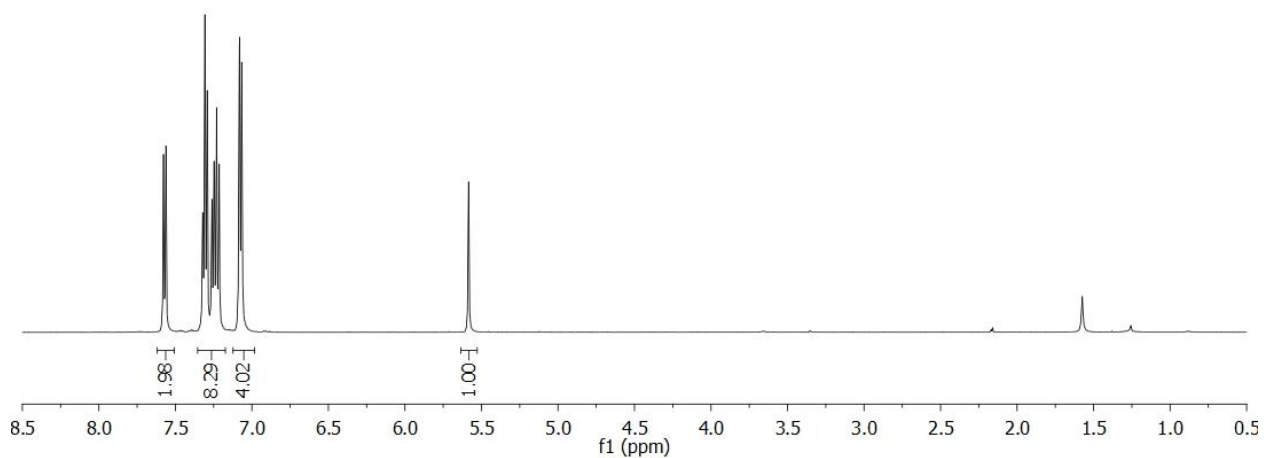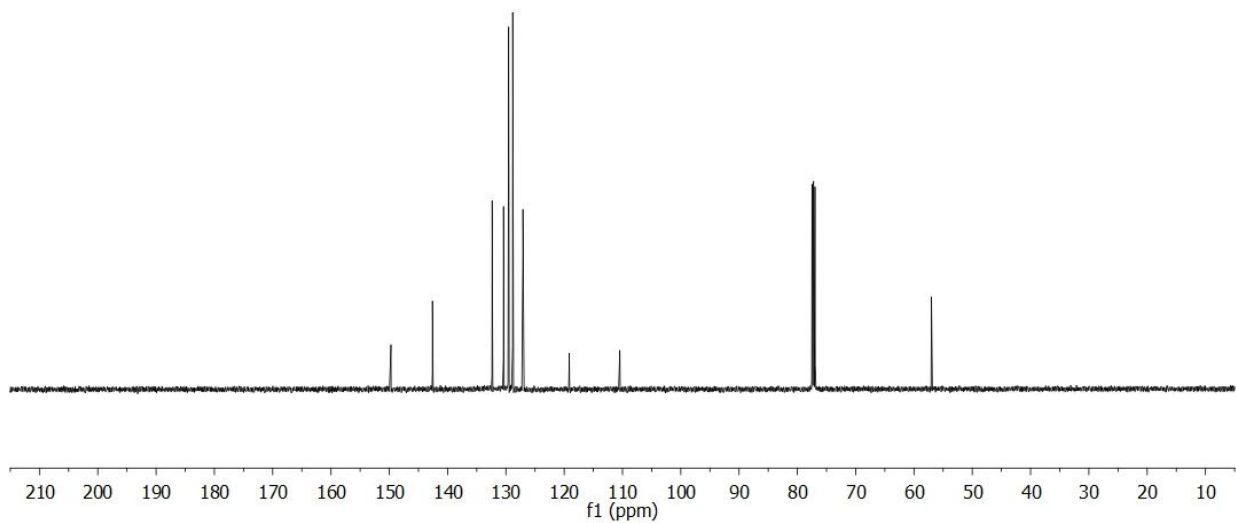

**3ai – (2-pyridyl)diphenylmethane**

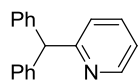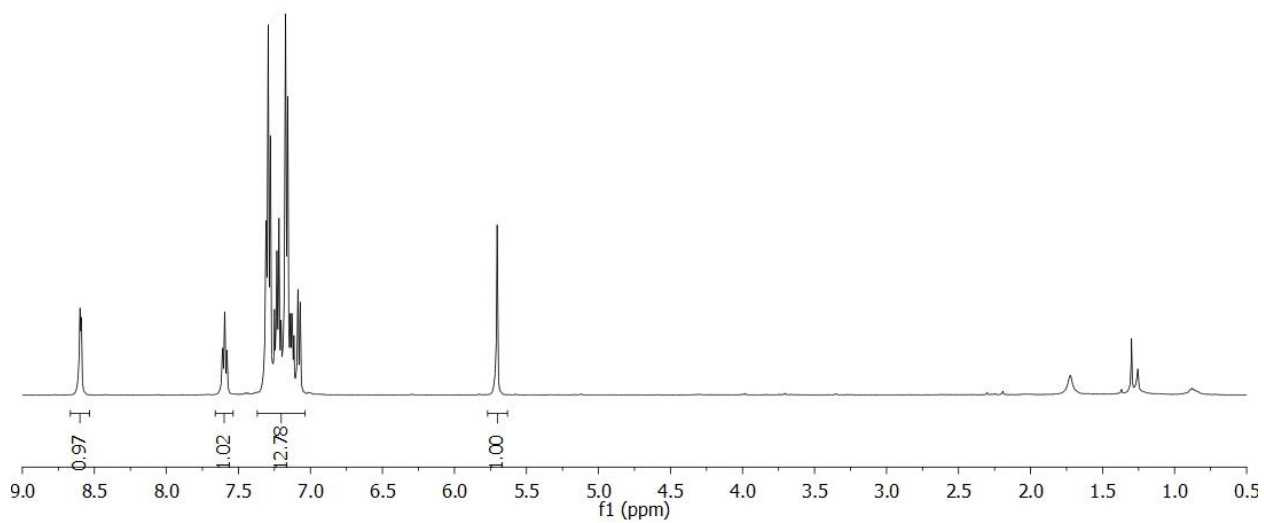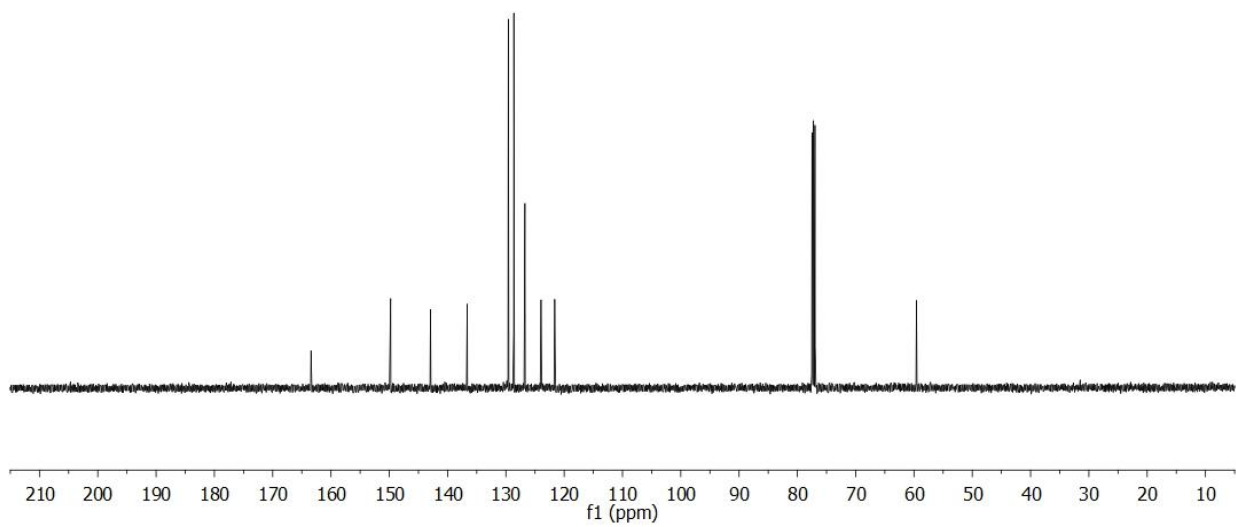

**3ba – (4-*tert*-butylphenyl)(2-pyridyl)phenylmethane**

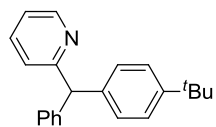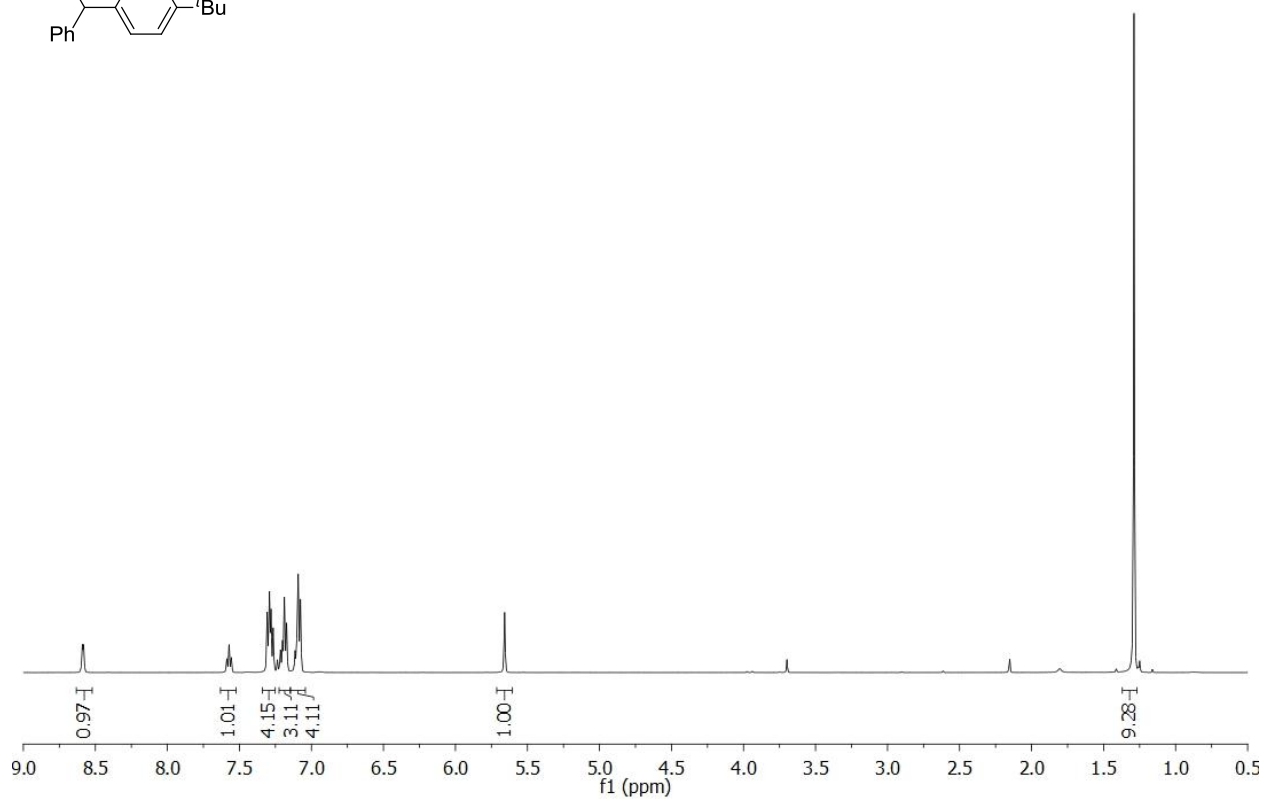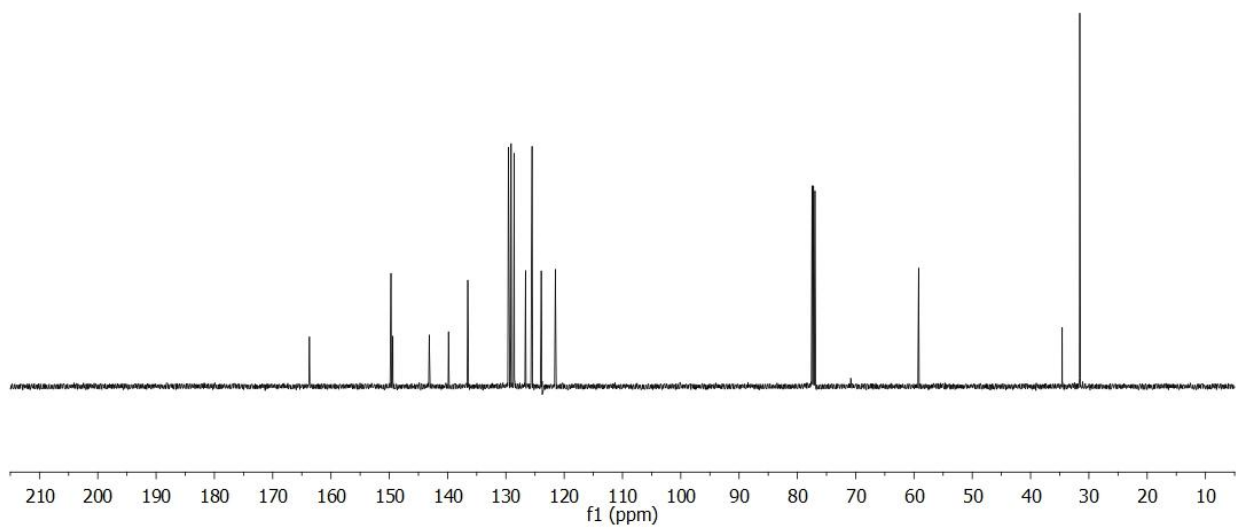

**3bb – (4-fluorophenyl)(2-pyridyl)phenylmethane**

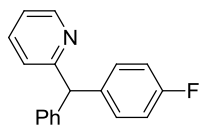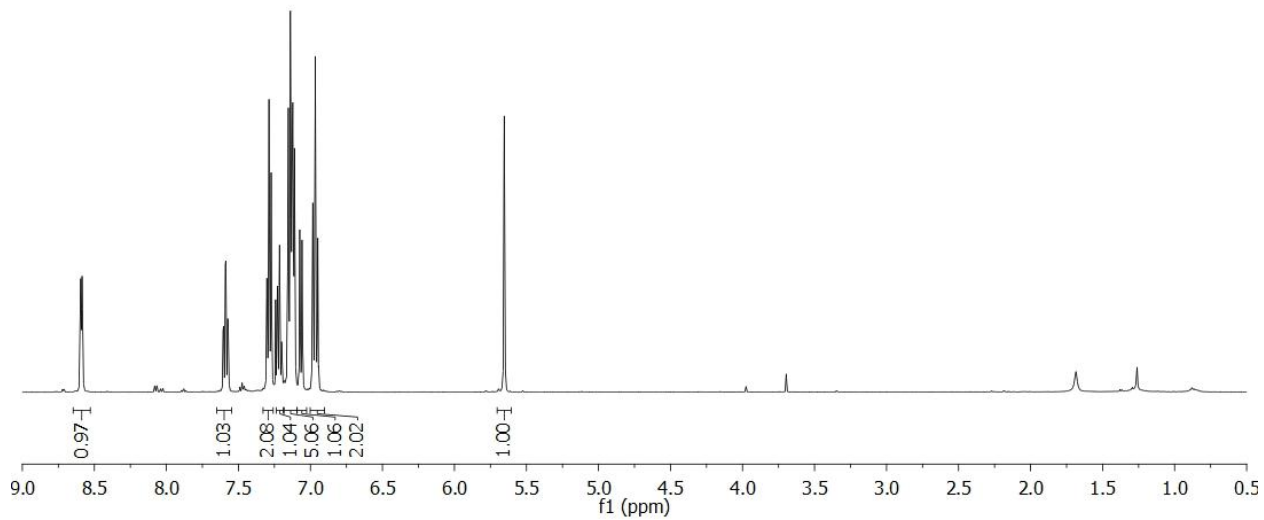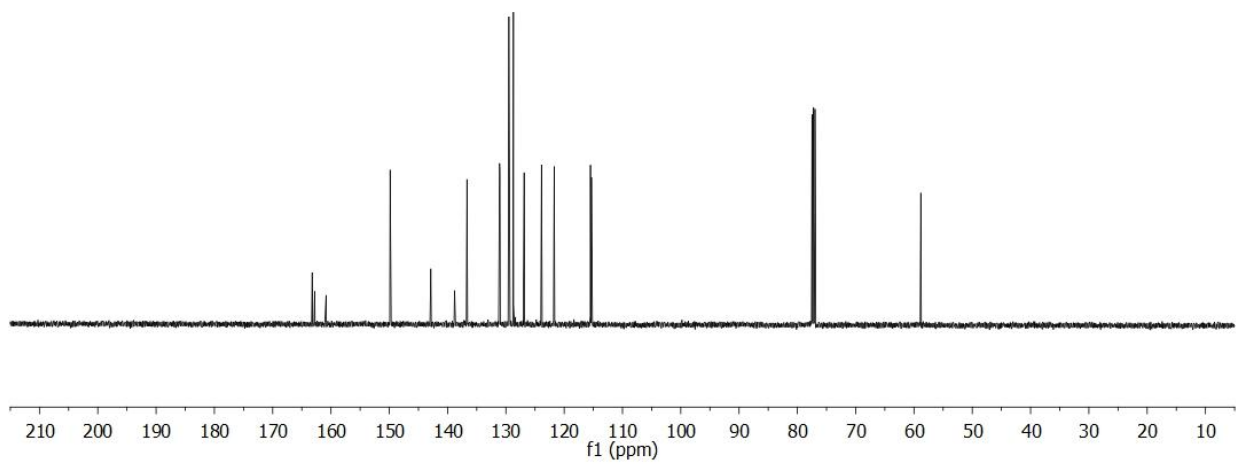

**3bc – (4-trifluoromethylphenyl)(2-pyridyl)phenylmethane**

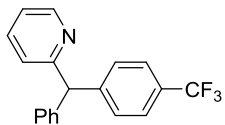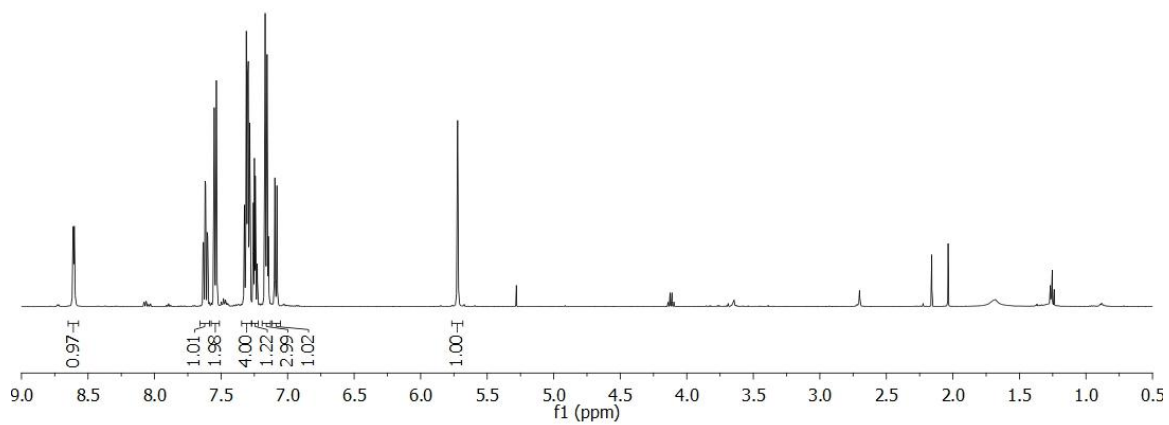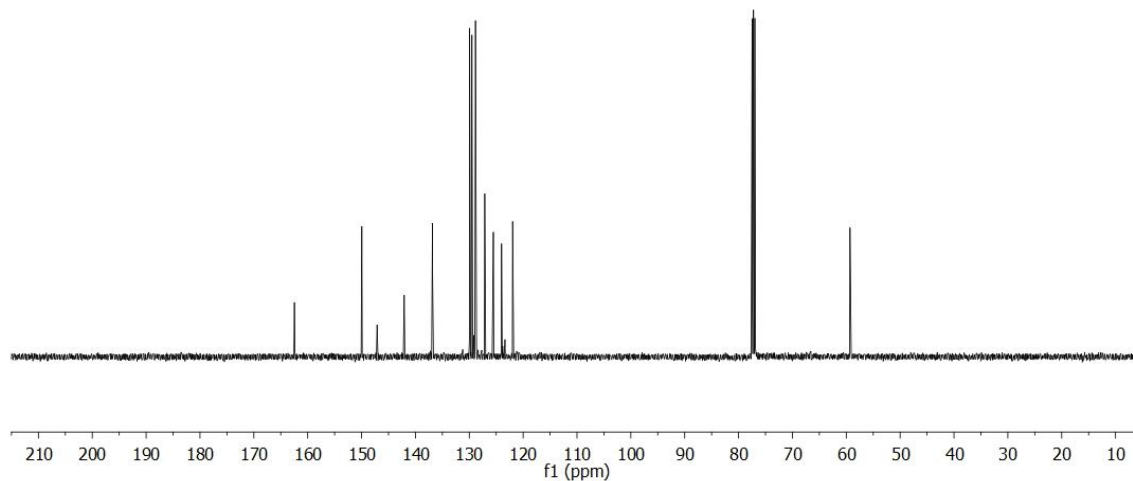

**3bd – (4-methoxyphenyl)(2-pyridyl)phenylmethane**

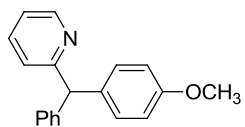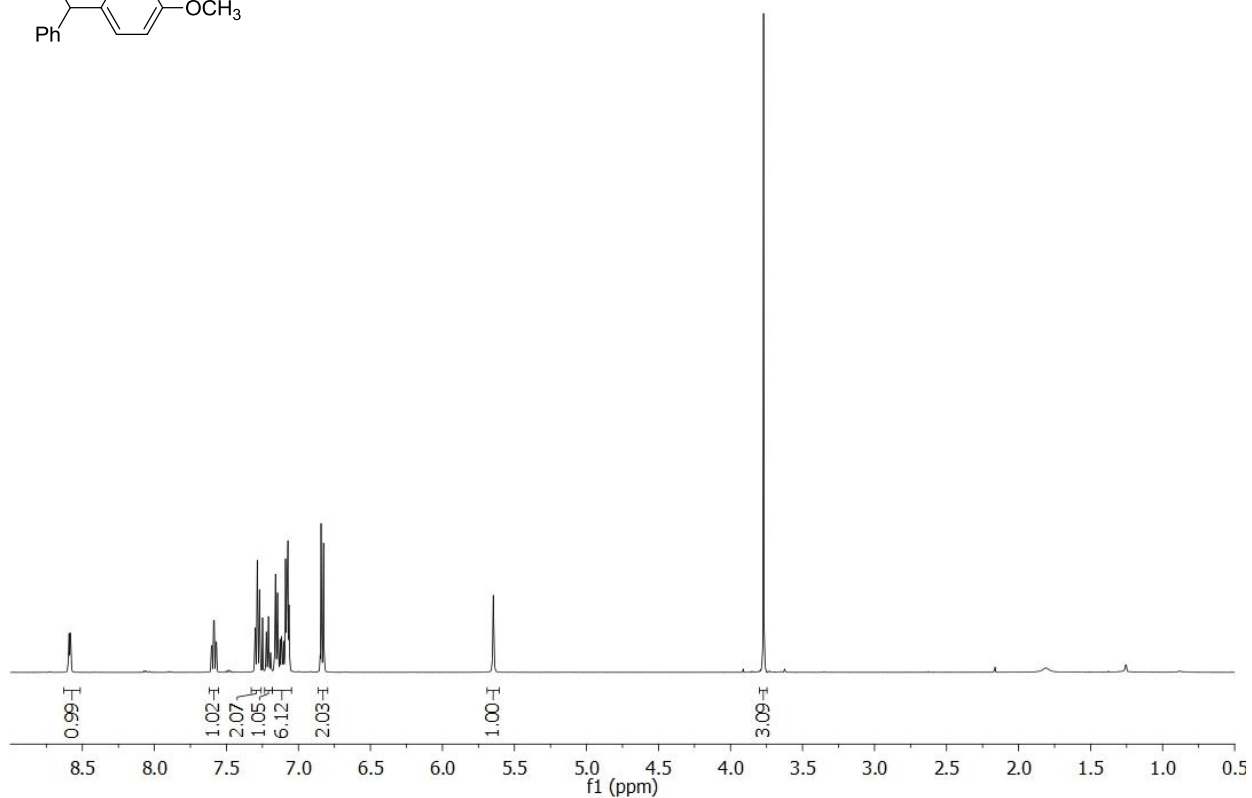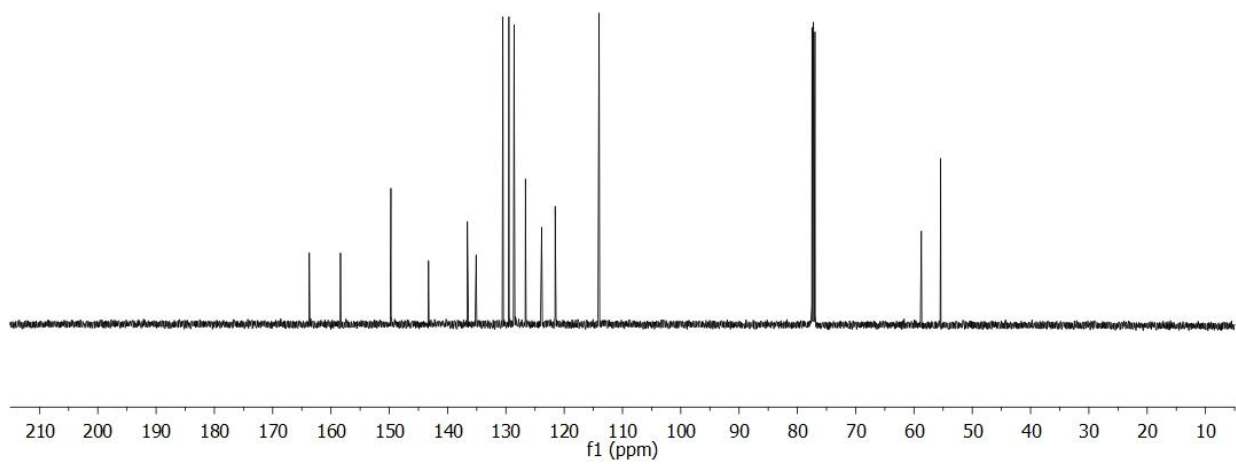

**3be – (4-*N,N*-dimethylaminophenyl)(2-pyridyl)phenylmethane**

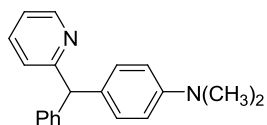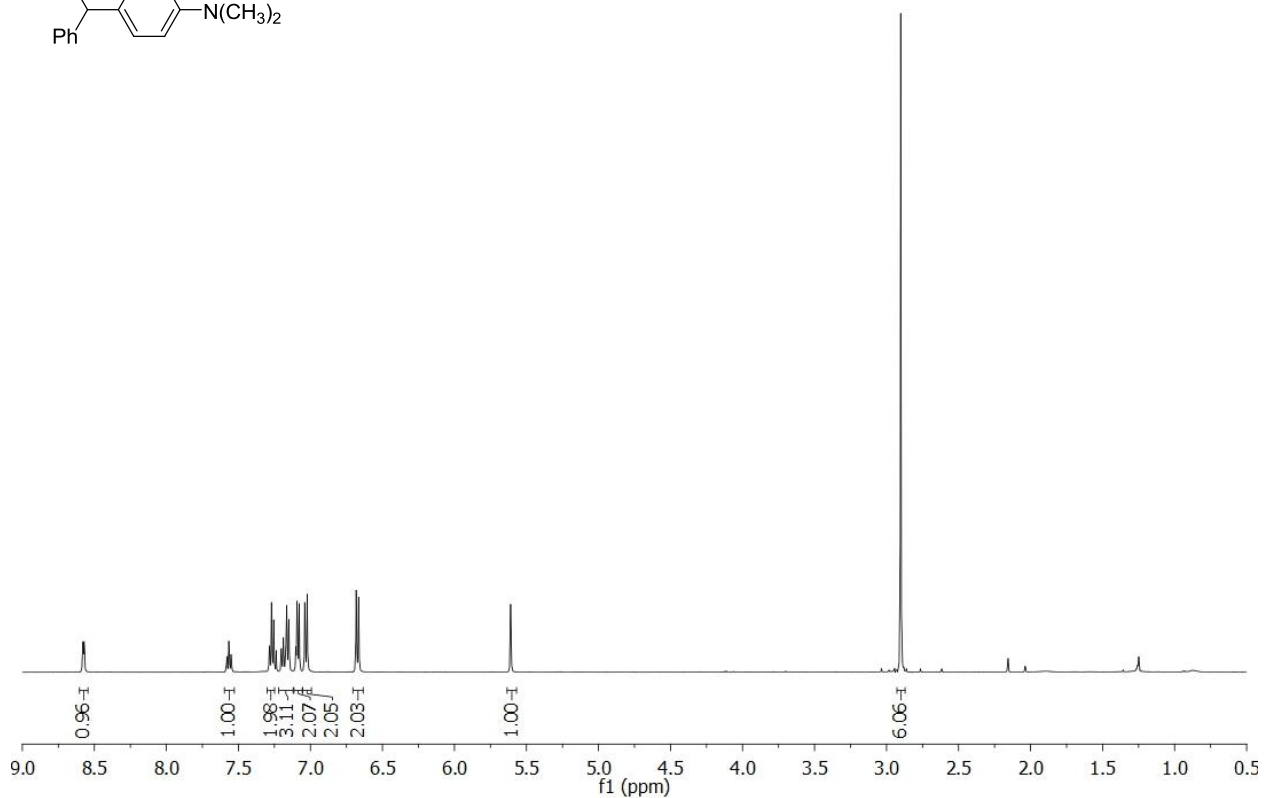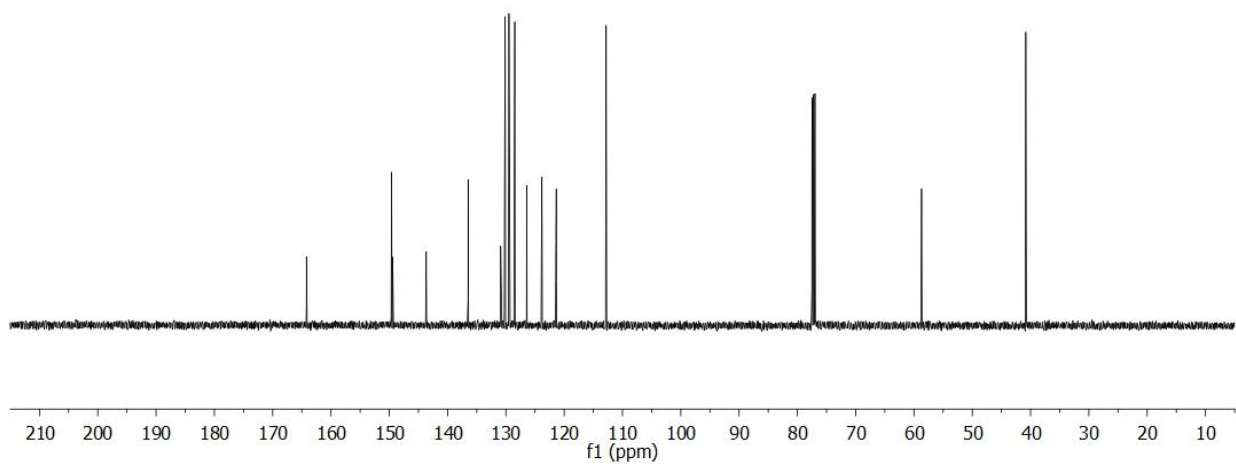

**3bf – (1-naphthyl)(2-pyridyl)phenylmethane**

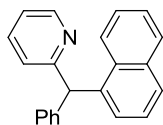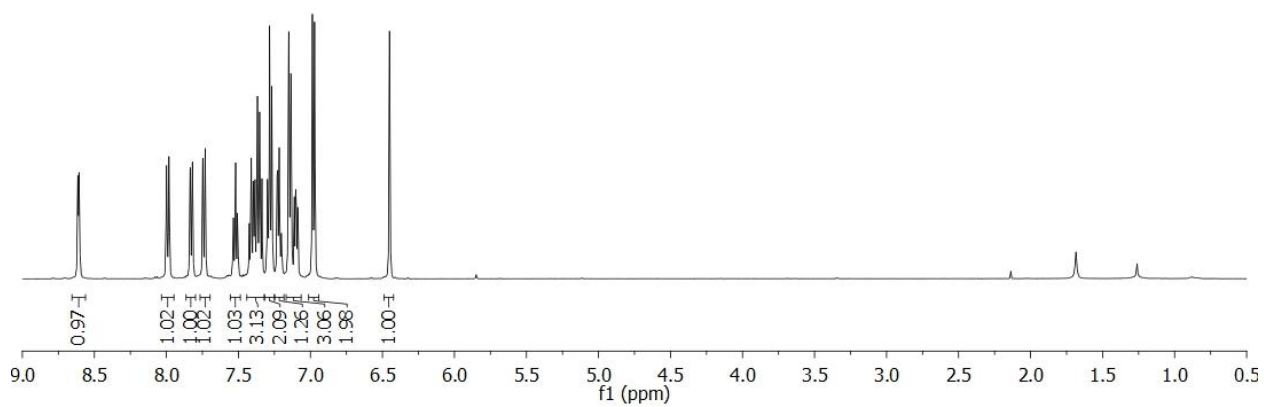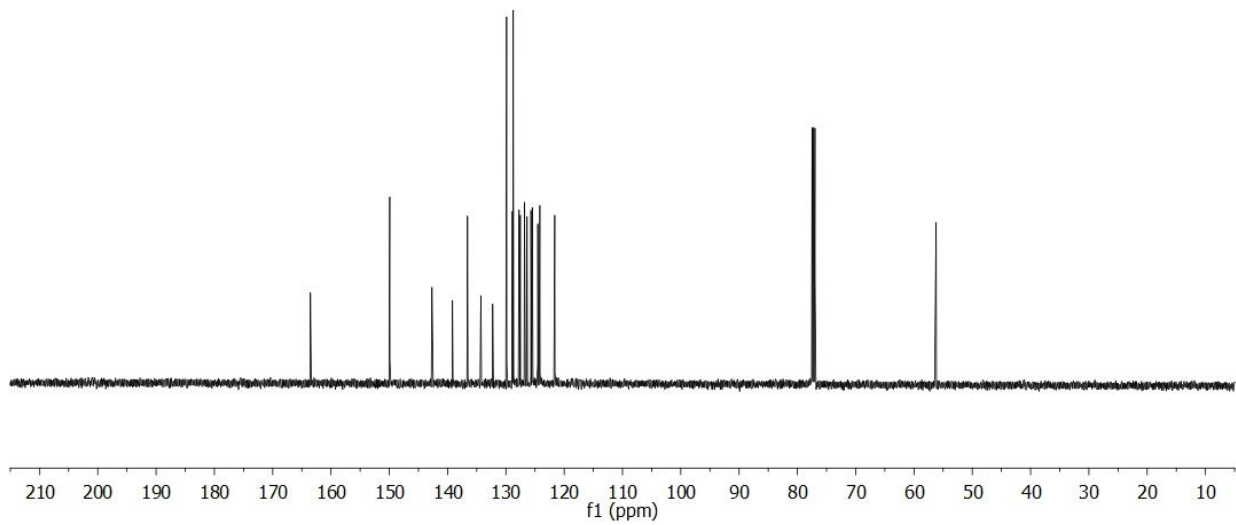



**3bg – (4-cyanophenyl)(2-pyridyl)phenylmethane**

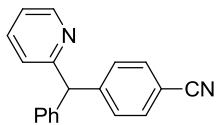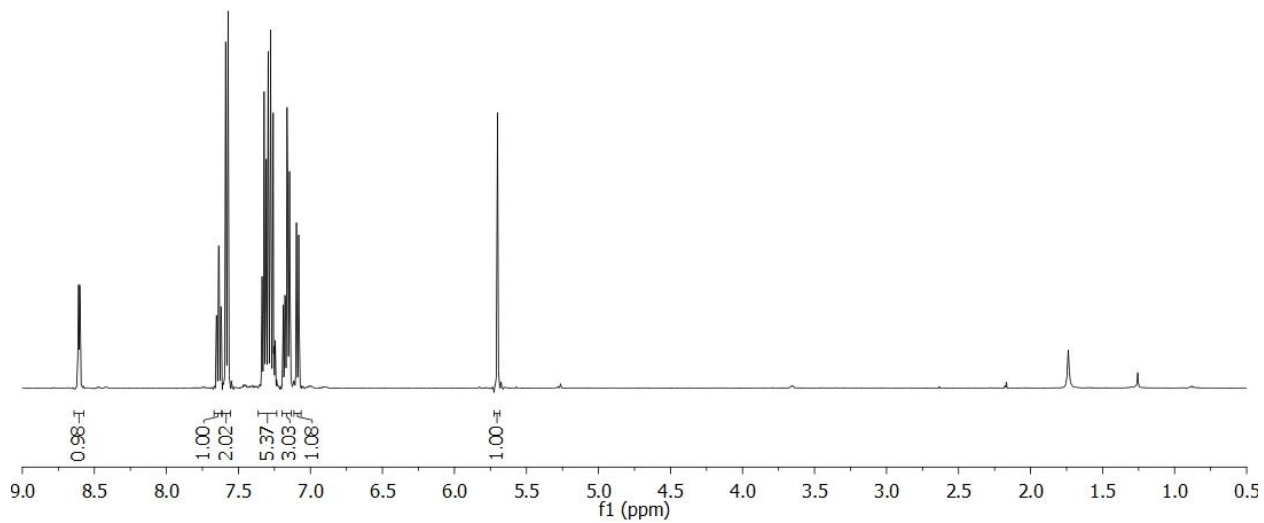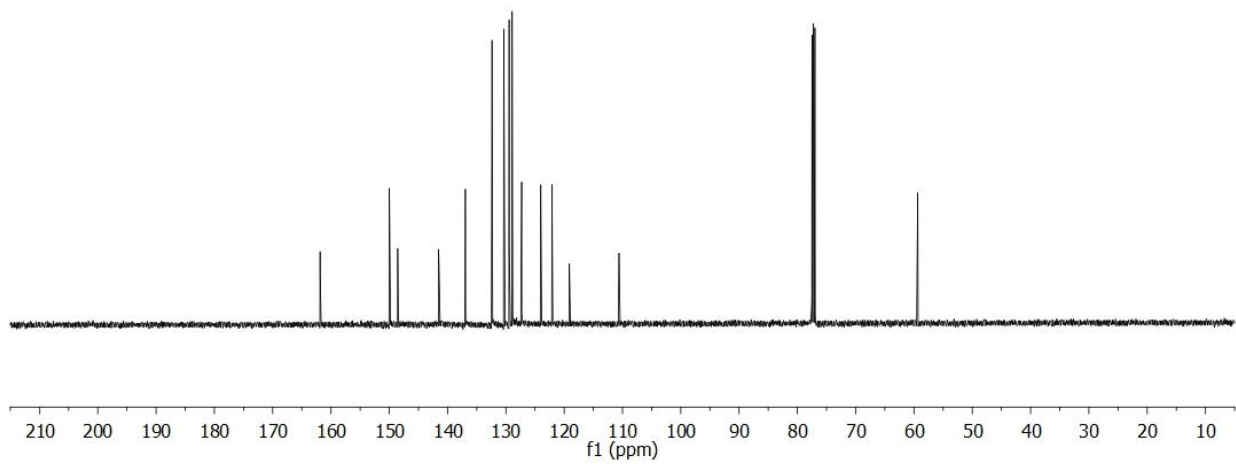

**3bi – 2,2'-(phenylmethylene)dipyridine**

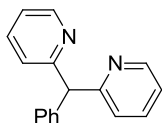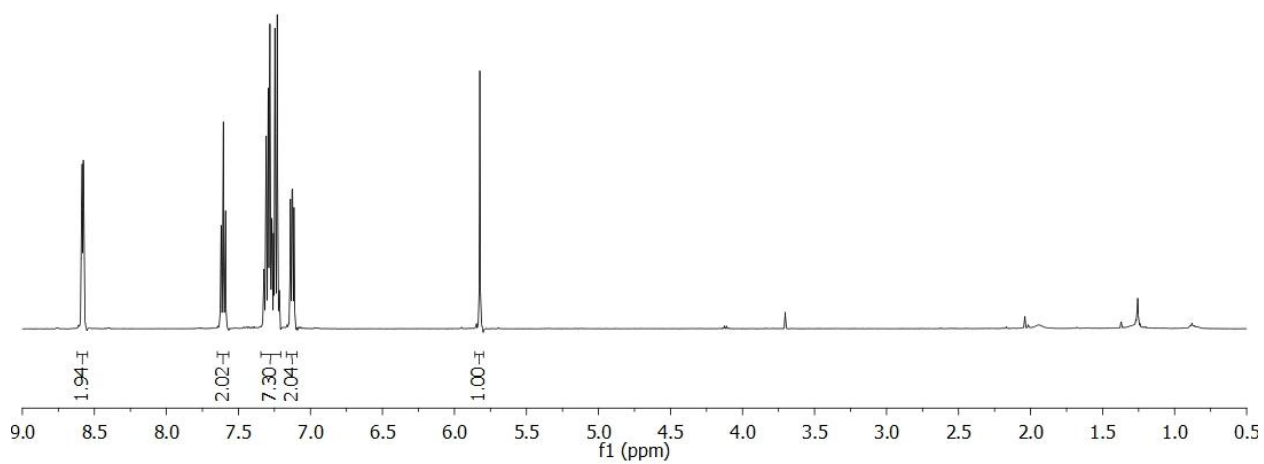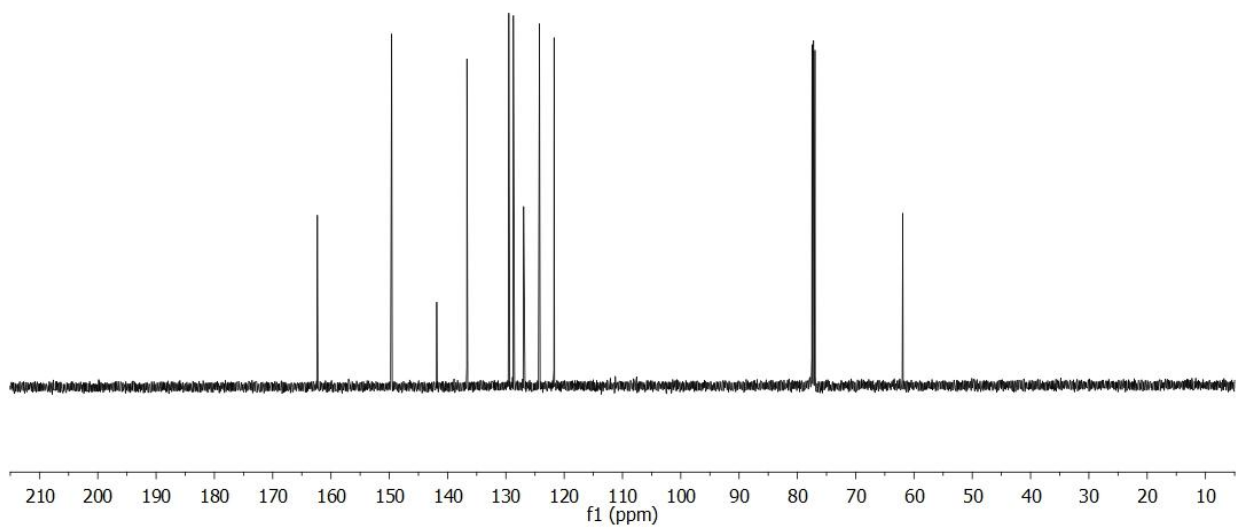

**3ca – (4-*tert*-butylphenyl)(4-methoxyphenyl)phenylmethane**

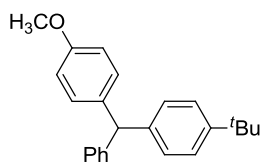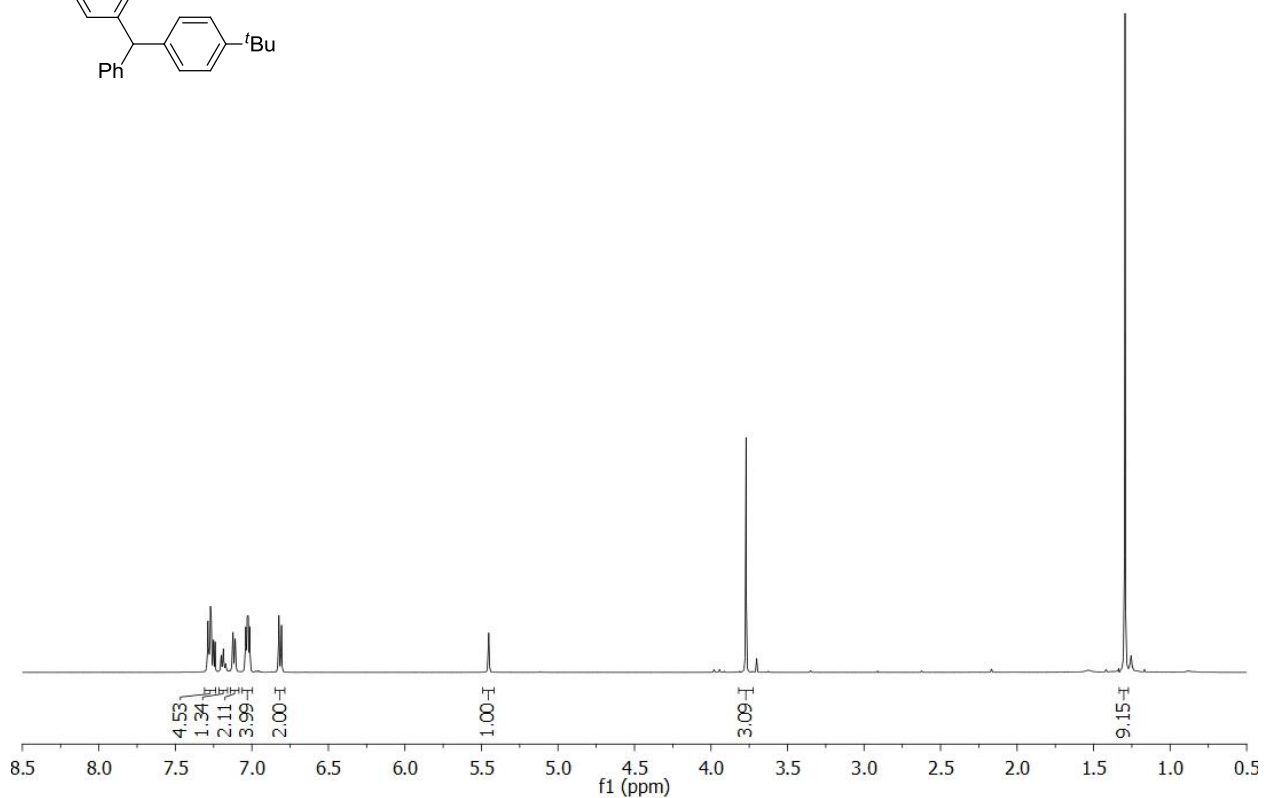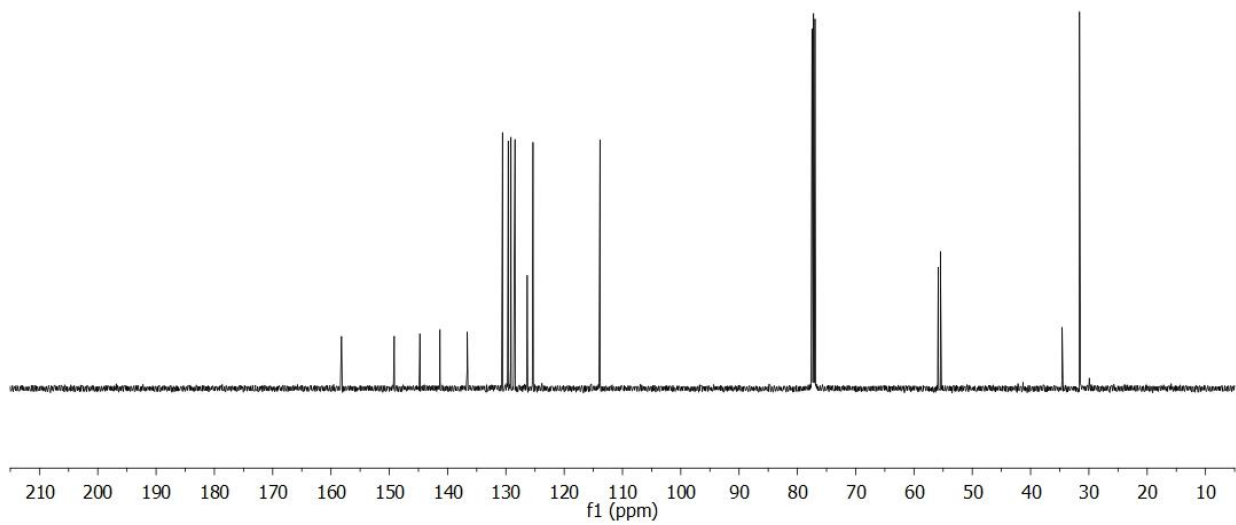

**3cd – (4-methoxyphenyl)(4-methoxyphenyl)phenylmethane**

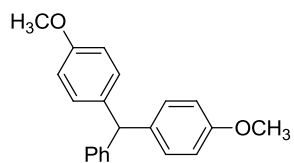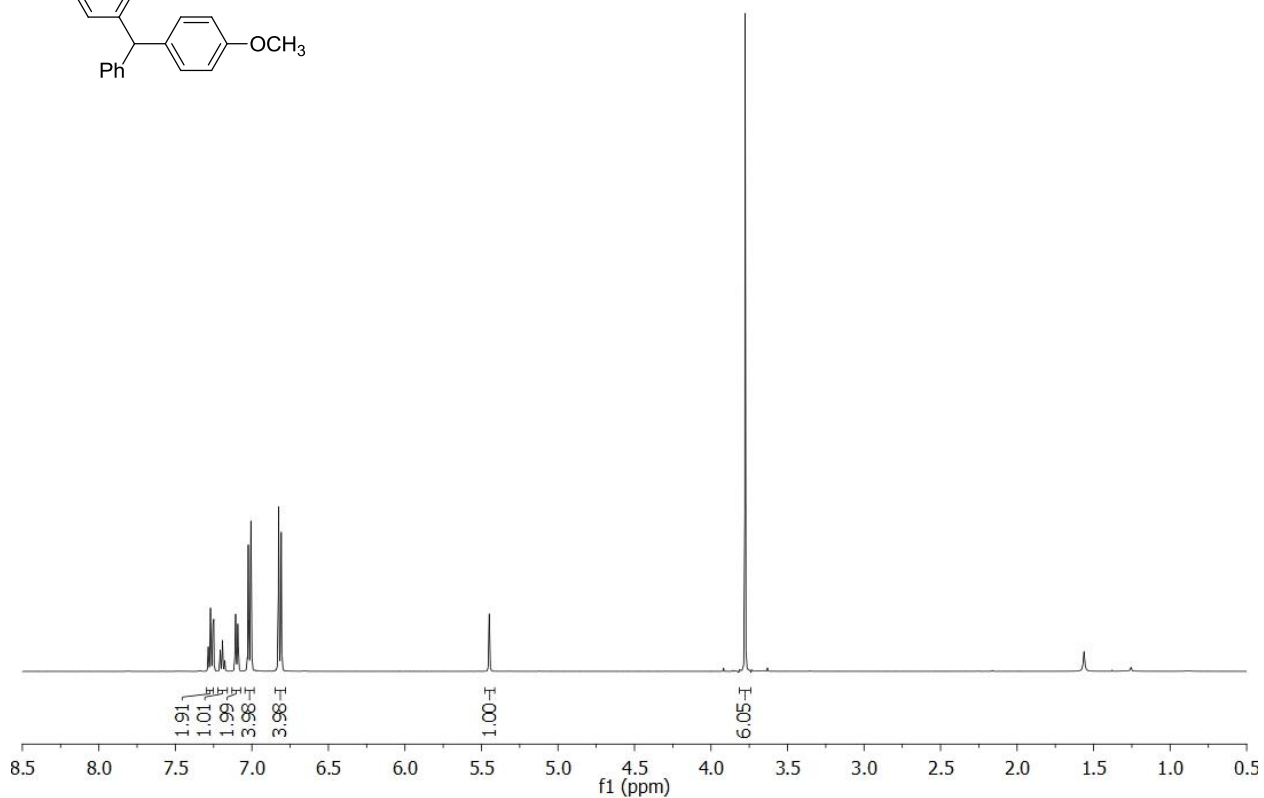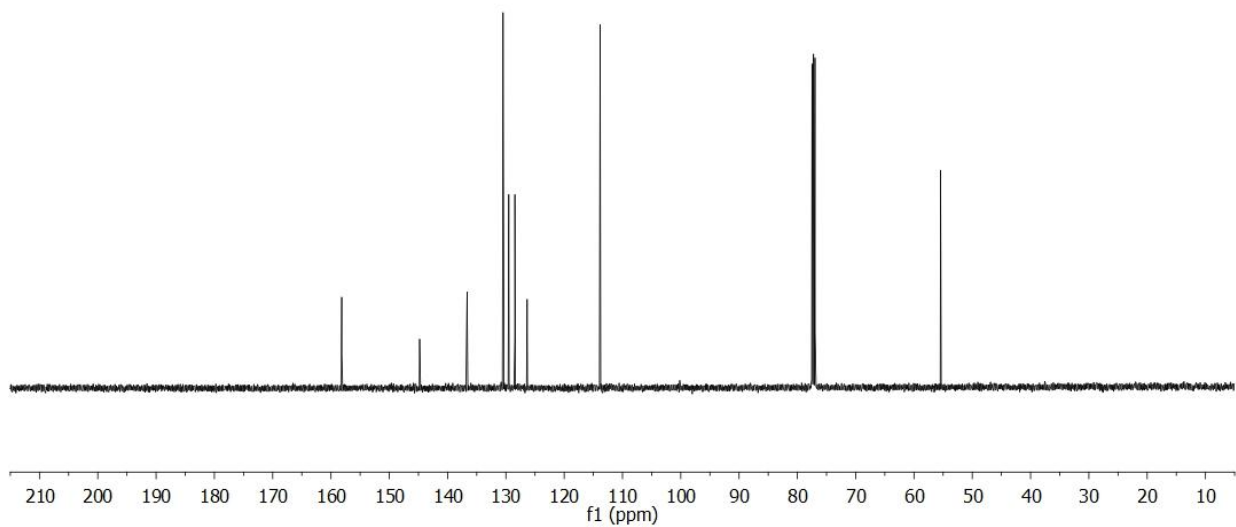

**3ce – (4-*N,N*-dimethylaminophenyl)(4-methoxyphenyl)phenylmethane**

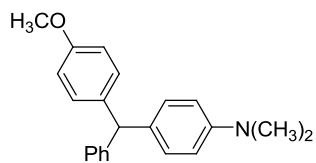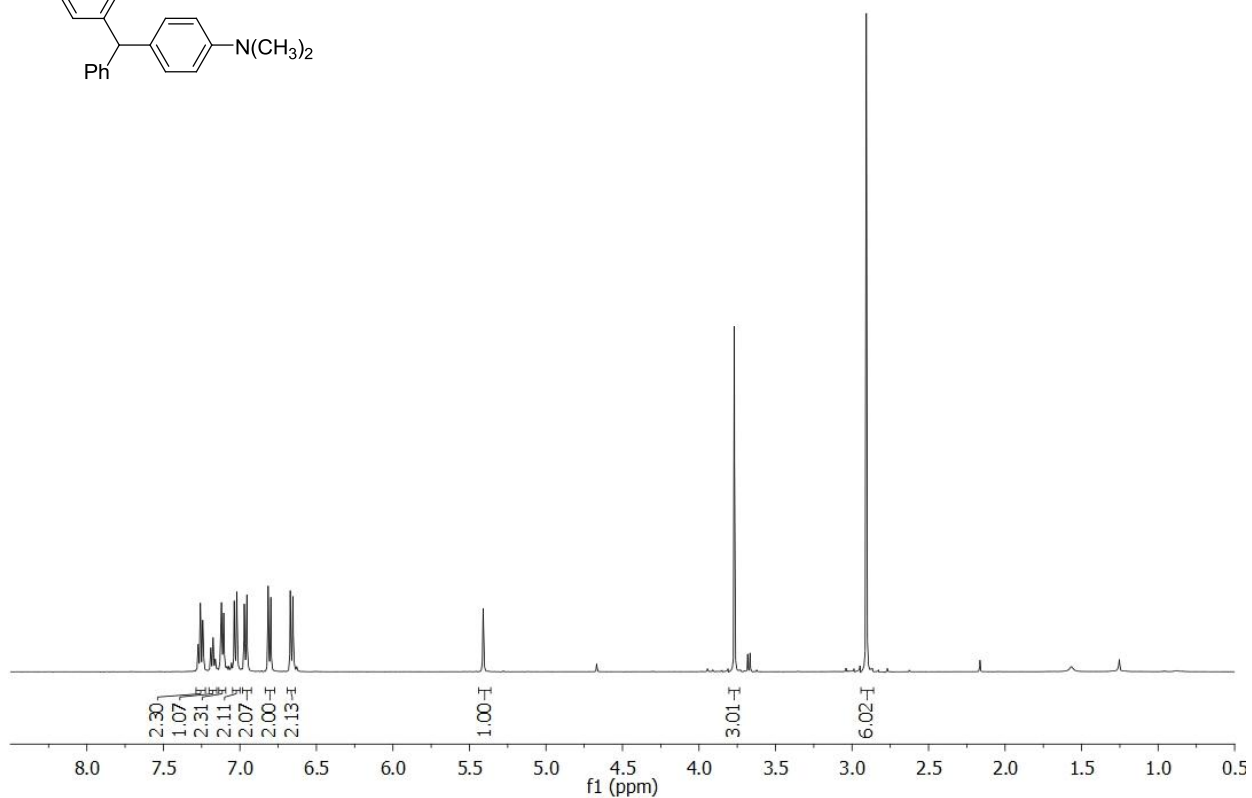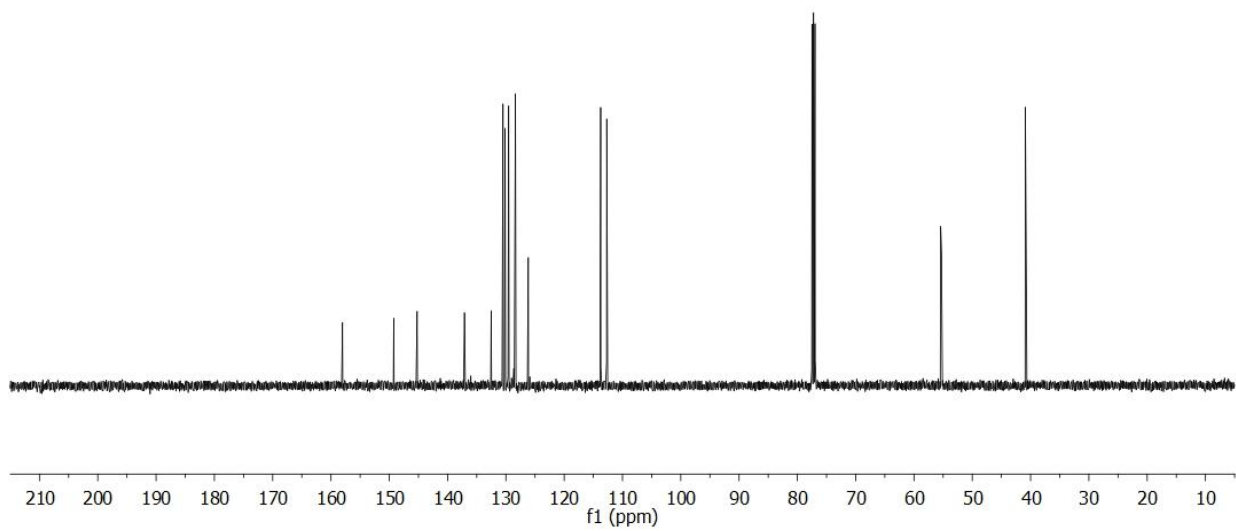

**3cf – (1-naphthyl)(4-methoxyphenyl)phenylmethane**

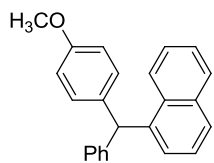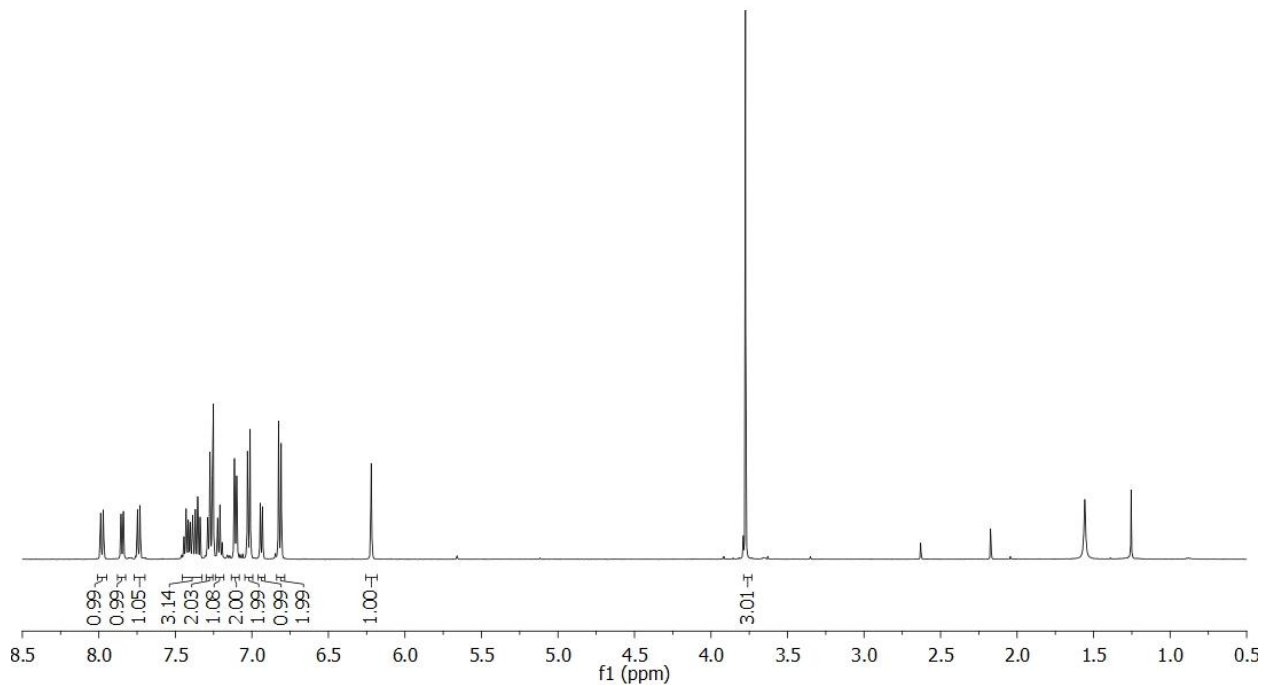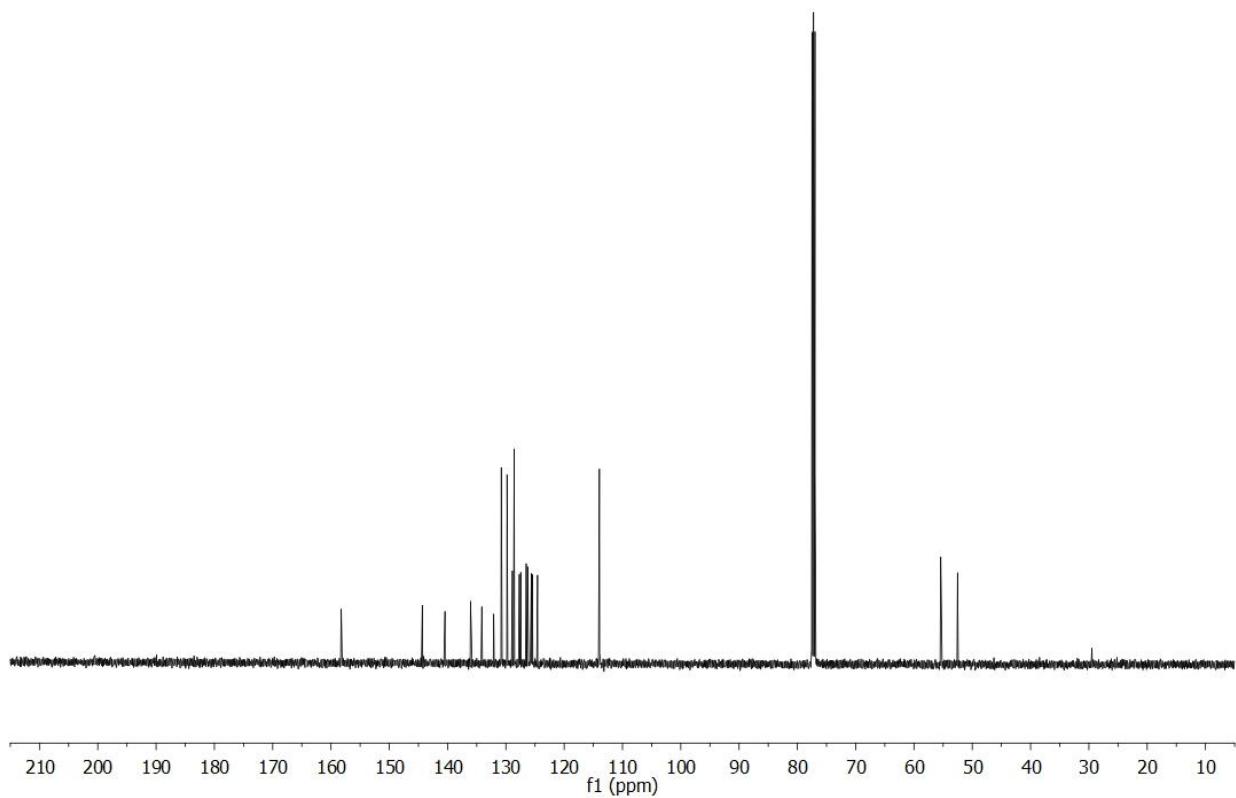

**3da – (4-*tert*-butylphenyl)(4-fluorophenyl)phenylmethane**

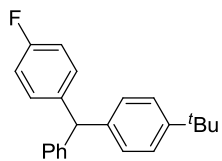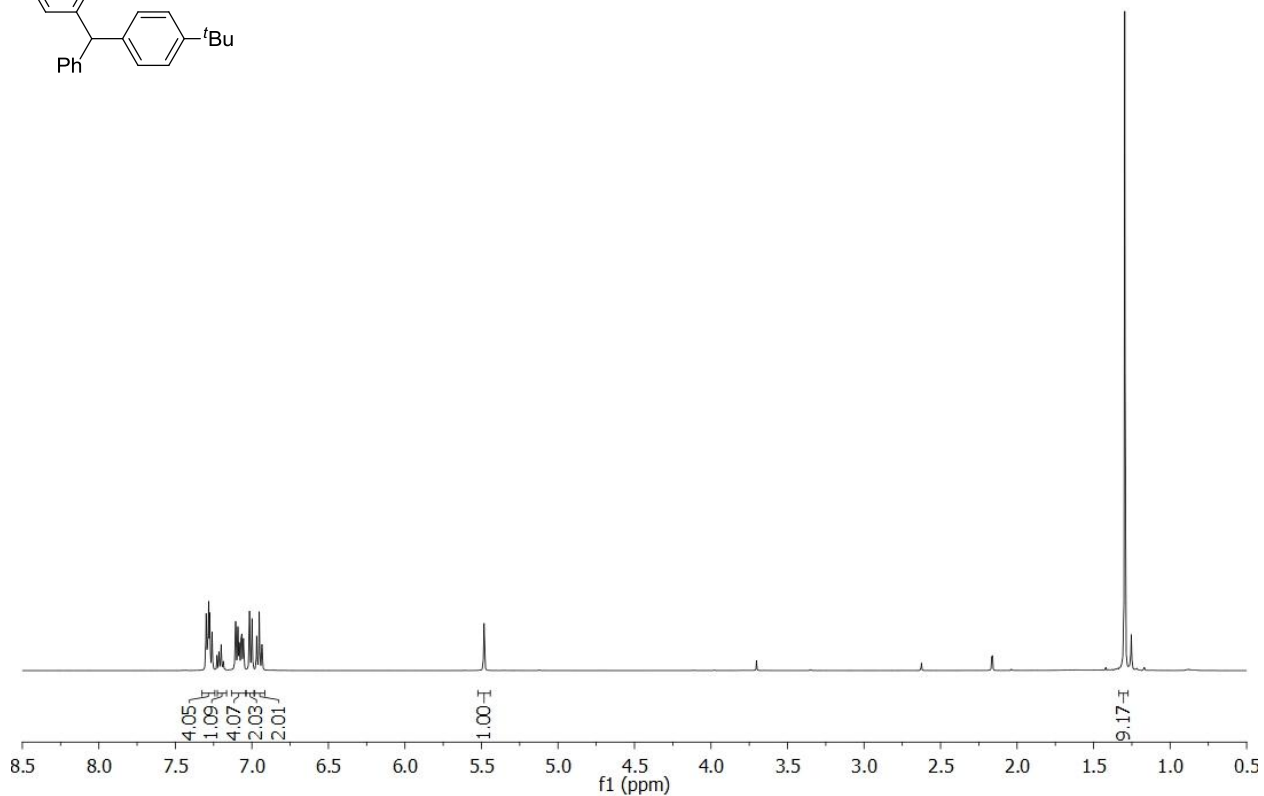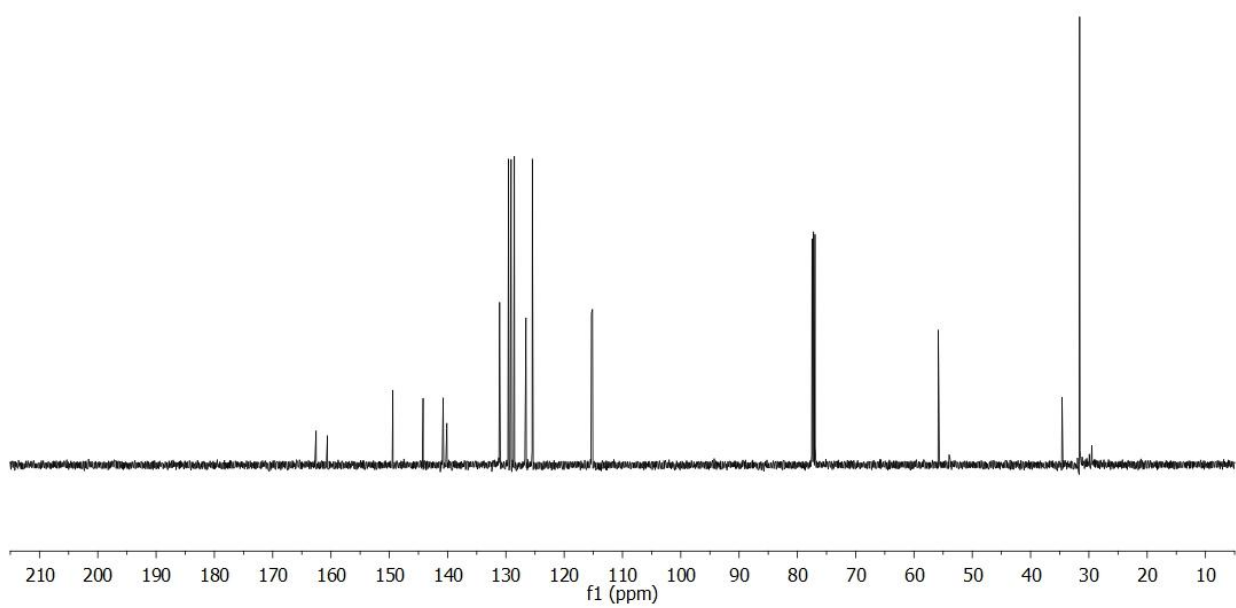

**3db – (4-fluorophenyl)(4-fluorophenyl)phenylmethane**

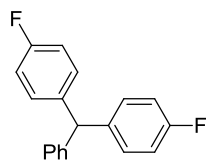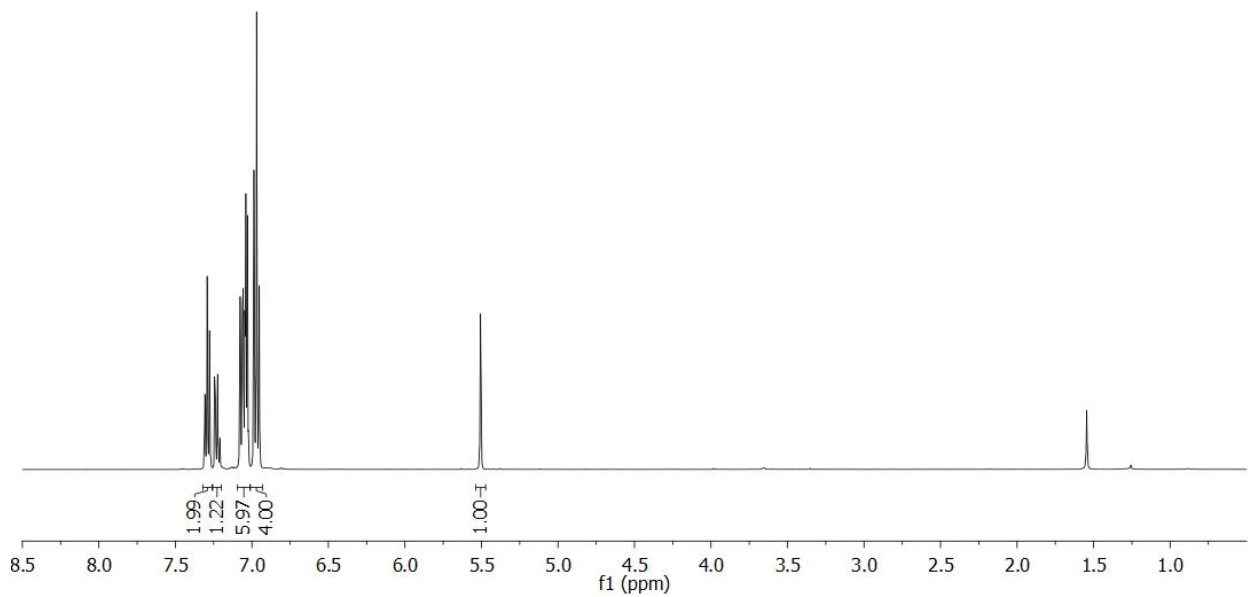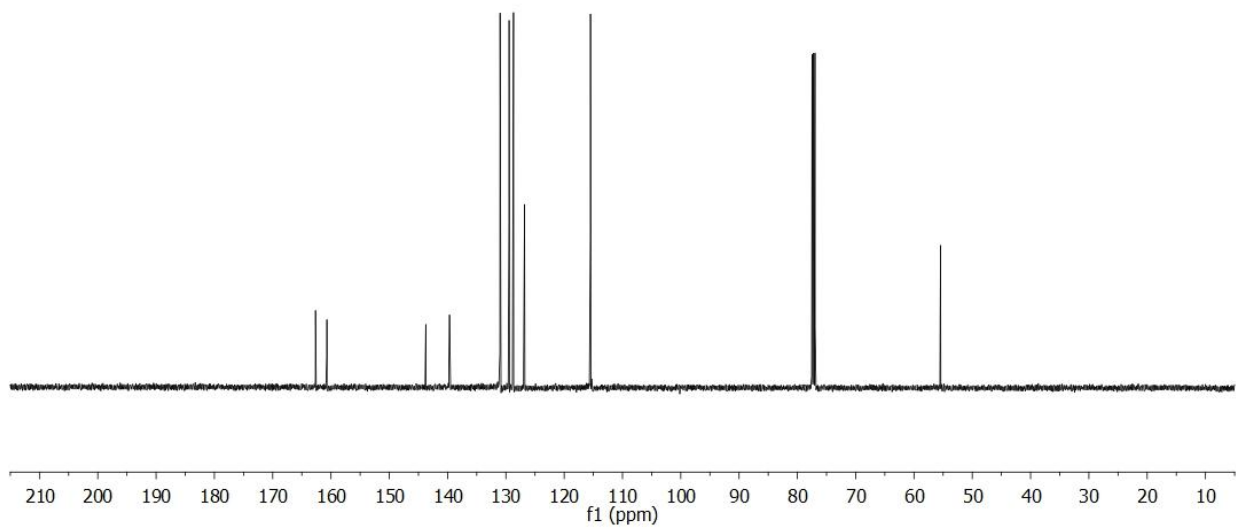



**3dd (= 3cb) – (4-methoxyphenyl)(4-fluorophenyl)phenylmethane**

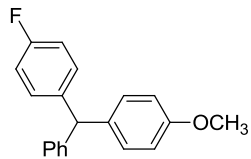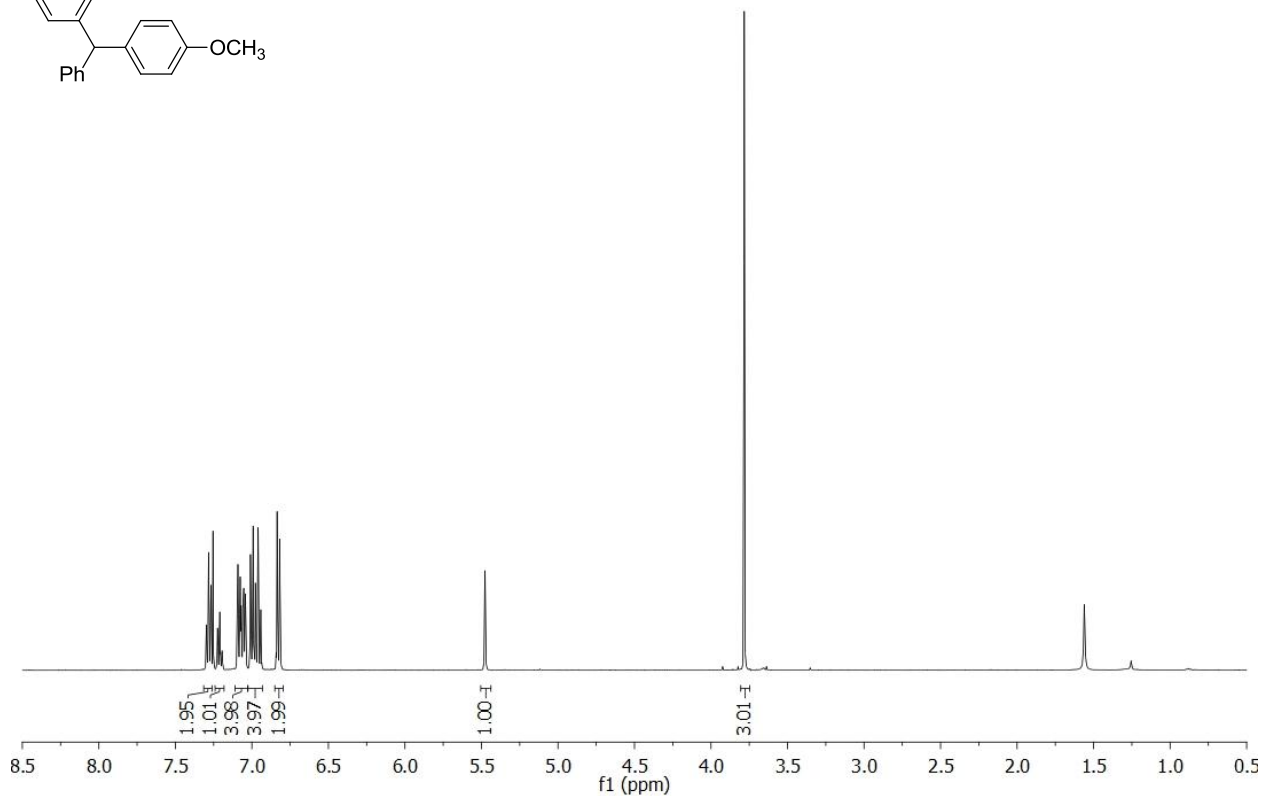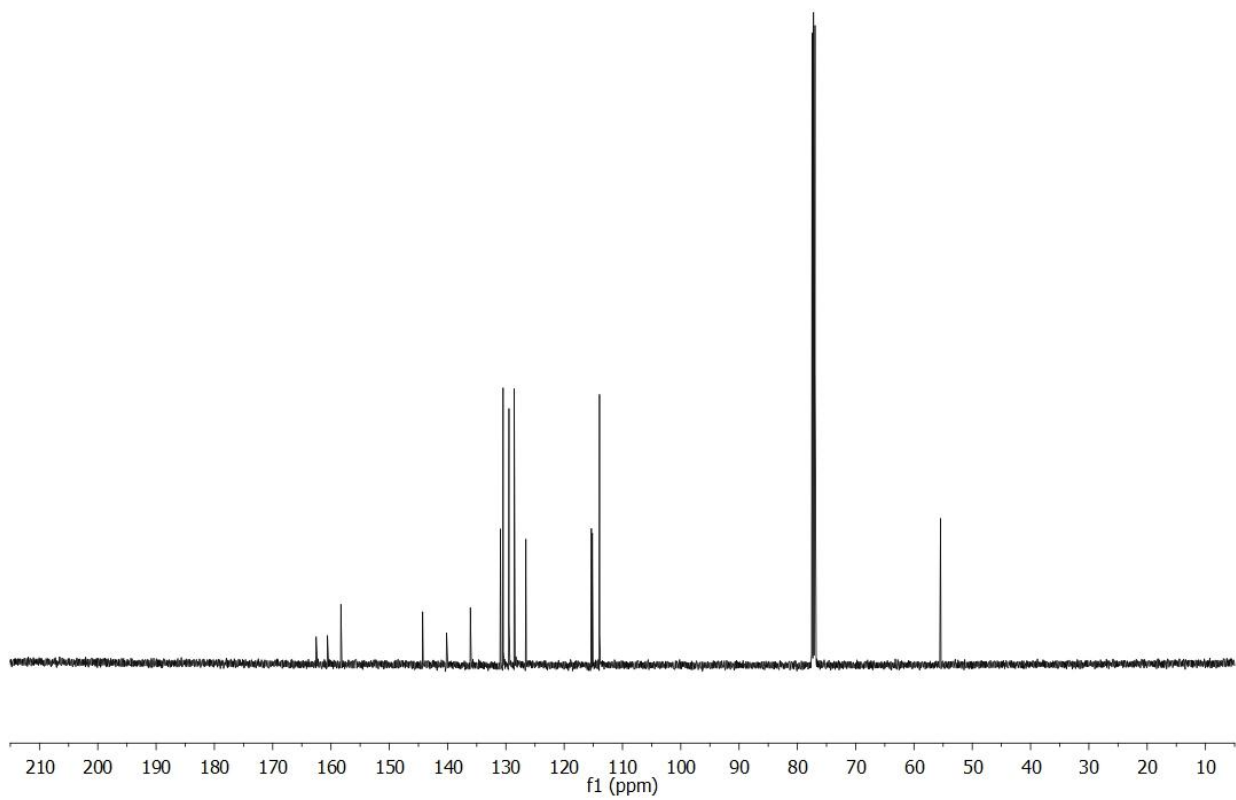

**3de – (4-methoxyphenyl)(4-fluorophenyl)phenylmethane**

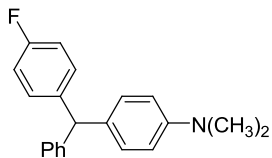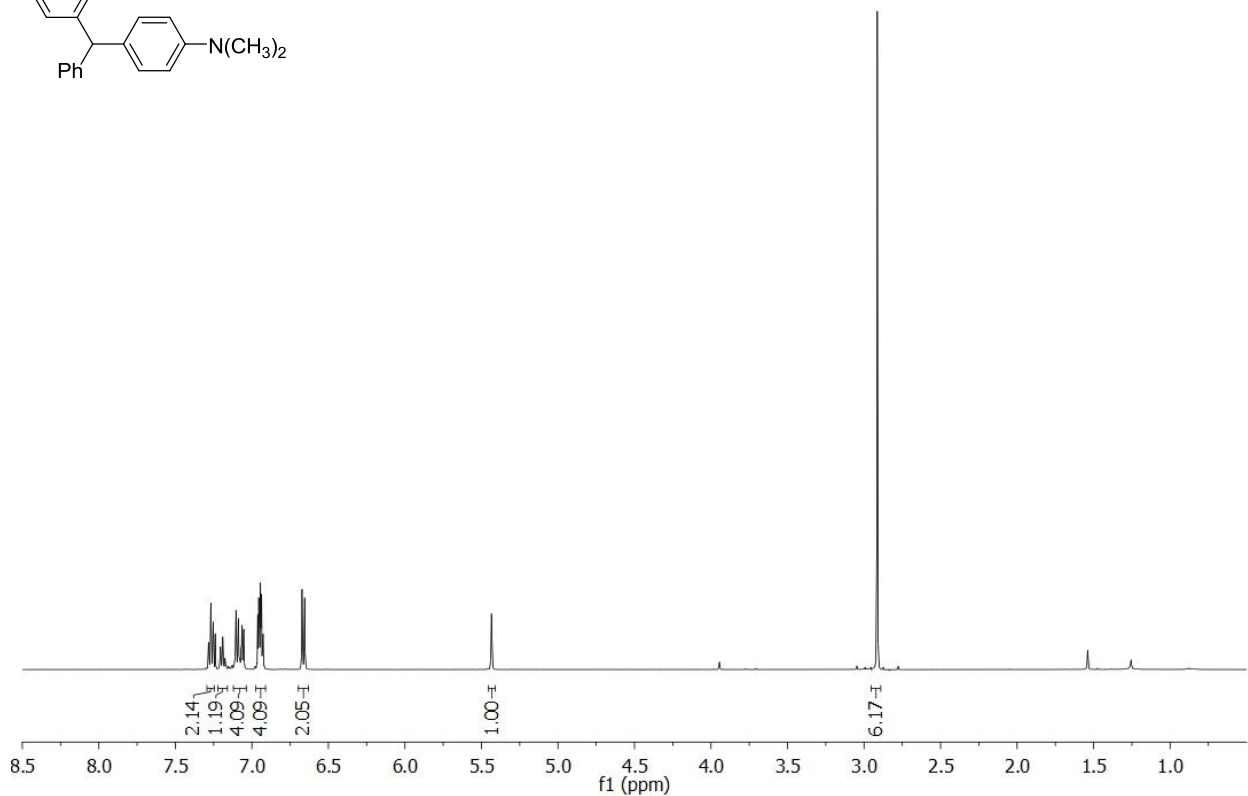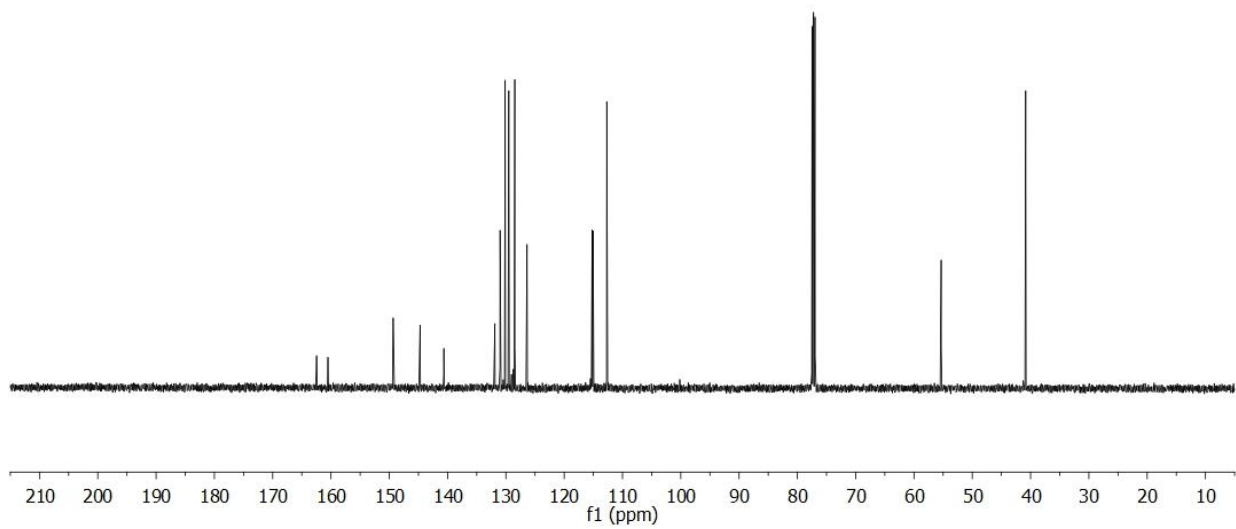

**3df – (1-naphthyl)(4-fluorophenyl)phenylmethane**

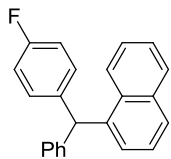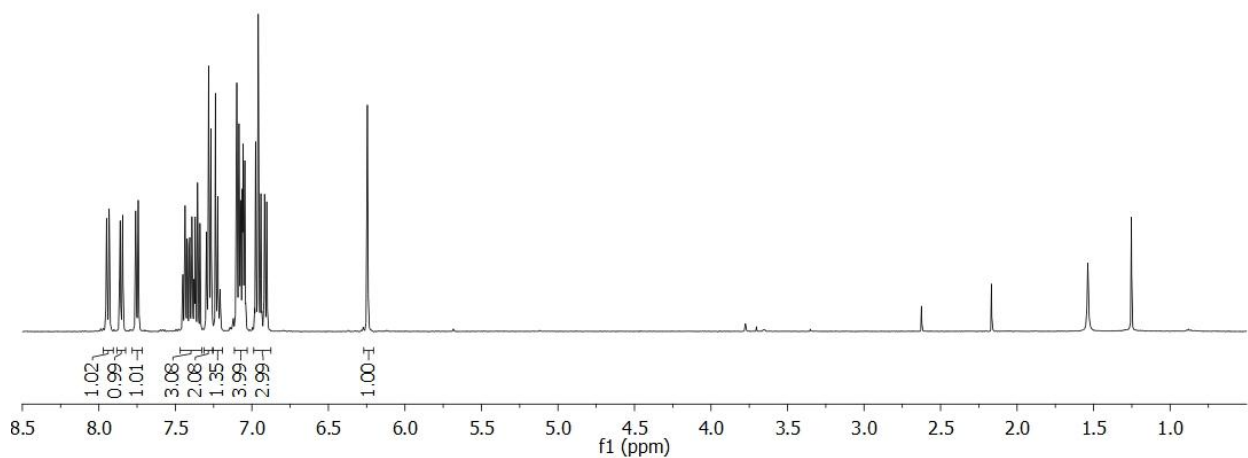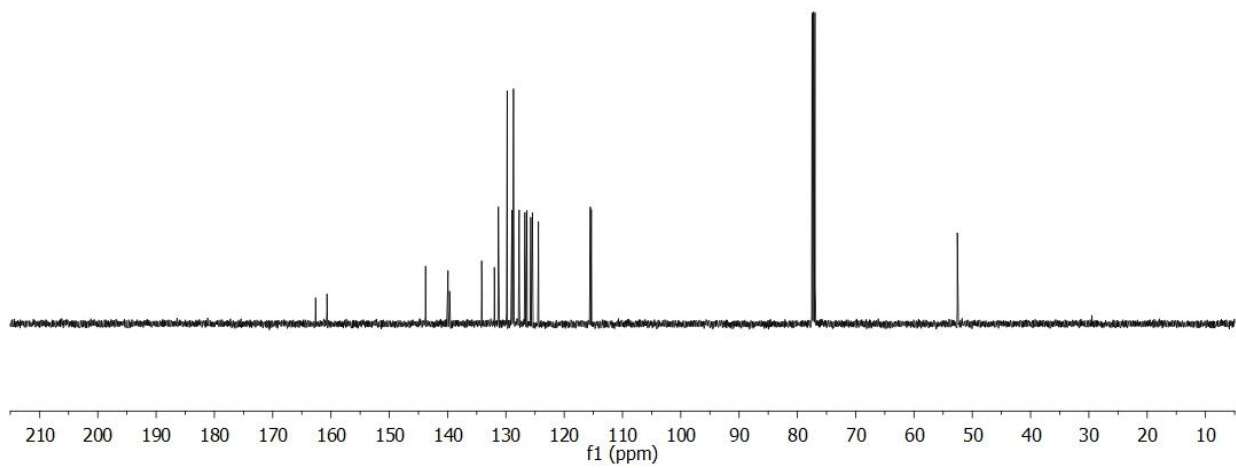

**3dg– (4-cyanophenyl)(4-fluorophenyl)phenylmethane**

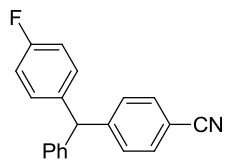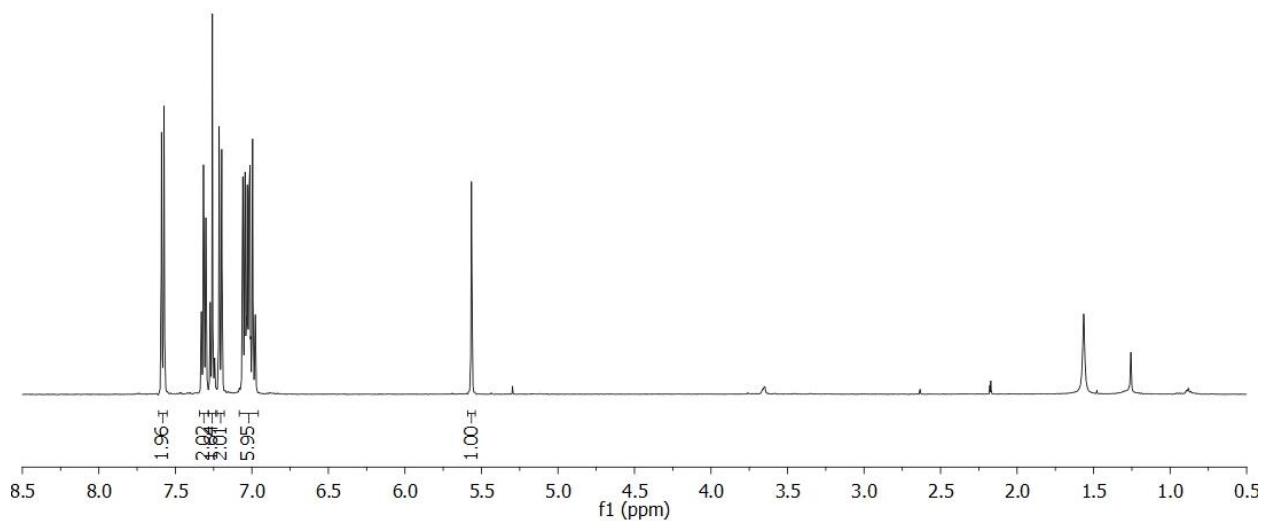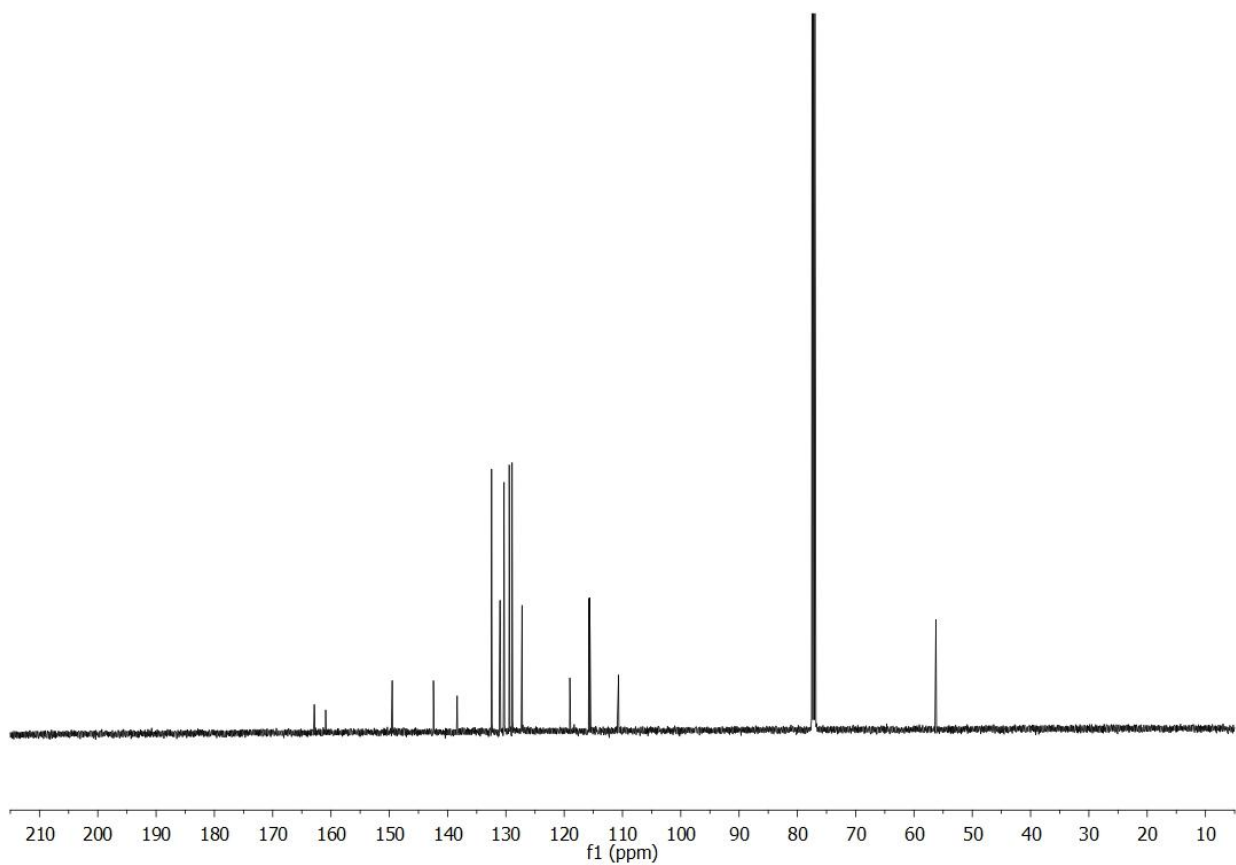

**3di- (2-pyridyl)(4-fluorophenyl)phenylmethane**

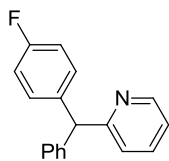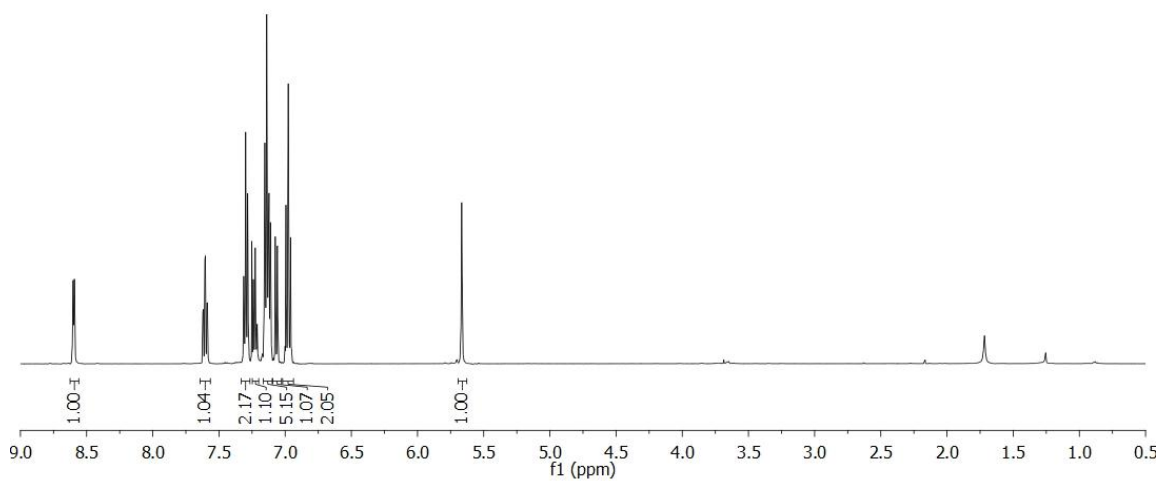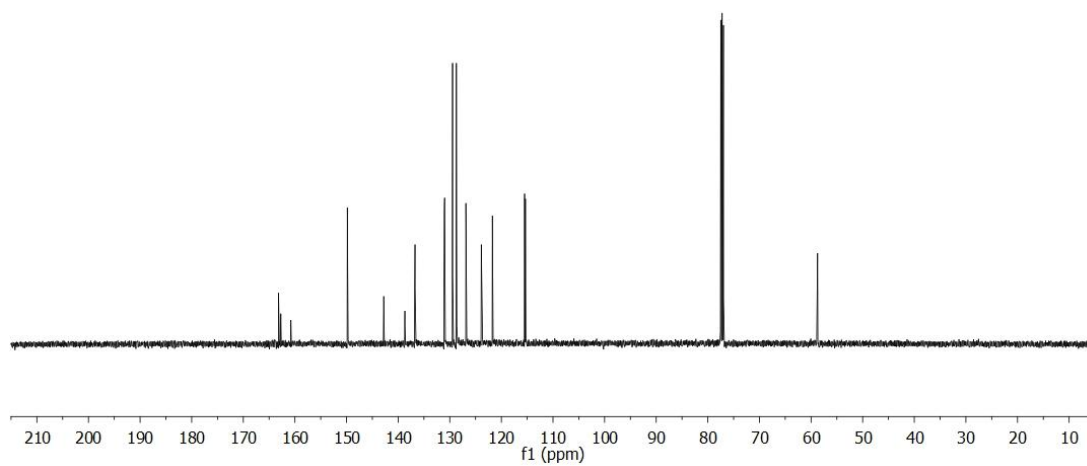

Supplement: c2sc21673f.pdf [file c2sc21673f.pdf]
